# Supplementary material for: First synthesis of cryptands with sucrose scaffold
Source: publisher site journal article supplement (doi:10.3762/bjoc.15.20), 2019-01-23
Supplement: Additional file 1 [file 1860-5397-15-20-S1.pdf]

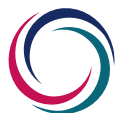

## Supporting Information

for

### First synthesis of cryptands with sucrose scaffold

Patrycja Sokołowska, Michał Kowalski and Sławomir Jarosz

*Beilstein J. Org. Chem.* **2019**, *15*, 210–217. doi:10.3762/bjoc.15.20

### Copies of NMR spectra

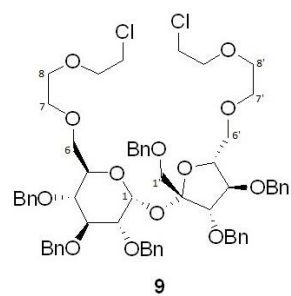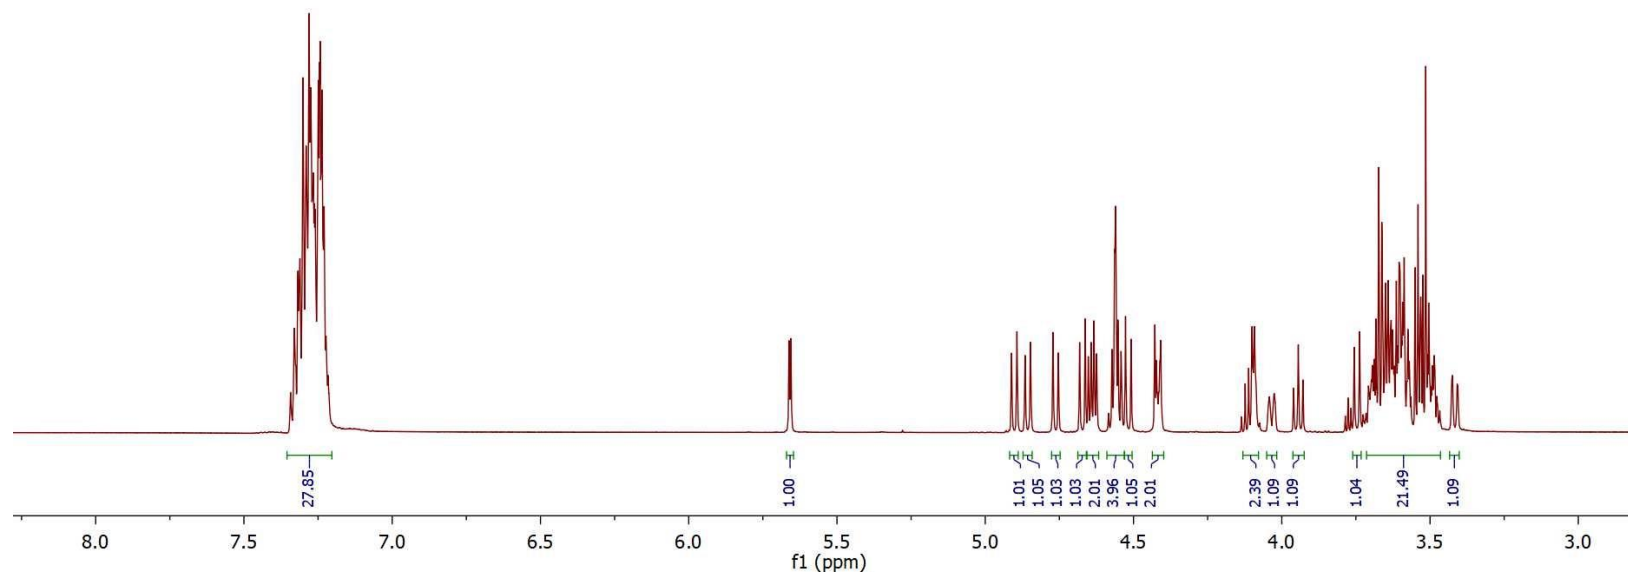

**Figure S1** <sup>1</sup>H NMR spectrum of compound **9** (CDCl<sub>3</sub>).

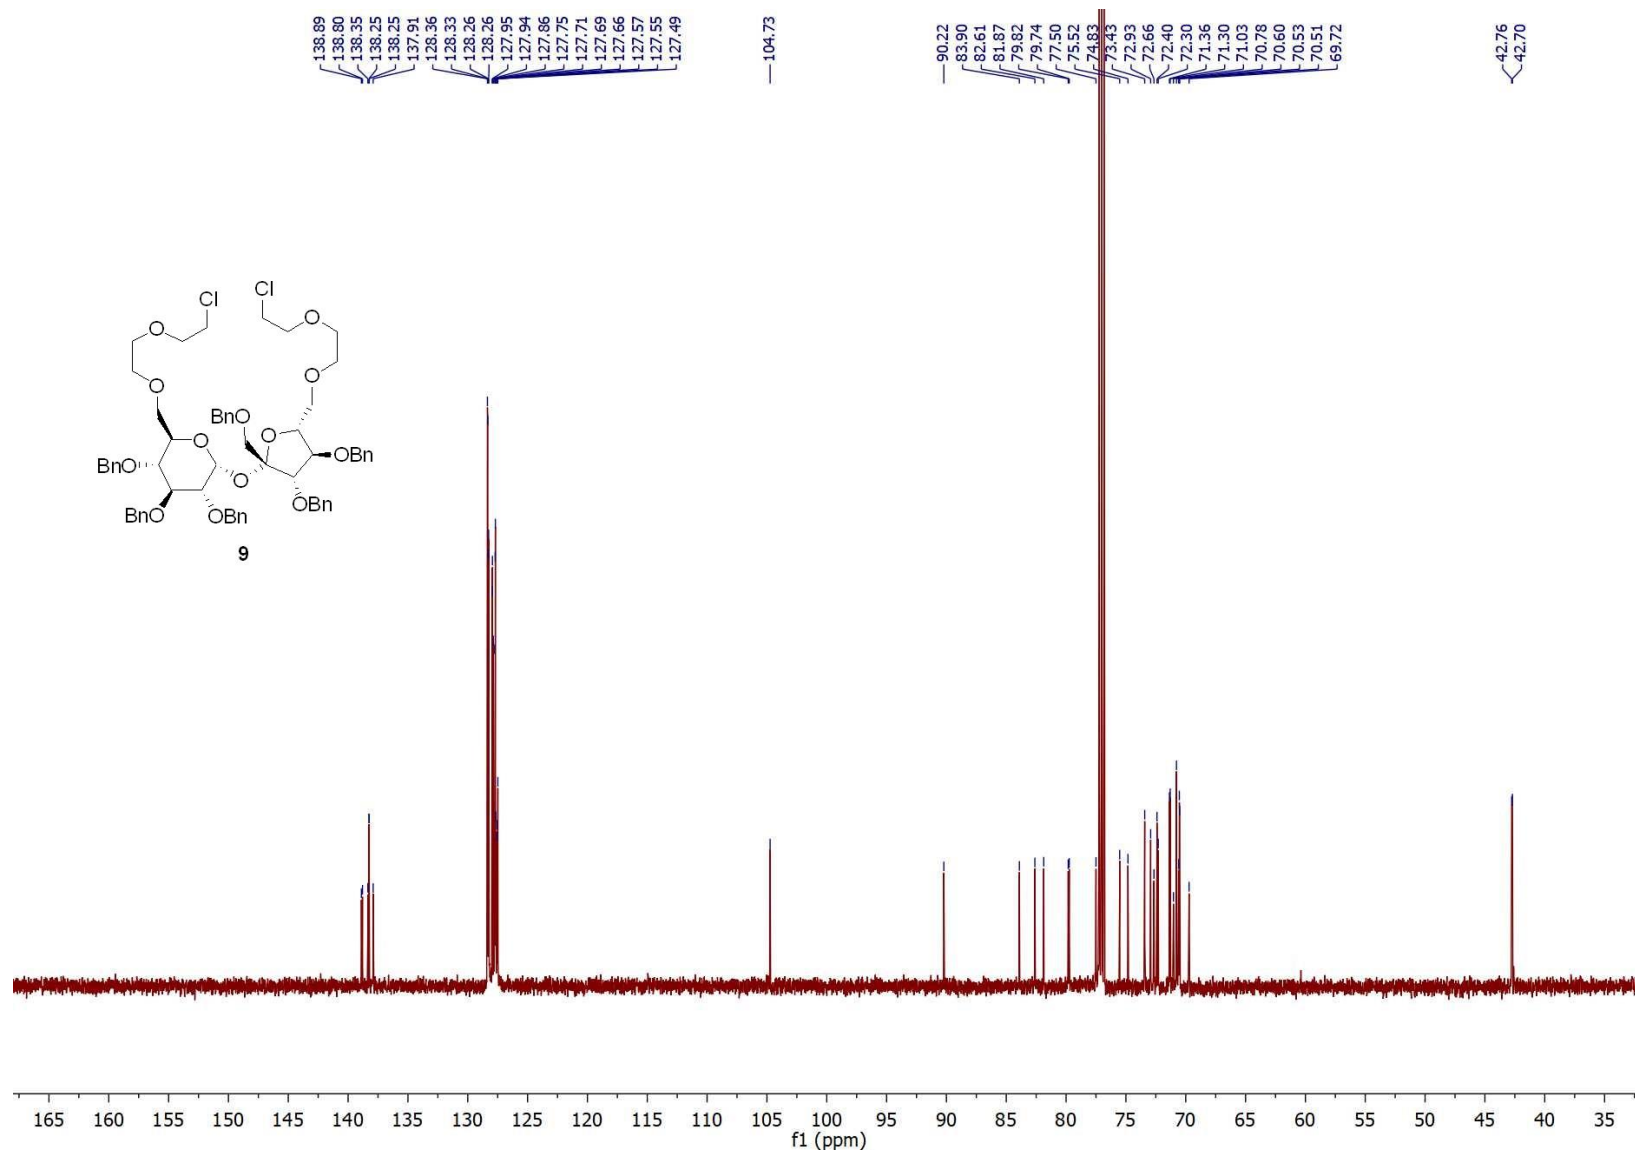

**Figure S2** <sup>13</sup>C NMR spectrum of compound **9** (CDCl<sub>3</sub>).

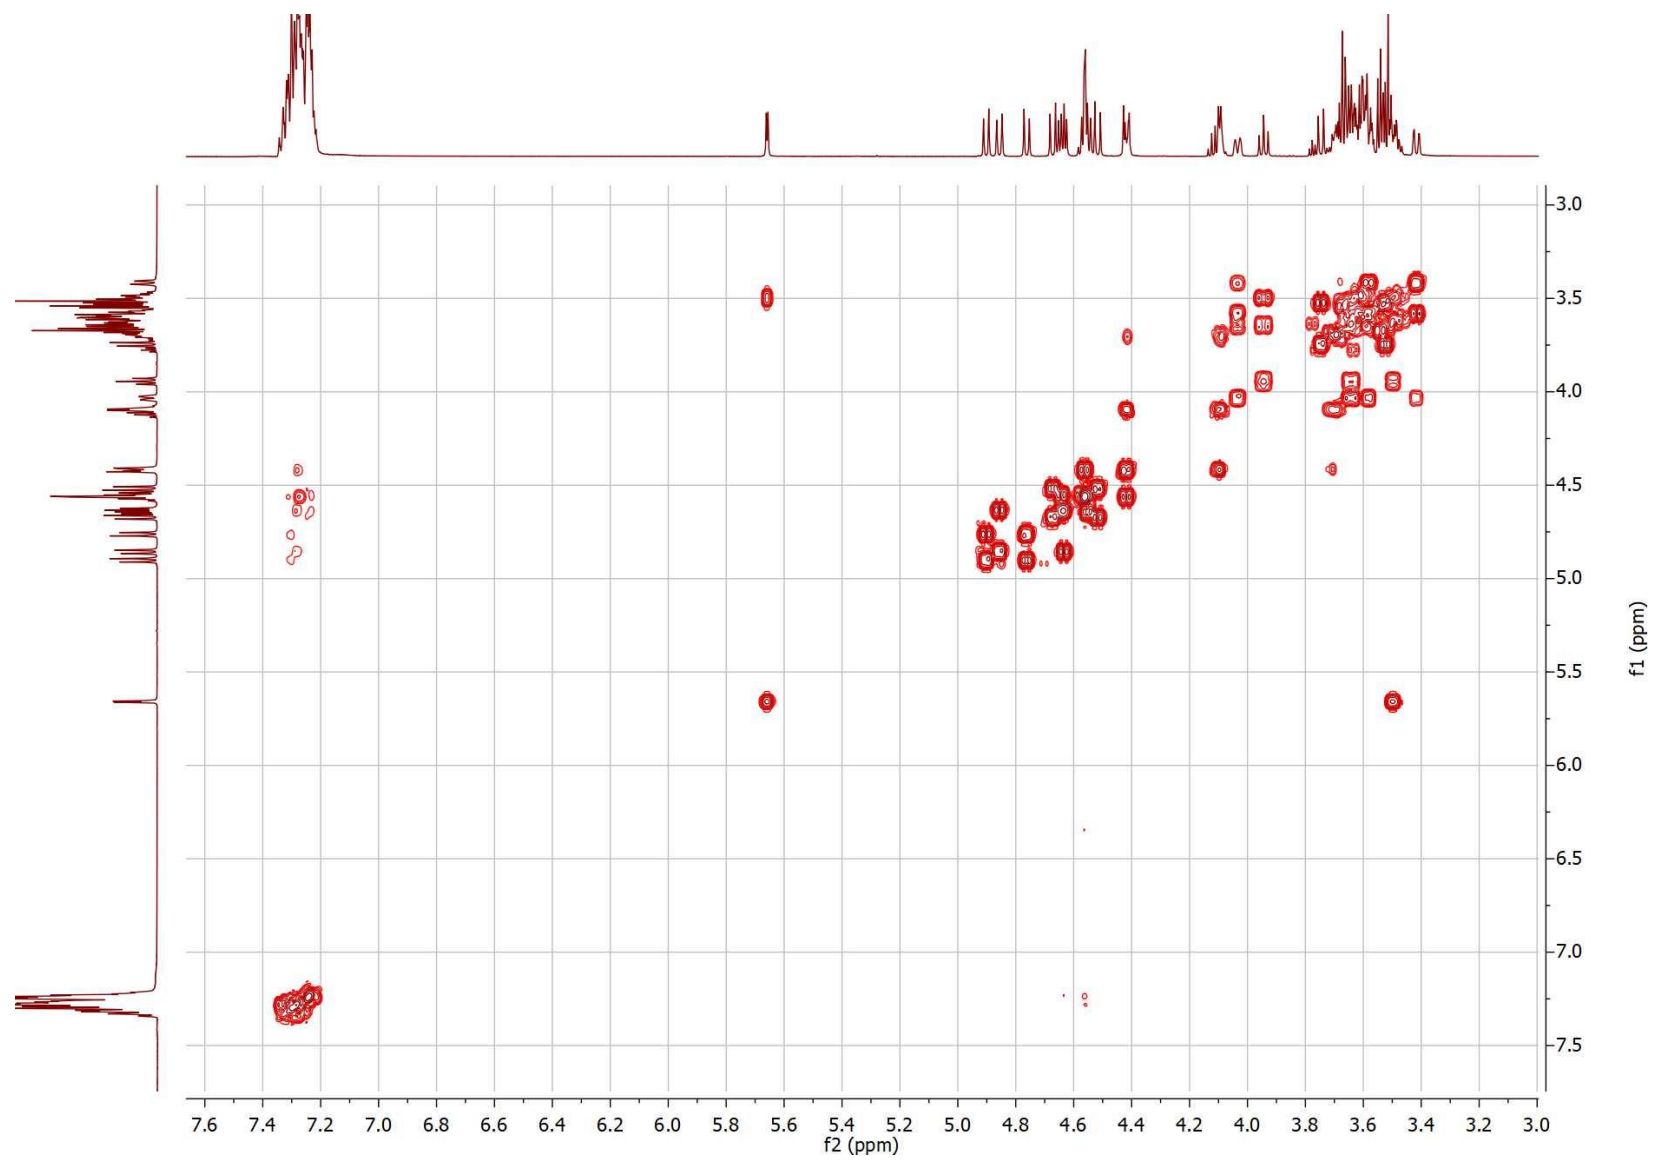

**Figure S3** gCOSY spectrum of compound **9**.

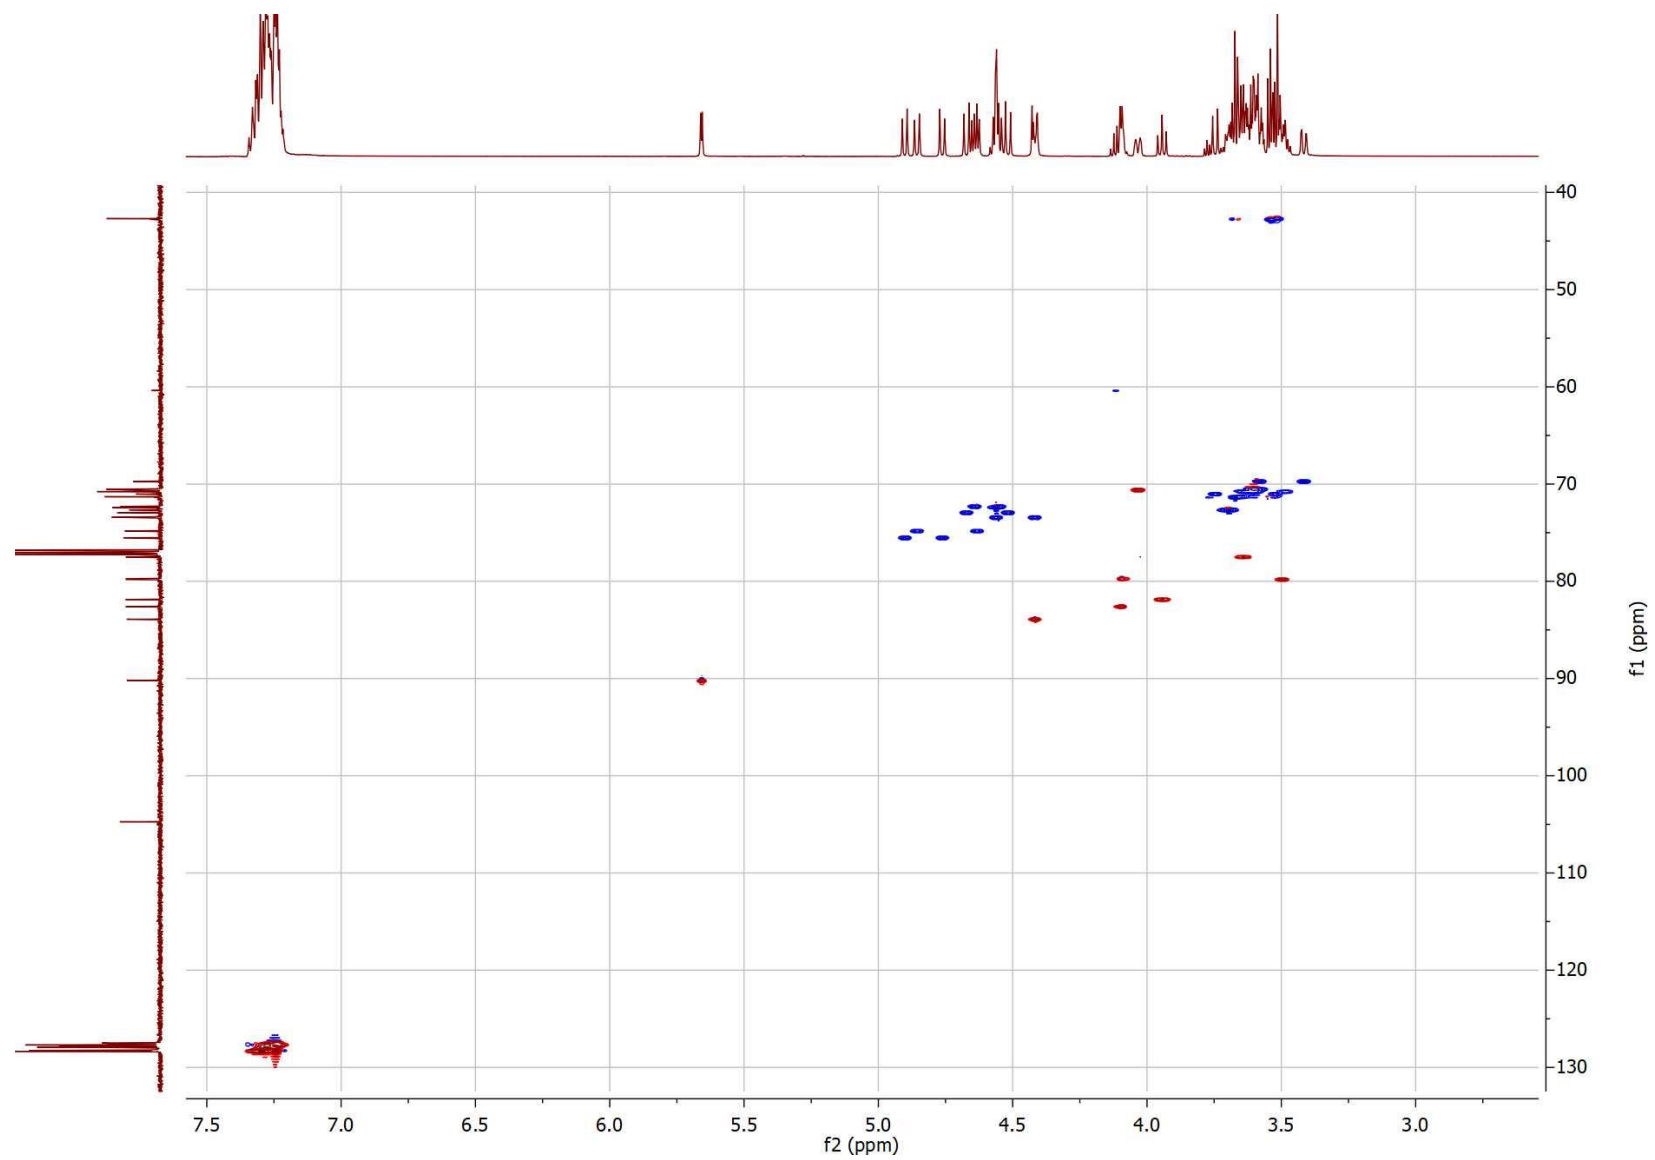

**Figure S4** gHSQCAD spectrum of compound **9**.

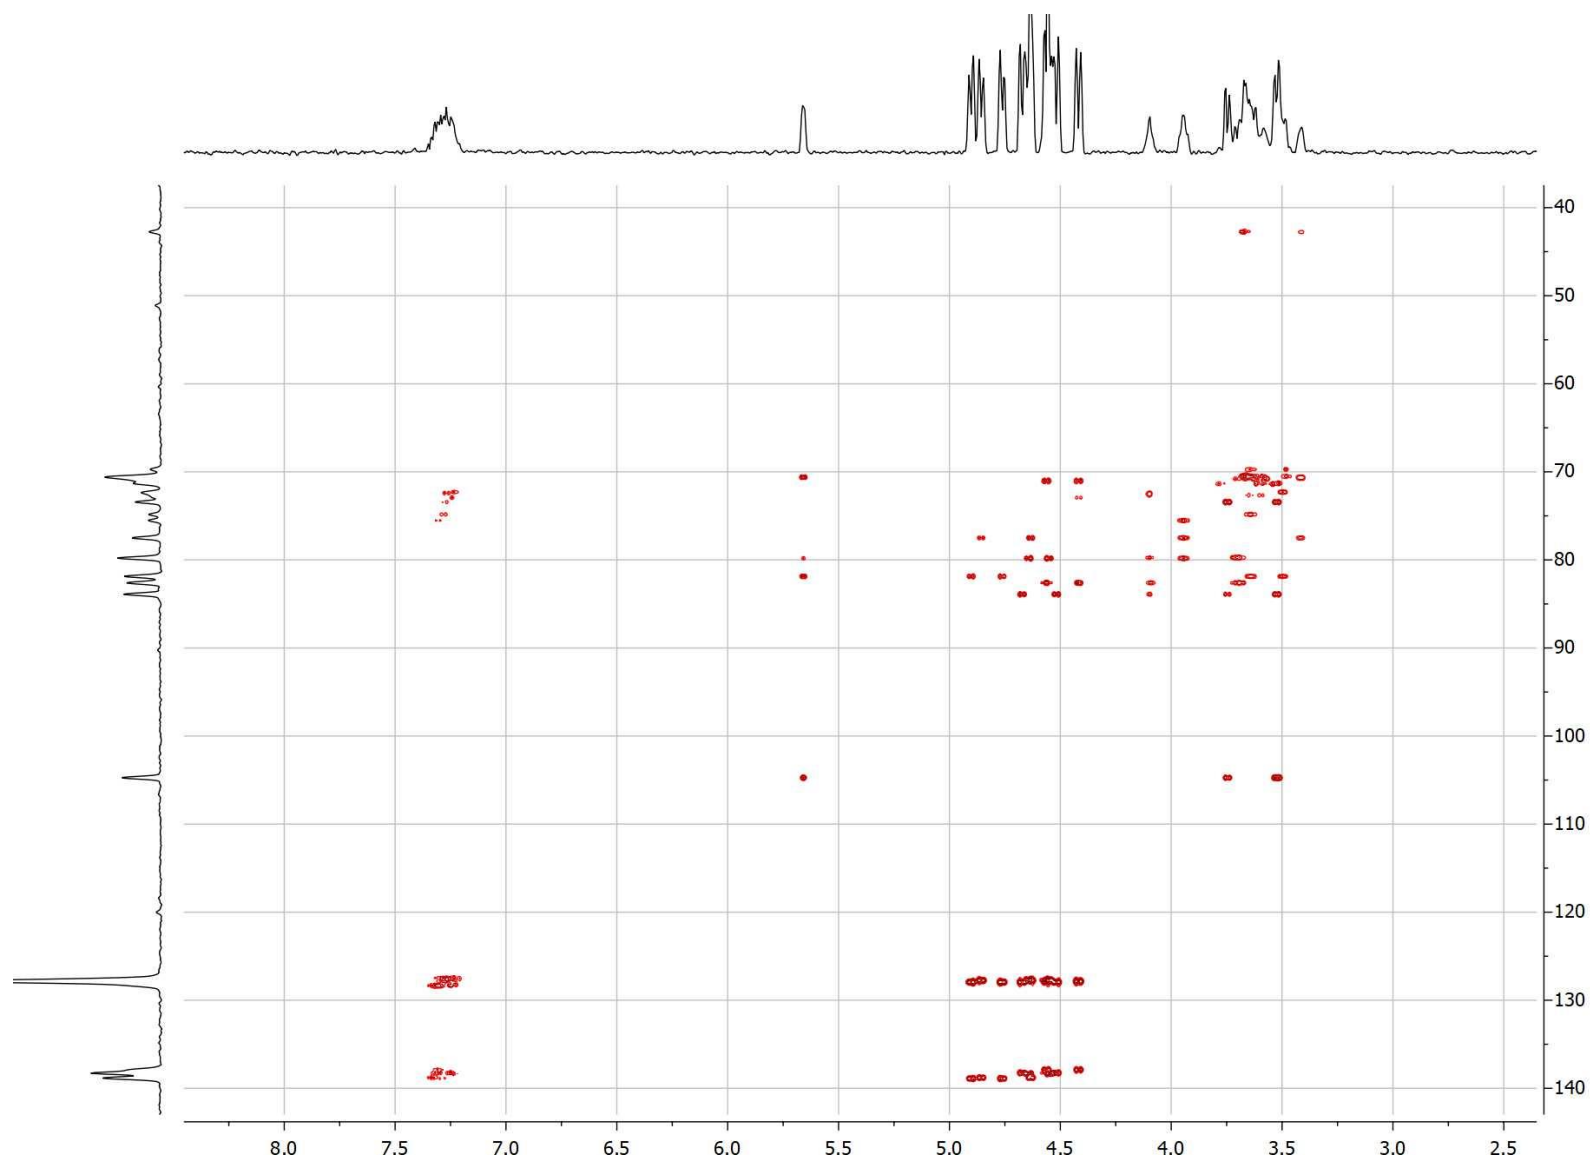

**Figure S5** gHMBCAD spectrum of compound **9**.

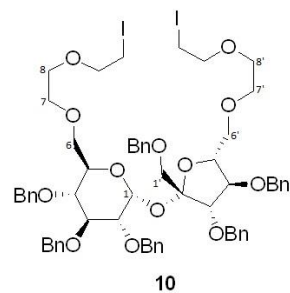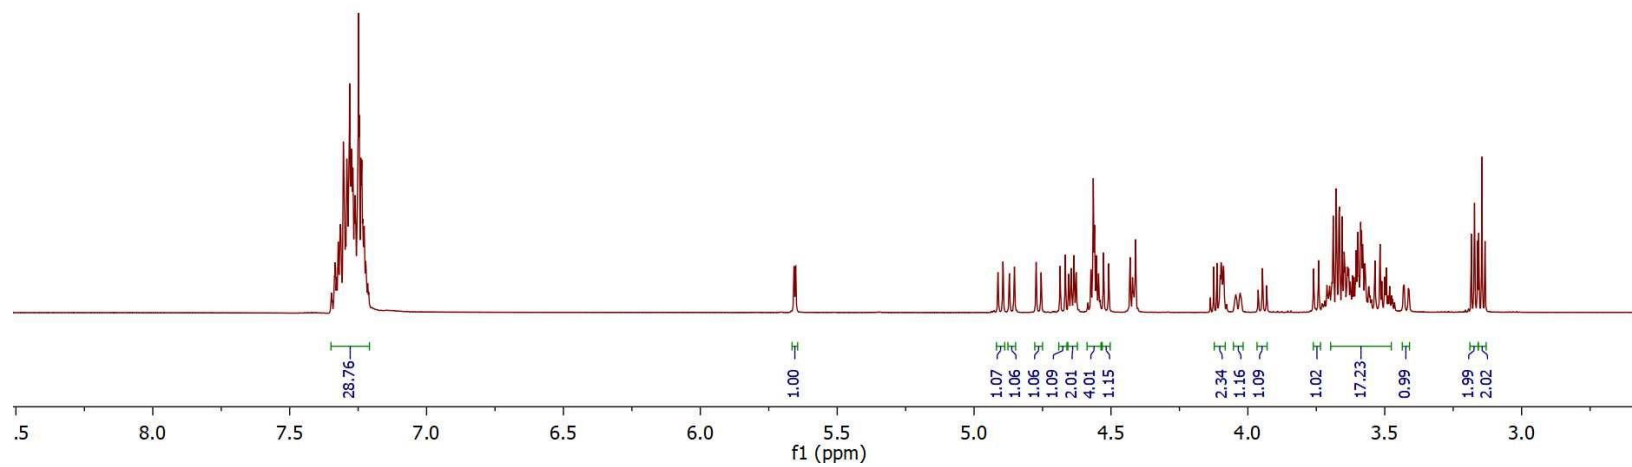

**Figure S6**  $^1\text{H}$  NMR spectrum of compound **10** ( $\text{CDCl}_3$ ).

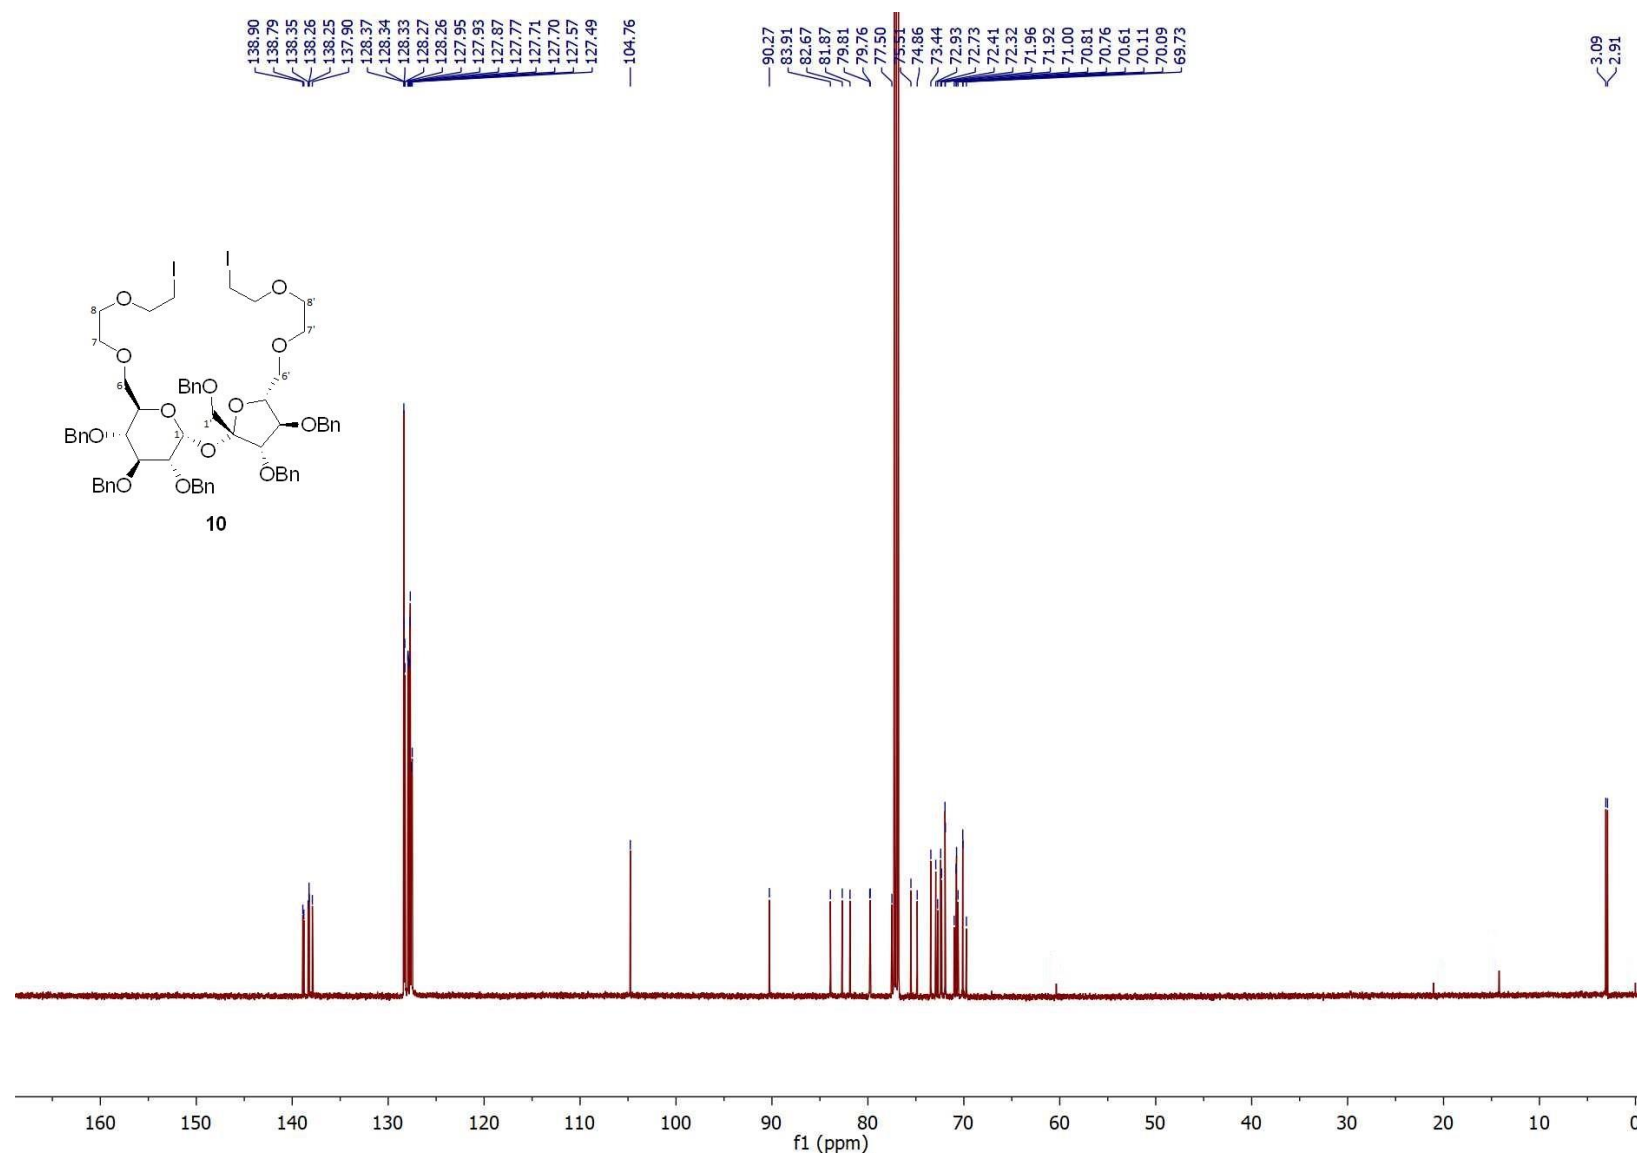

**Figure S7**  $^{13}\text{C}$  NMR spectrum of compound **10** (CDCl<sub>3</sub>).



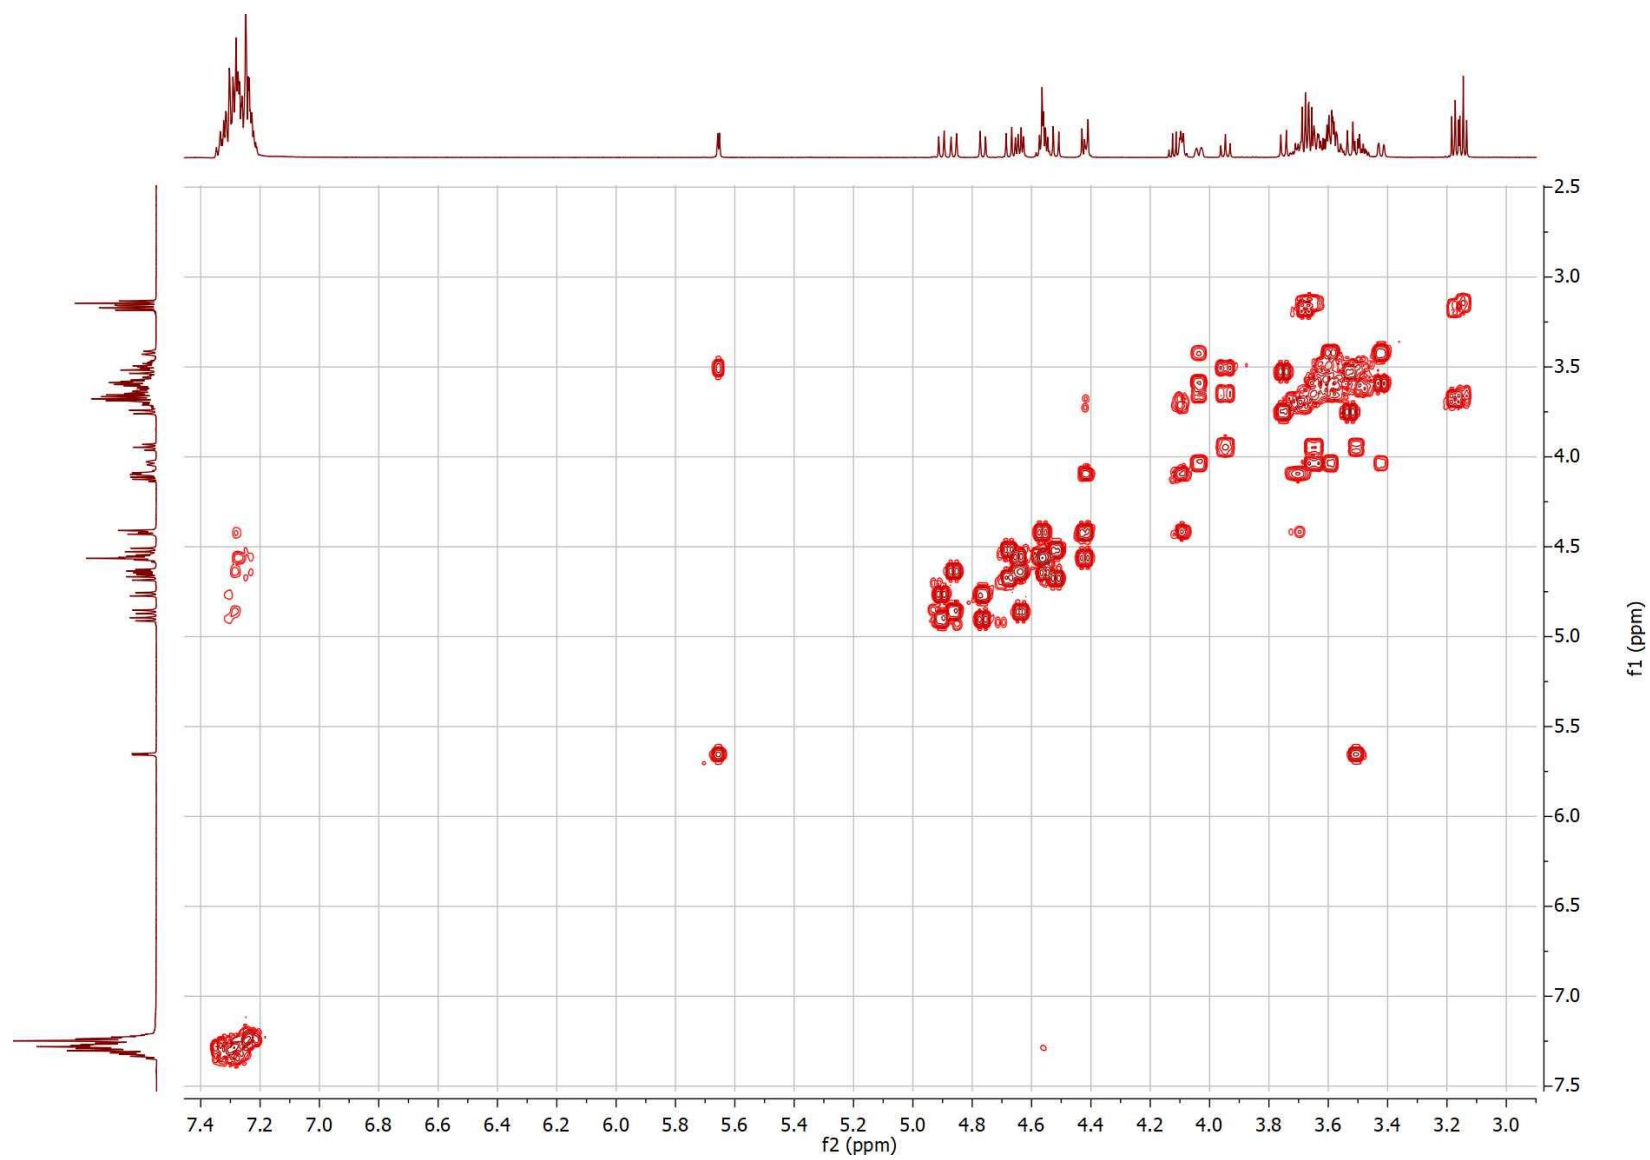

**Figure S8** gCOSY spectrum of compound **10**.

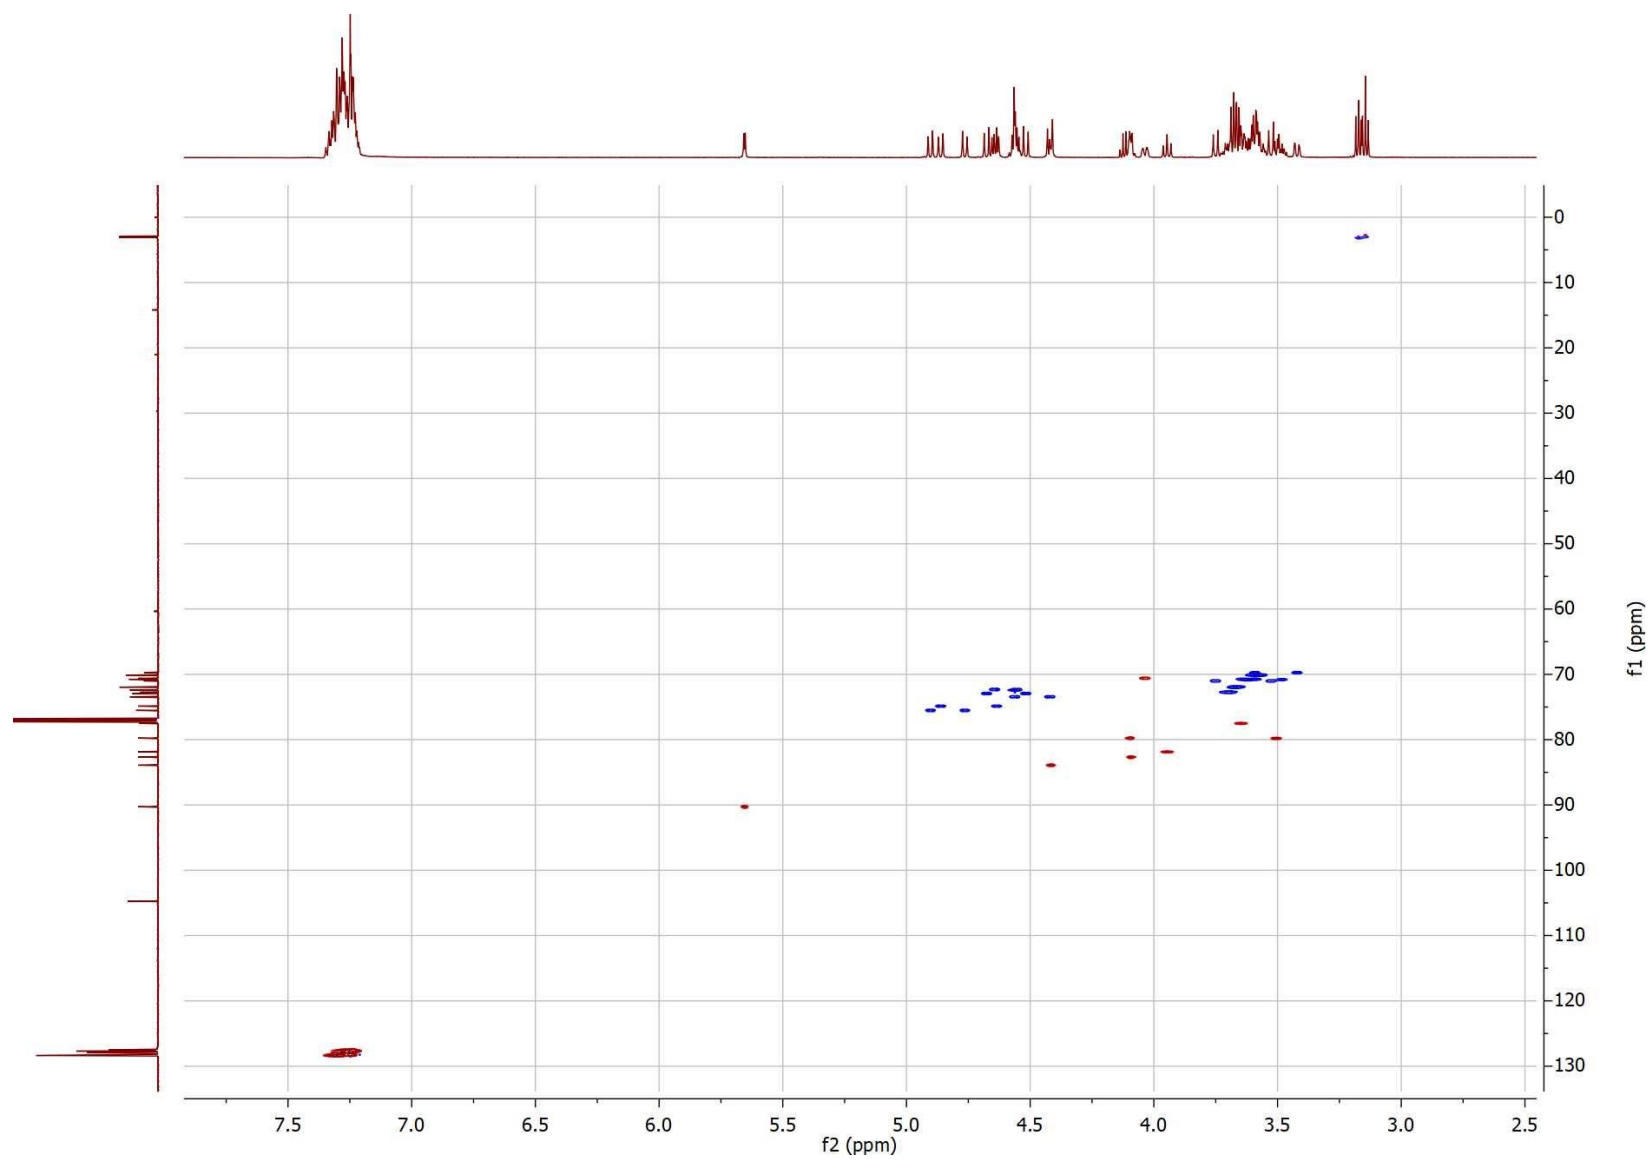

**Figure S9** gHSQCAD spectrum of compound **10**

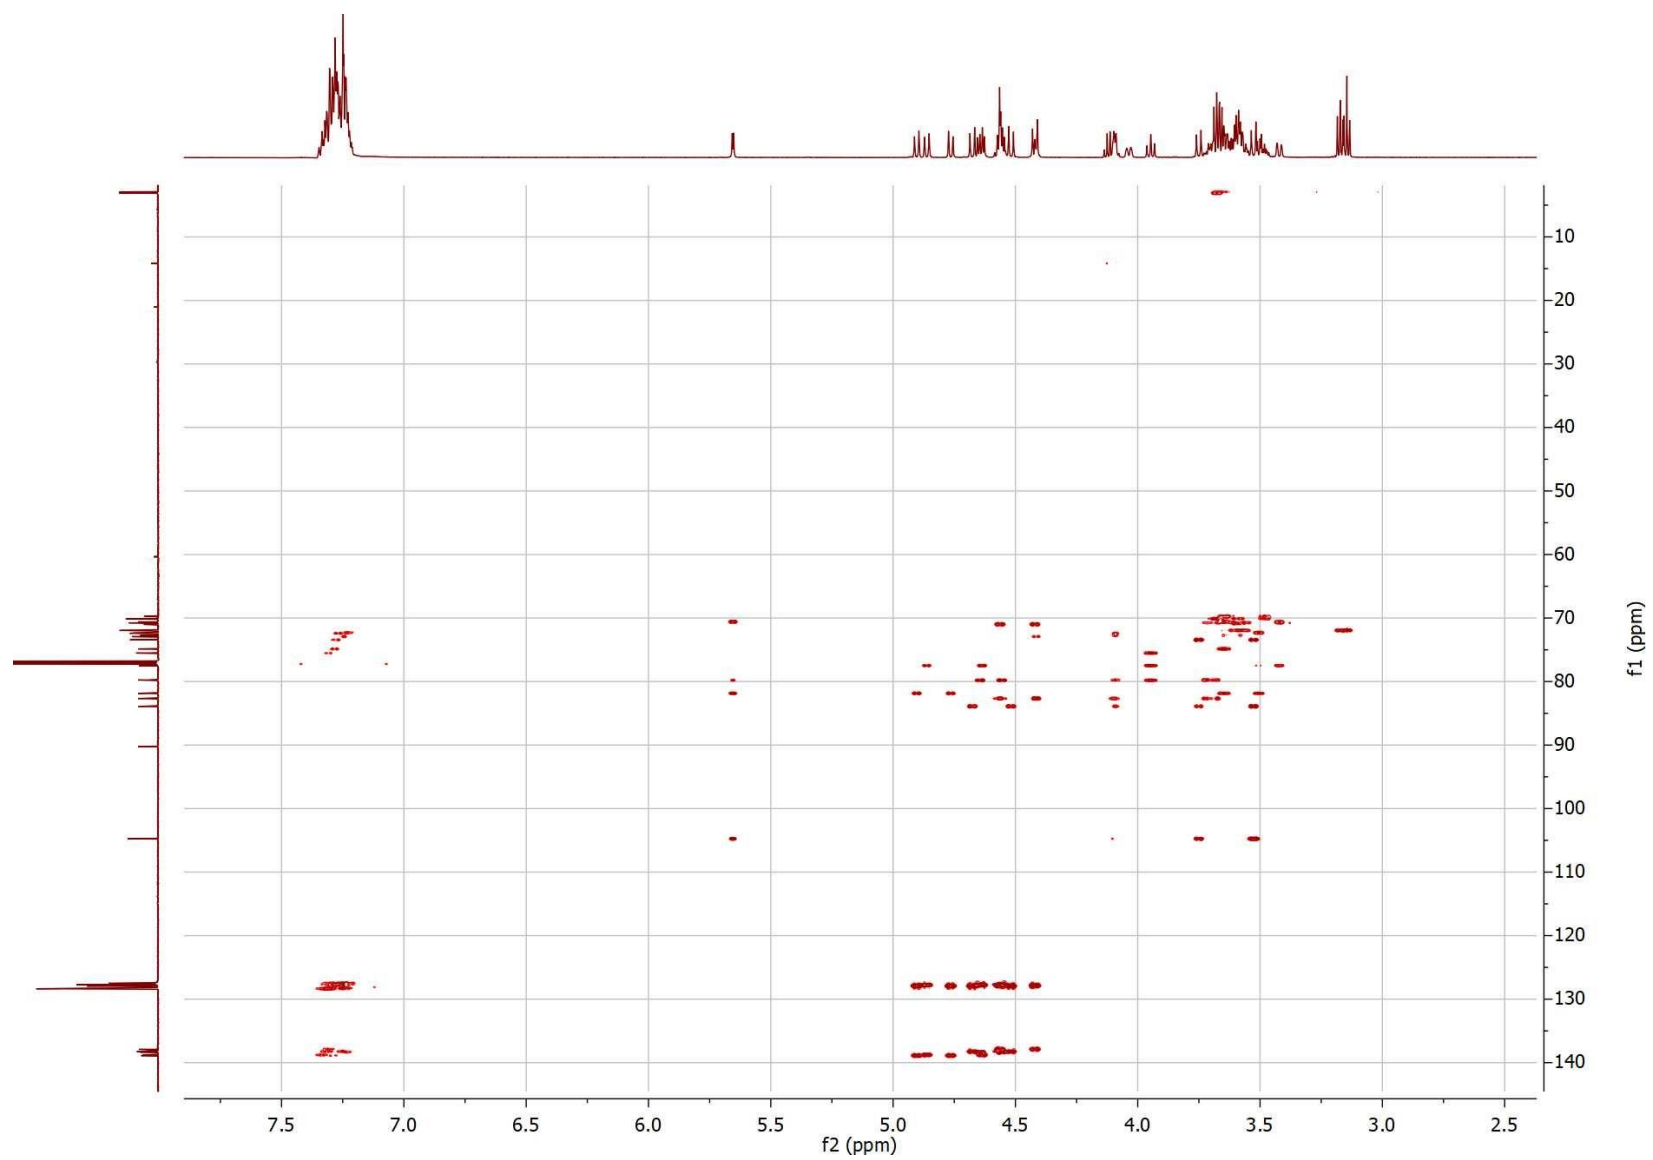

**Figure S10** gHMBCAD spectrum of compound **10**.

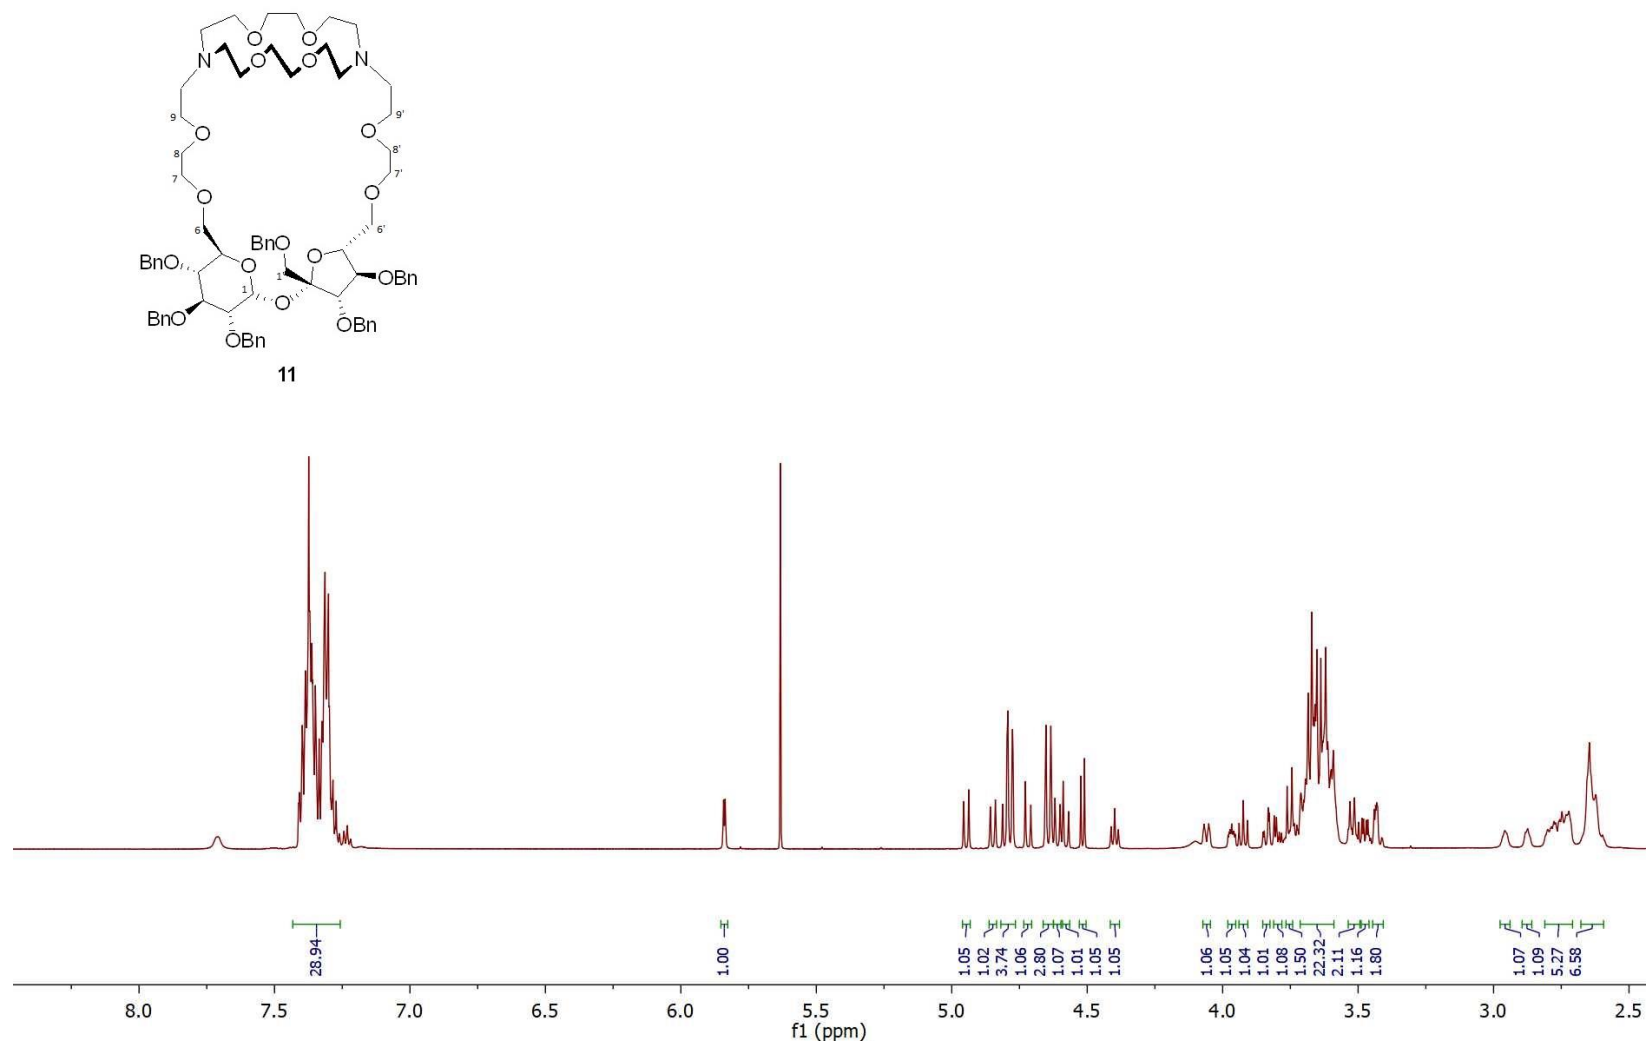

**Figure S11**  $^1\text{H}$  NMR spectrum of compound **11** (acetone- $d_6$ ).

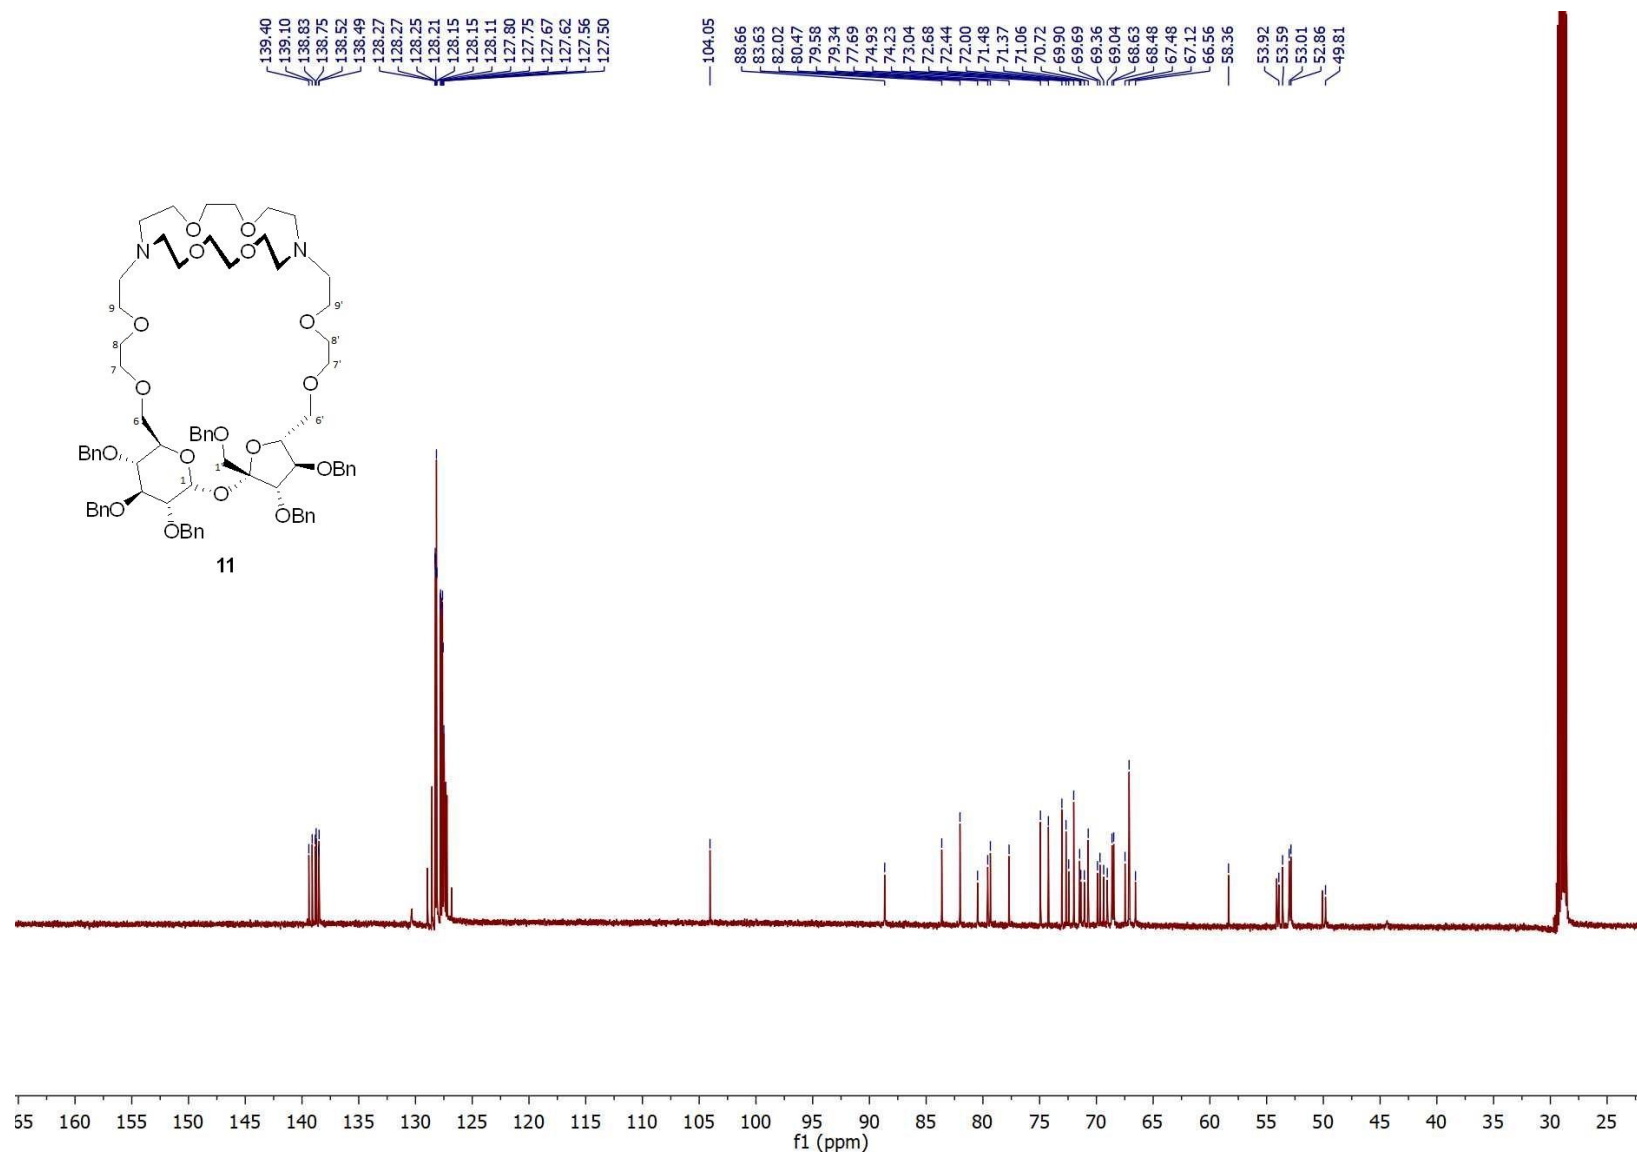

**Figure S12**  $^{13}\text{C}$  NMR spectrum of compound **11** (acetone- $d_6$ ).

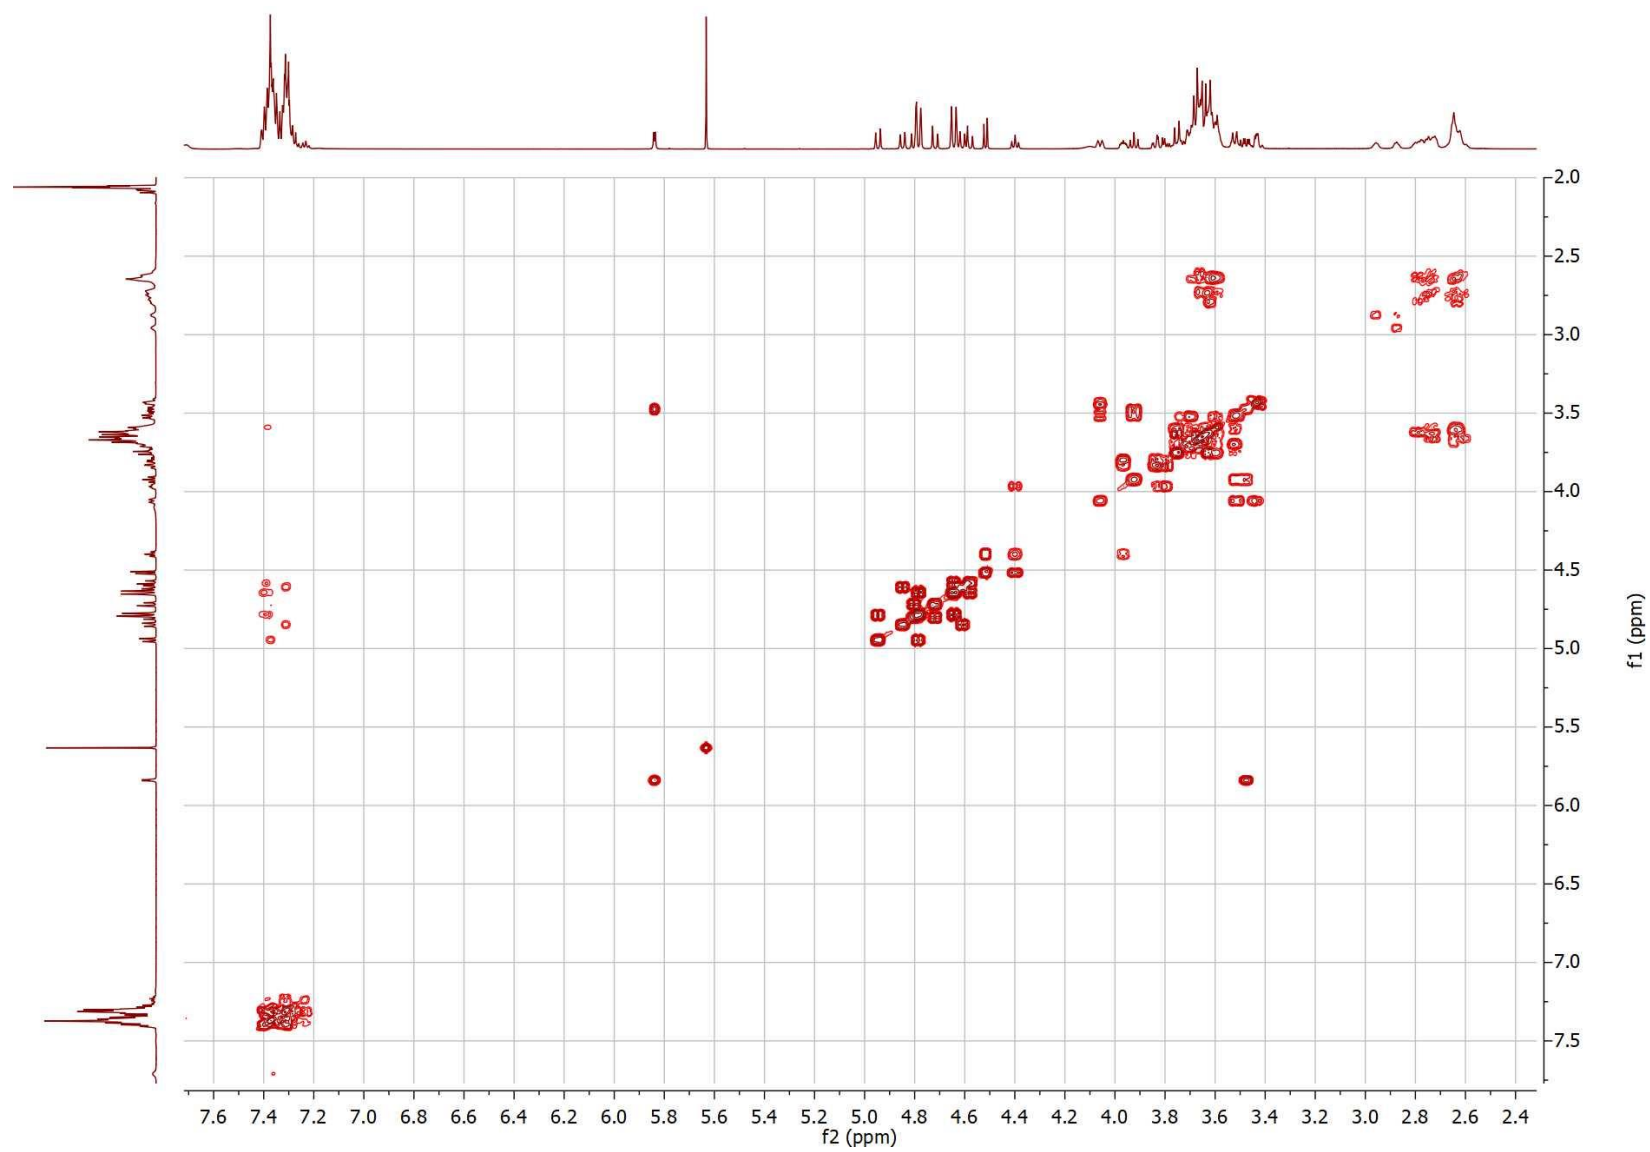

**Figure S13** gCOSY spectrum of compound **11**.

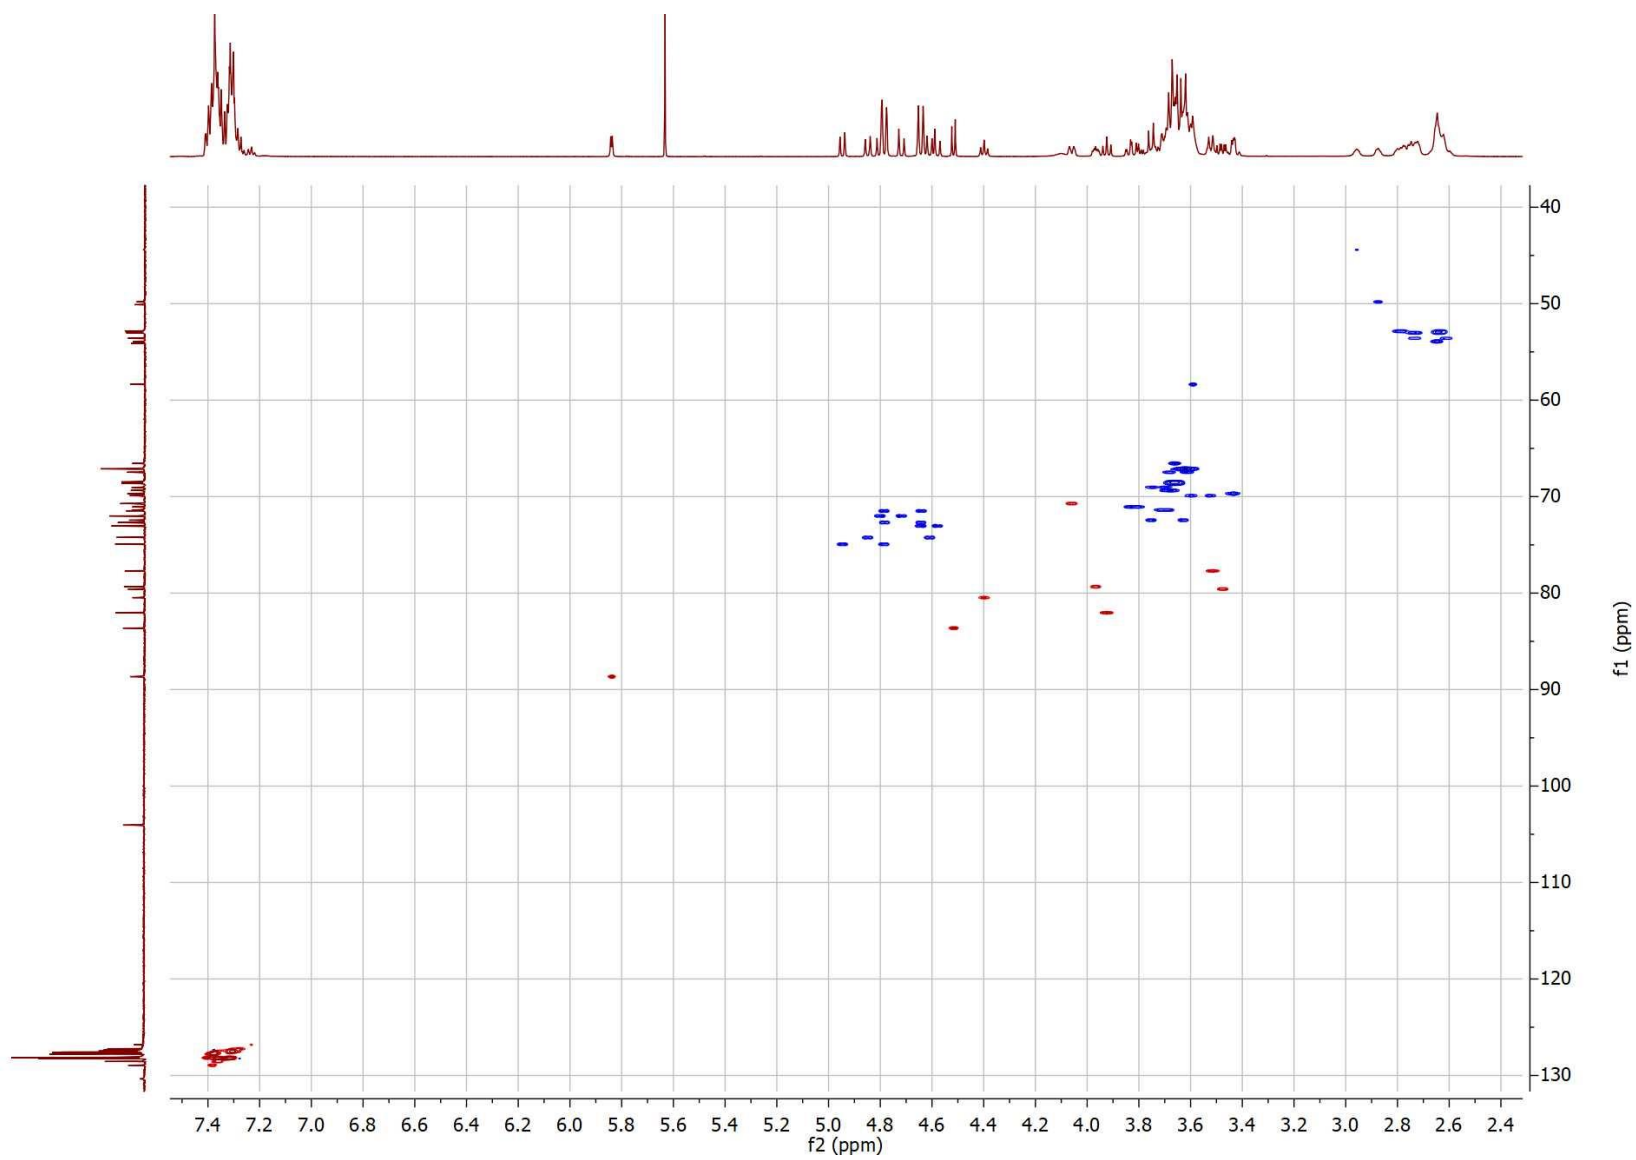

**Figure S14** gHSQCAD spectrum of compound **11**.

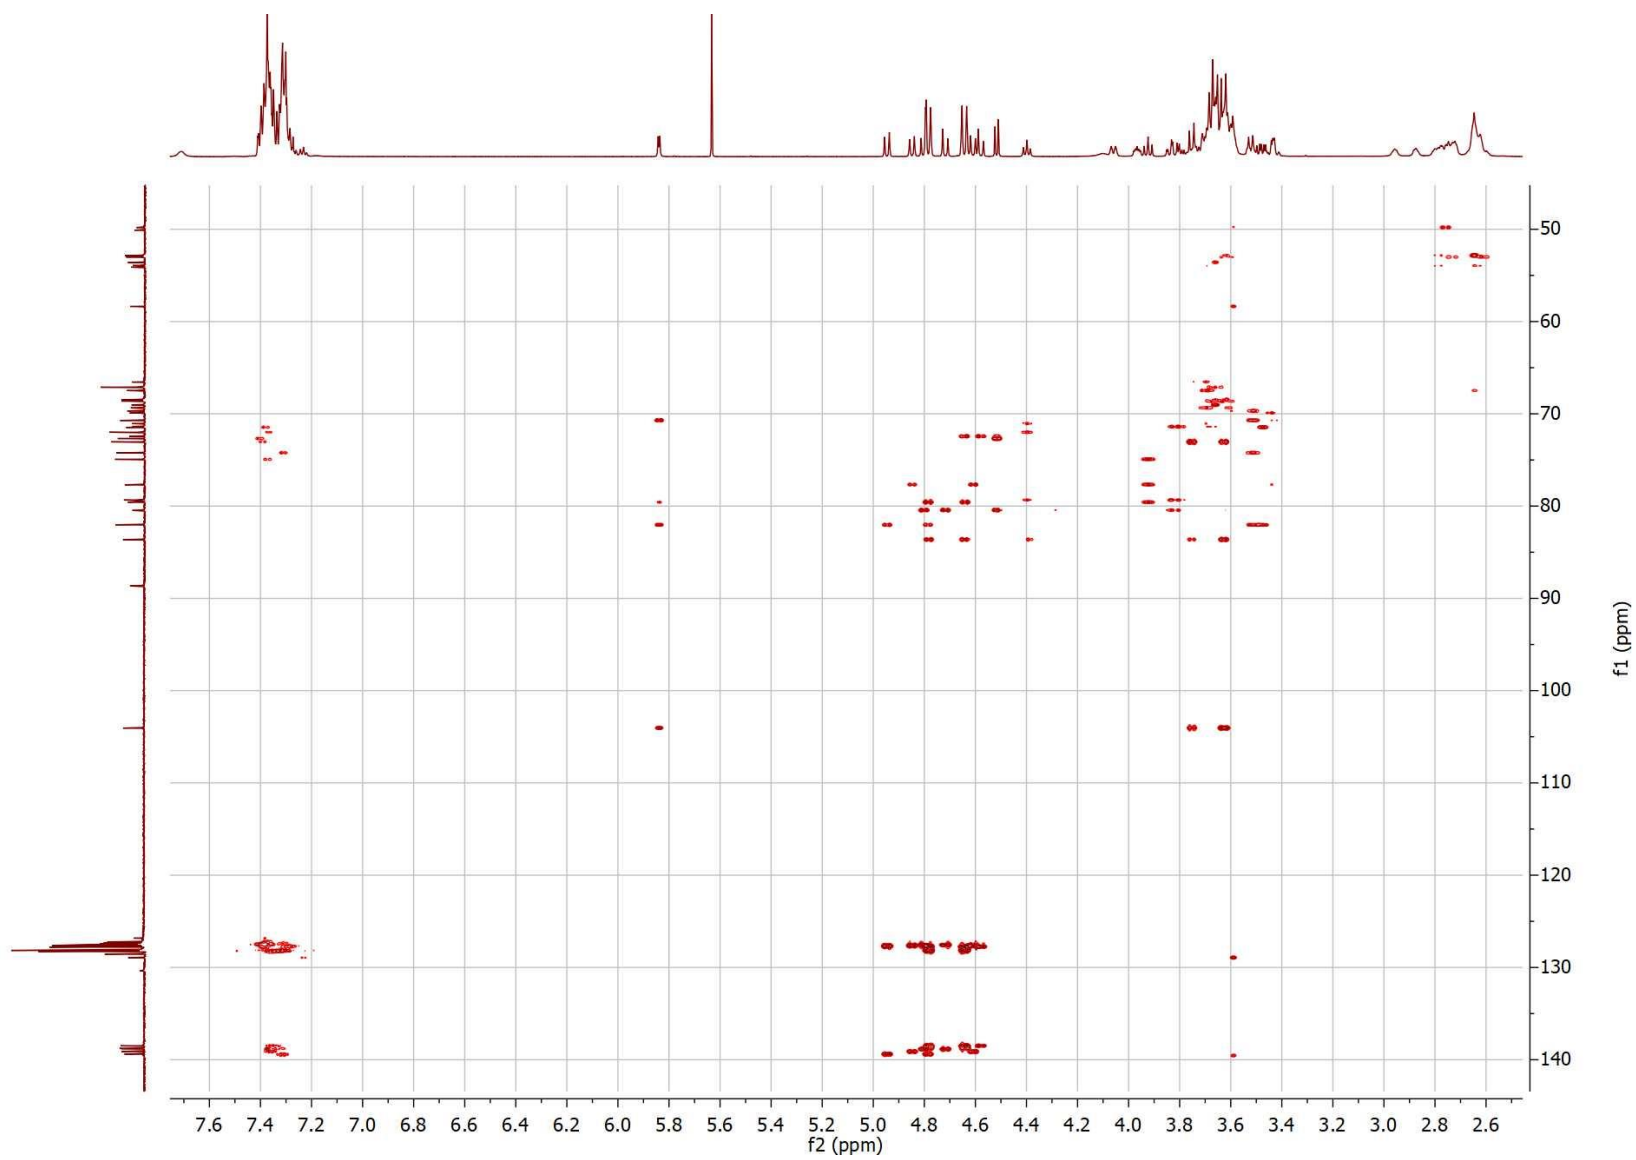

**Figure S15** gHMBCAD spectrum of compound **11**.



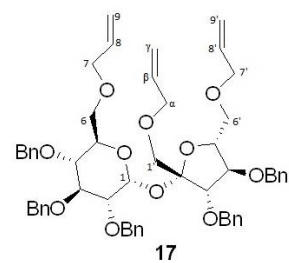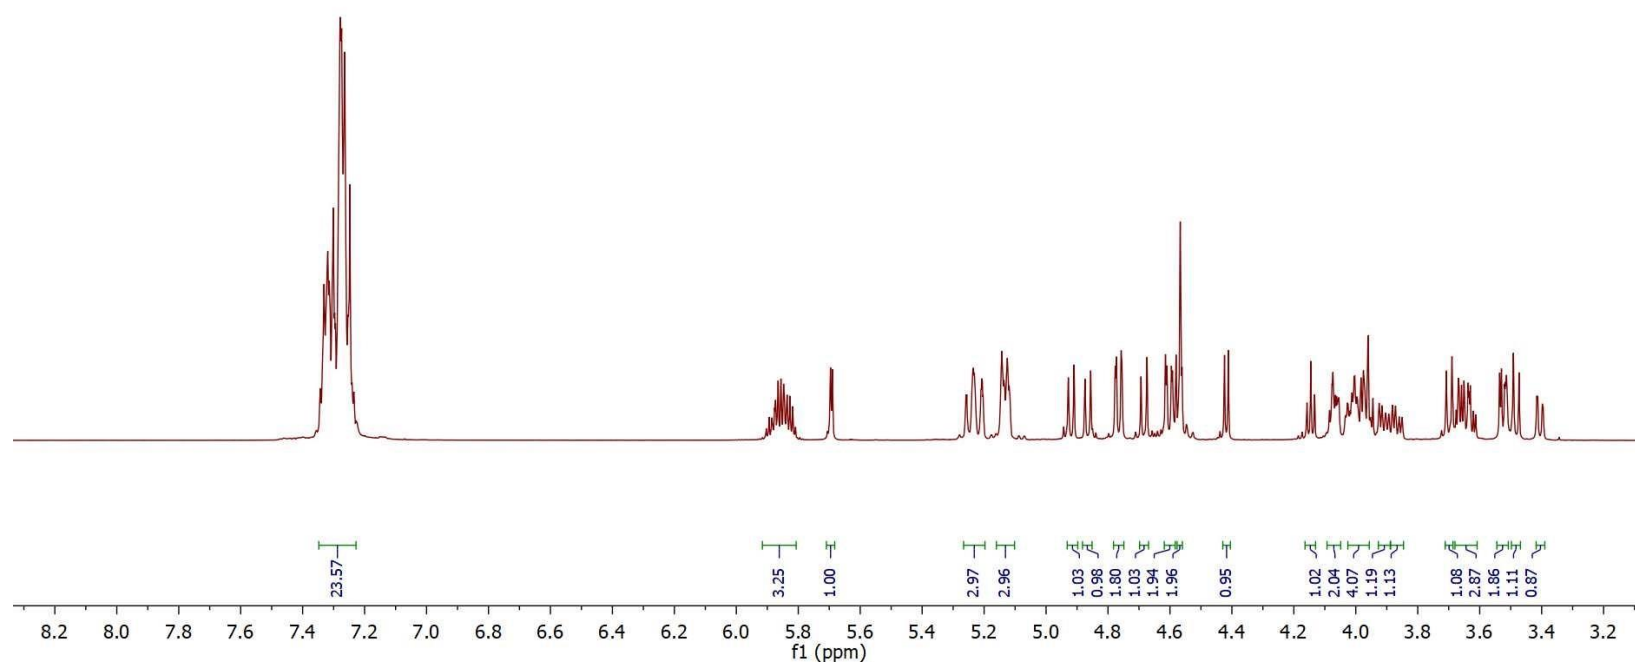

**Figure S16**  $^1\text{H}$  NMR spectrum of compound **17** ( $\text{CDCl}_3$ ).

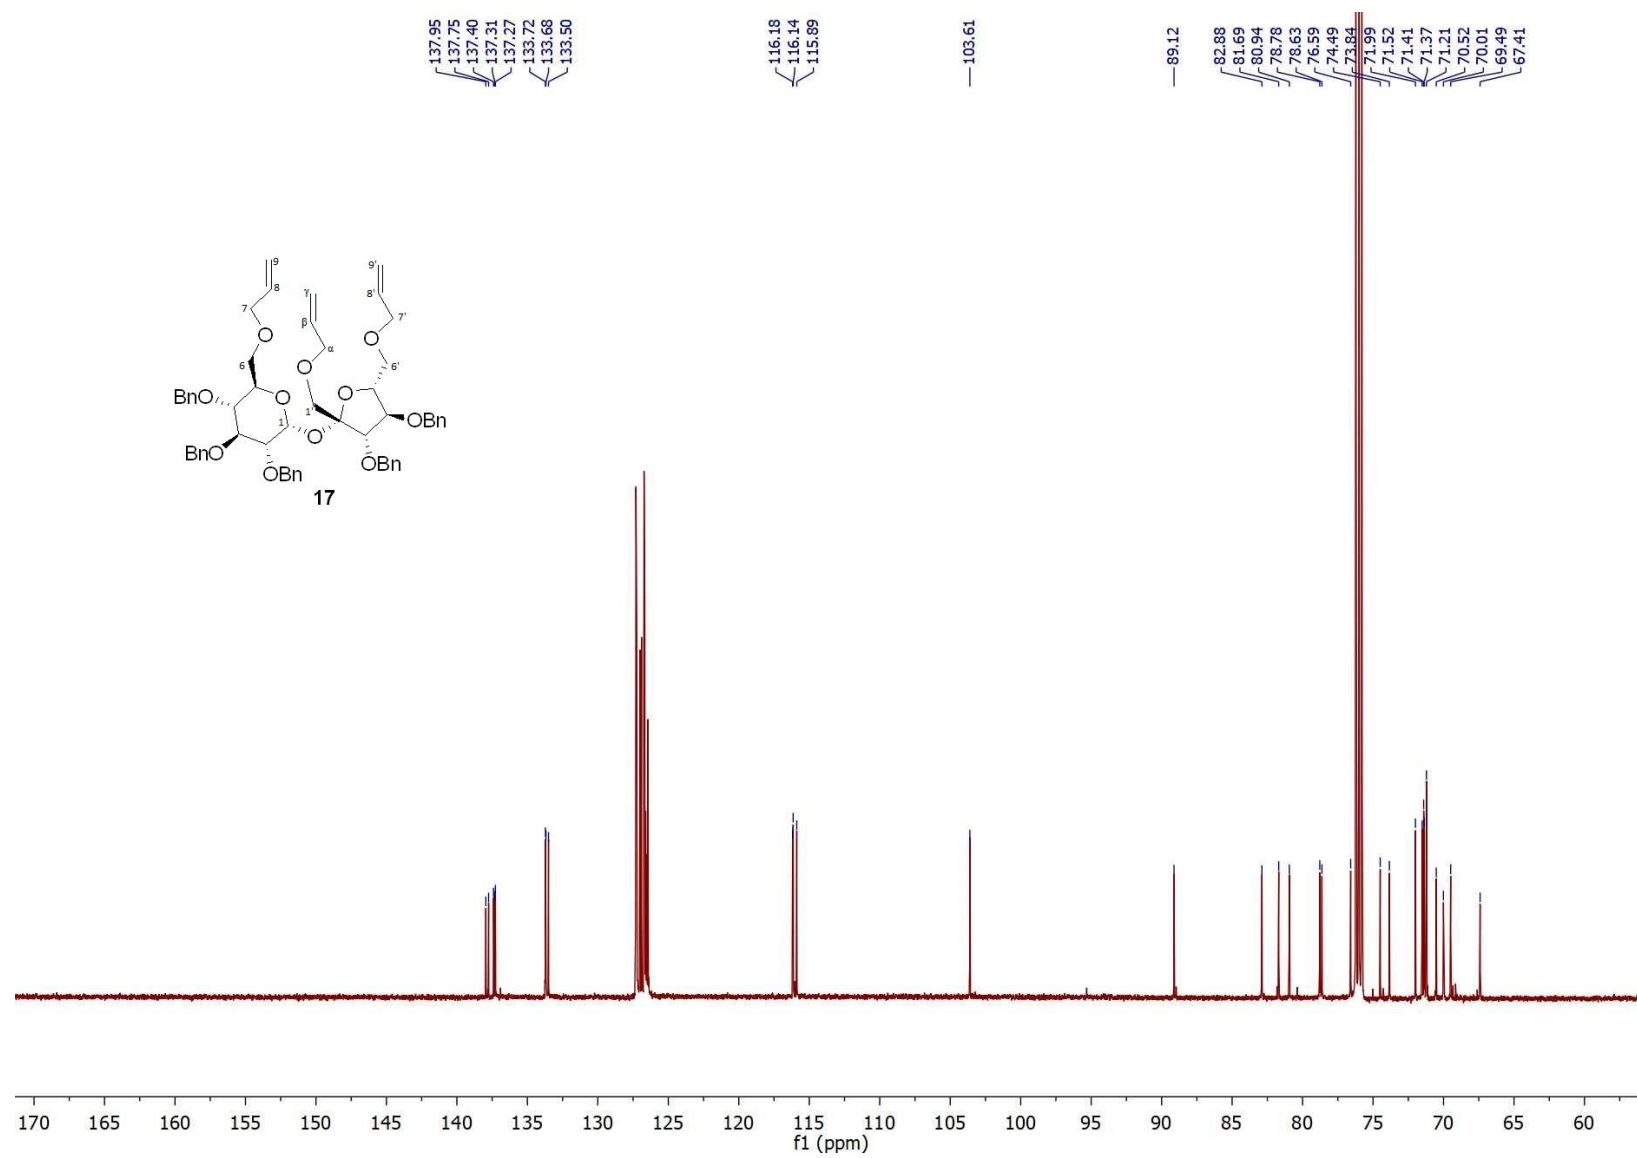

**Figure S17**  $^{13}\text{C}$  NMR spectrum of compound **17** ( $\text{CDCl}_3$ ).

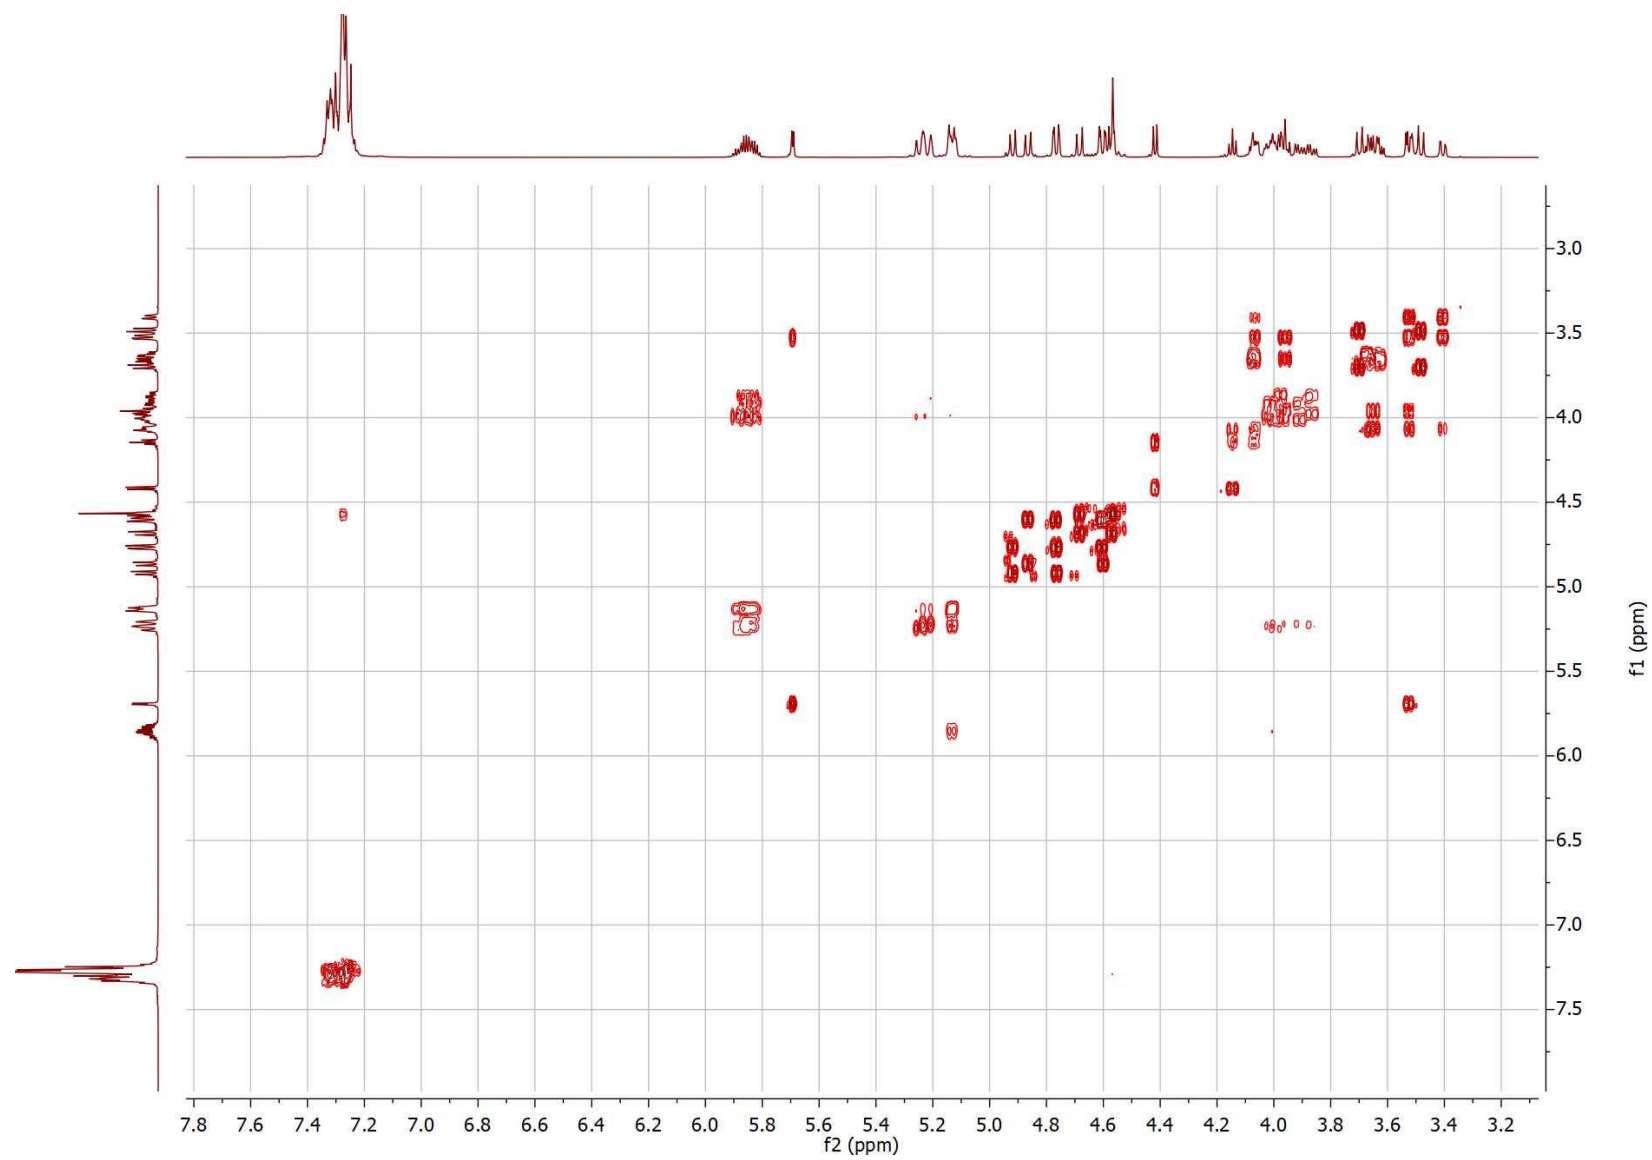

**Figure S18** gCOSY spectrum of compound **17**.

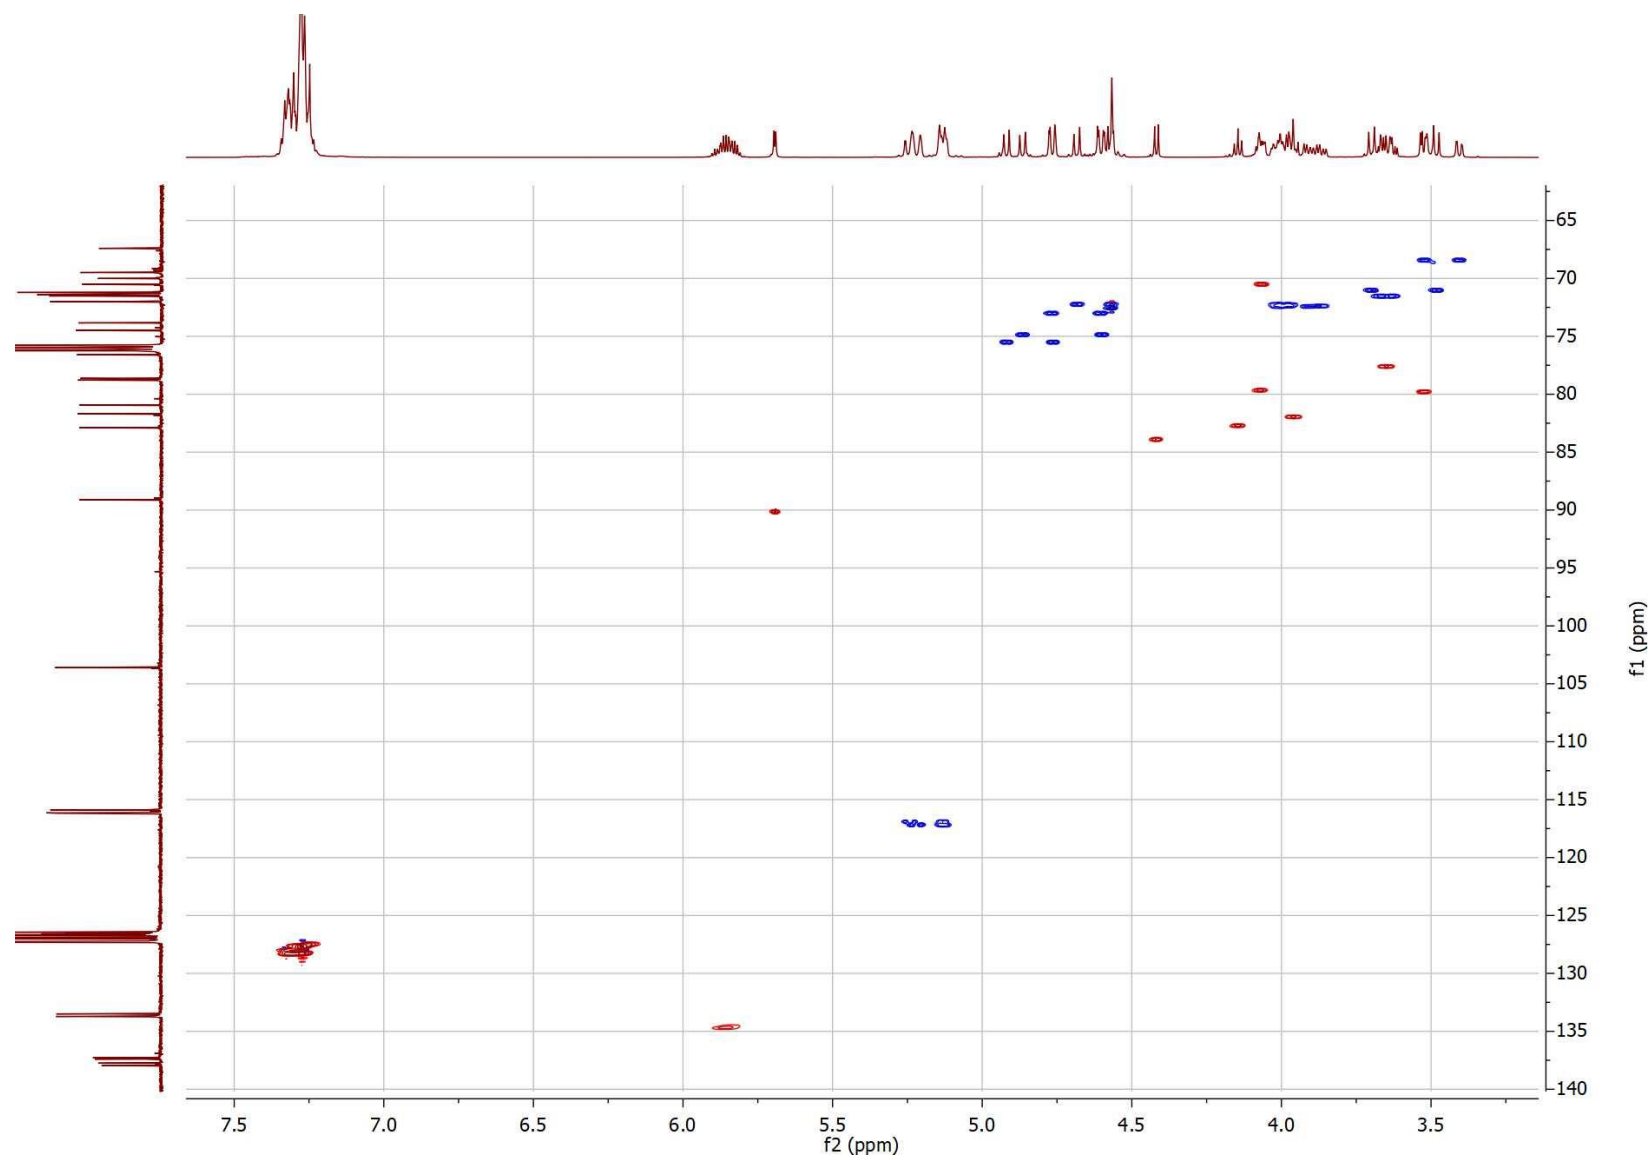

**Figure S19** gHSQCAD spectrum of compound **17**.

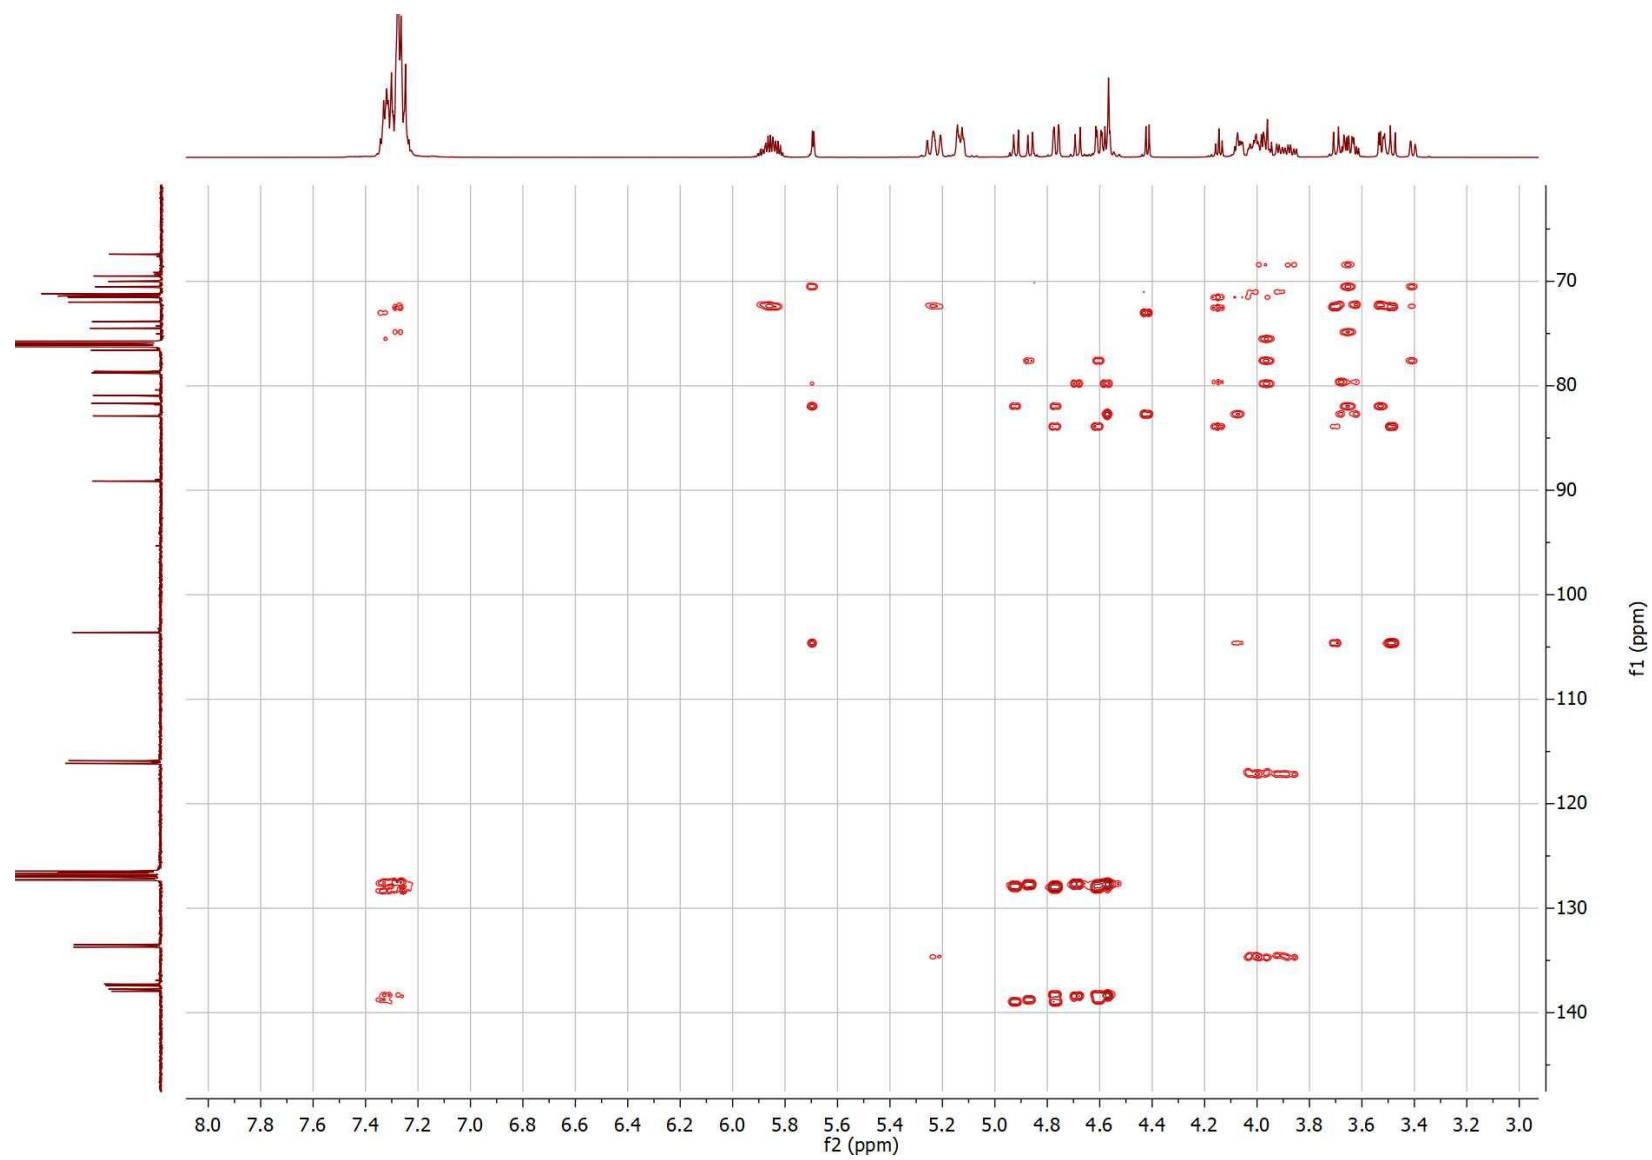

**Figure S20** gHMBCAD spectrum of compound **17**.

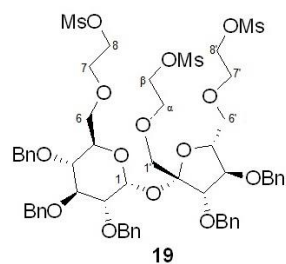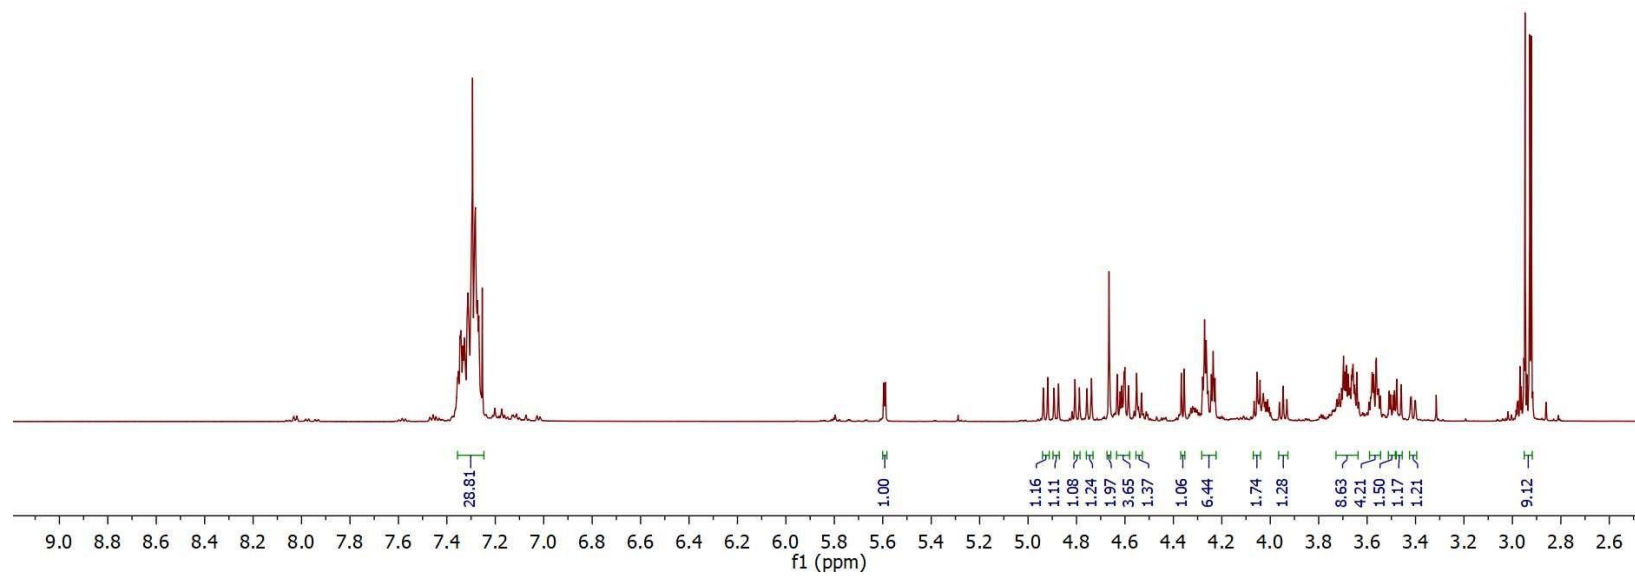

**Figure S21**  $^1\text{H}$  NMR spectrum of compound **19** ( $\text{CDCl}_3$ ).

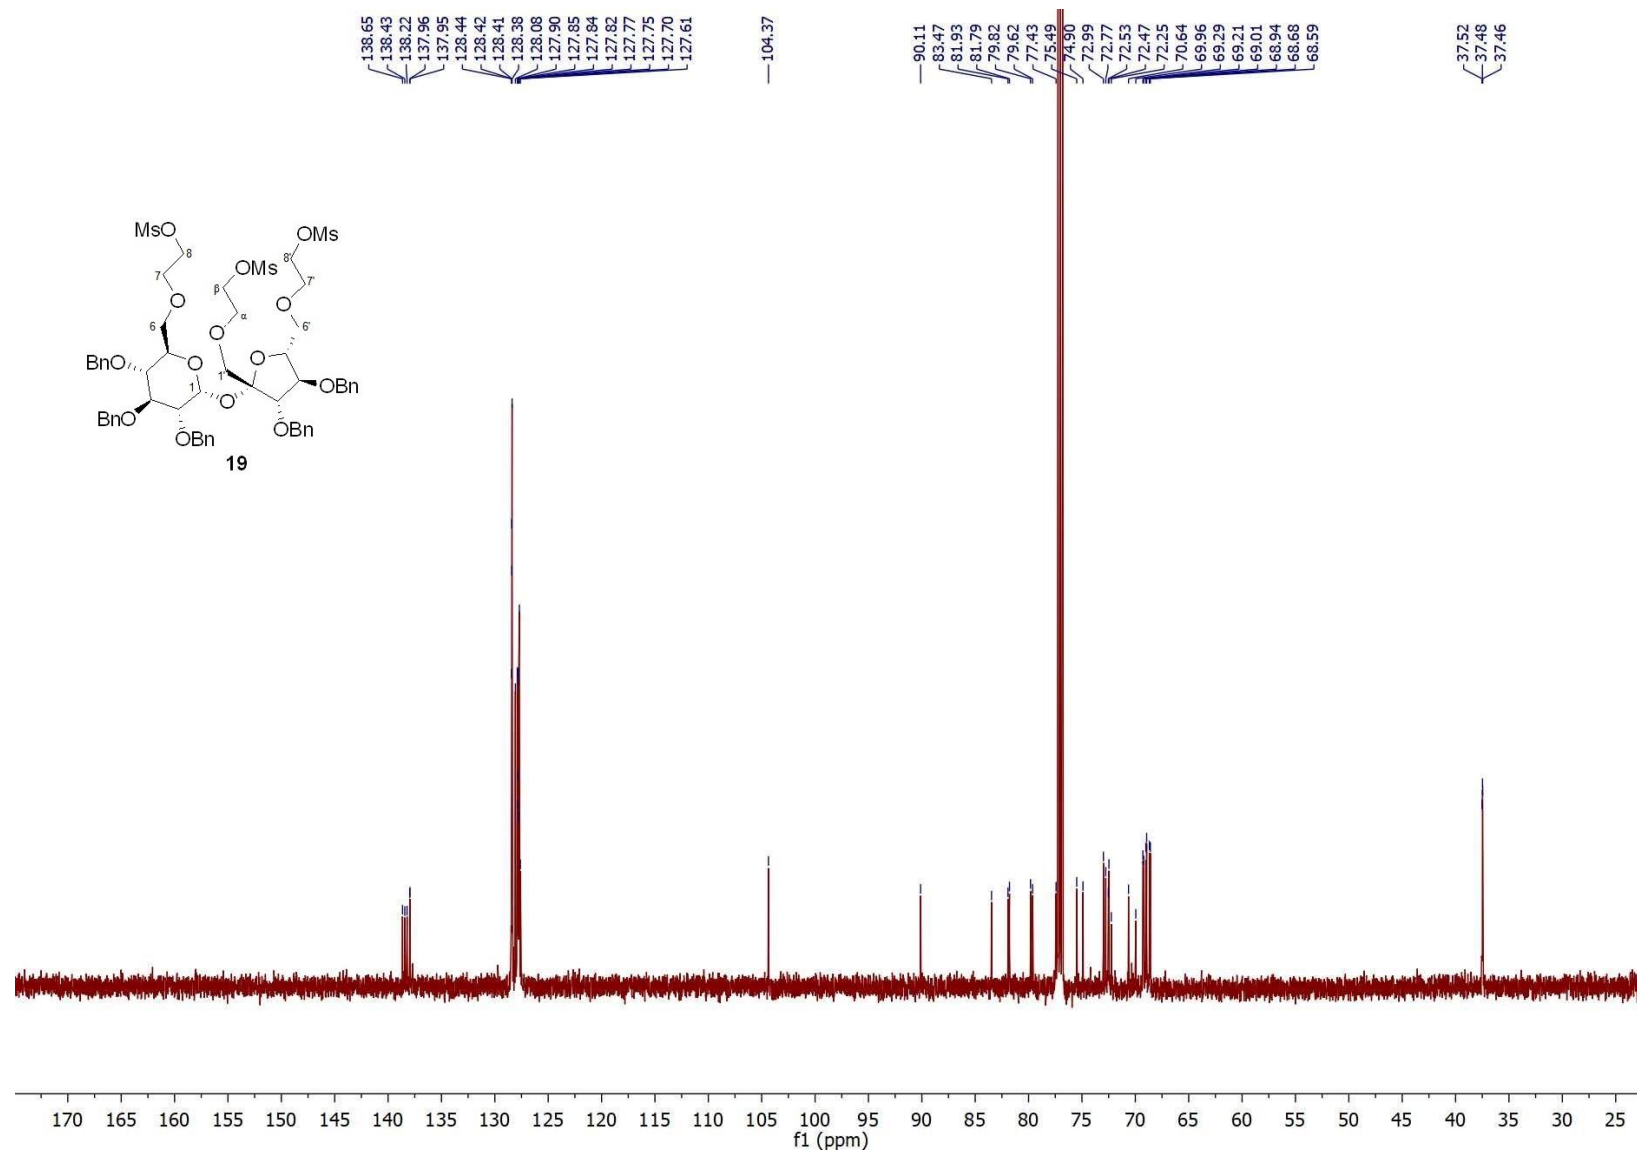

**Figure S22**  $^{13}\text{C}$  NMR spectrum of compound **19** (CDCl<sub>3</sub>).





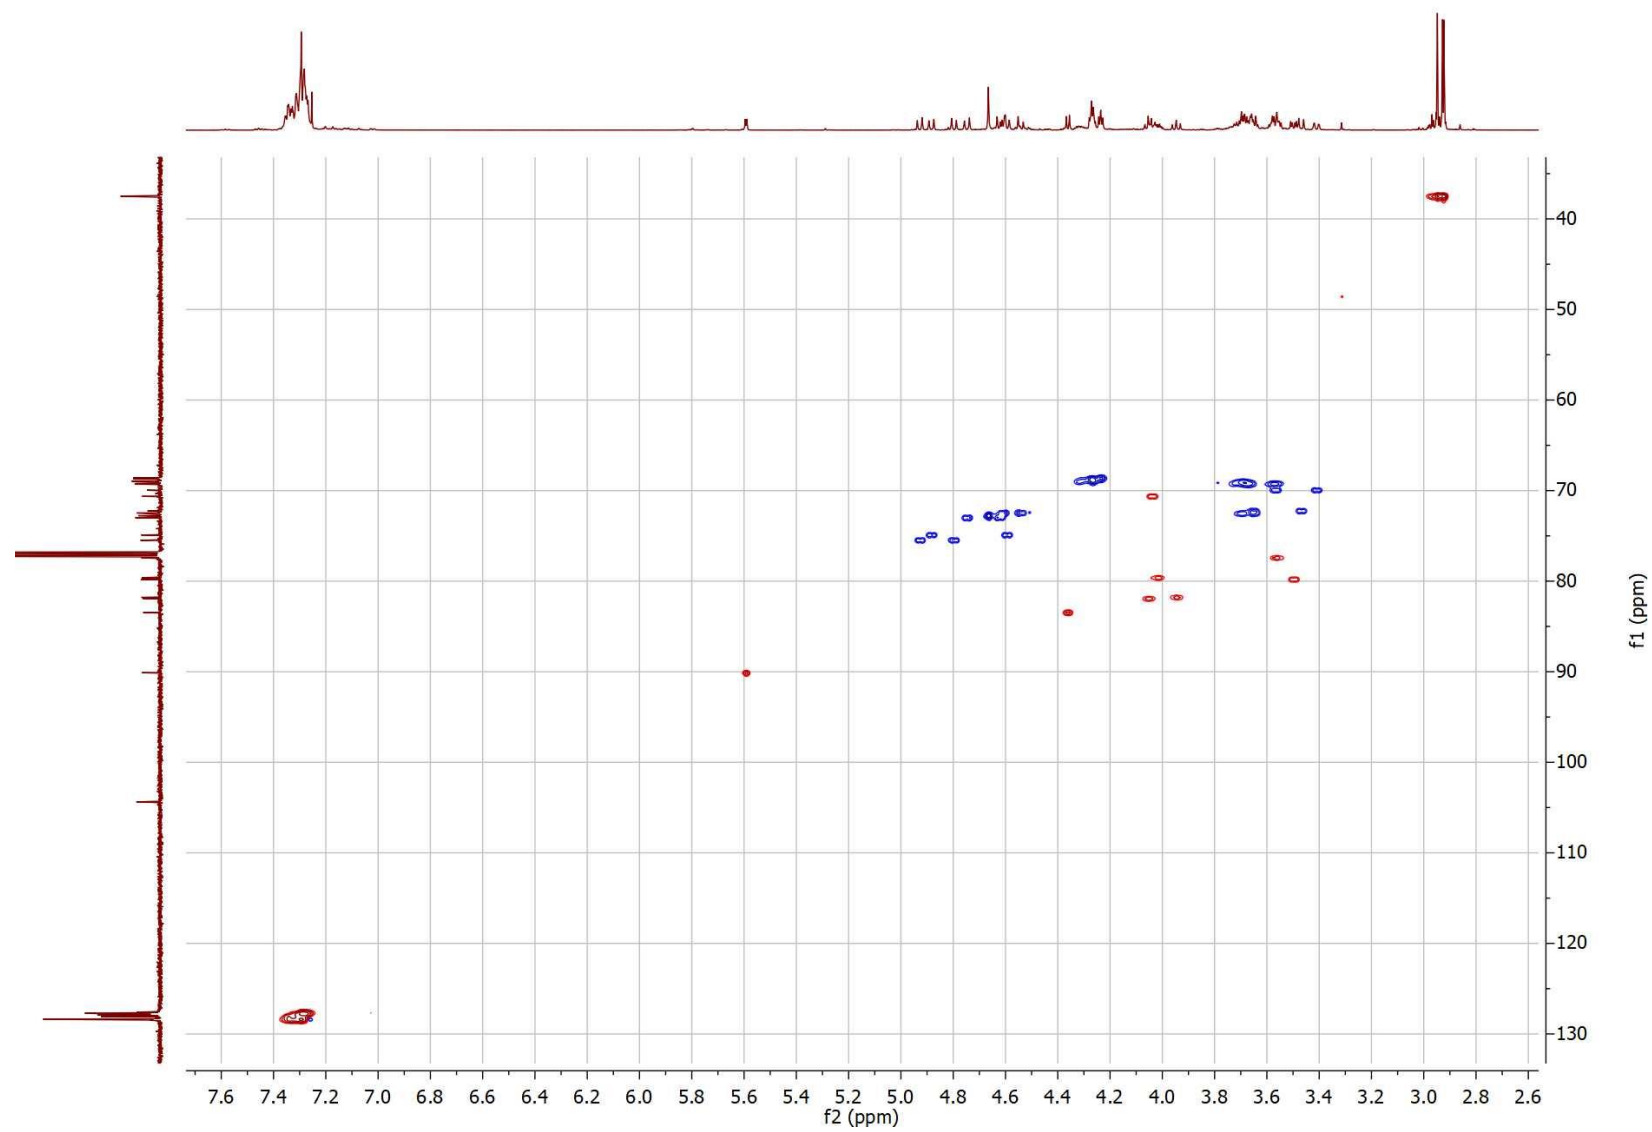

Figure S24 gHSQCAD spectrum of compound 19.

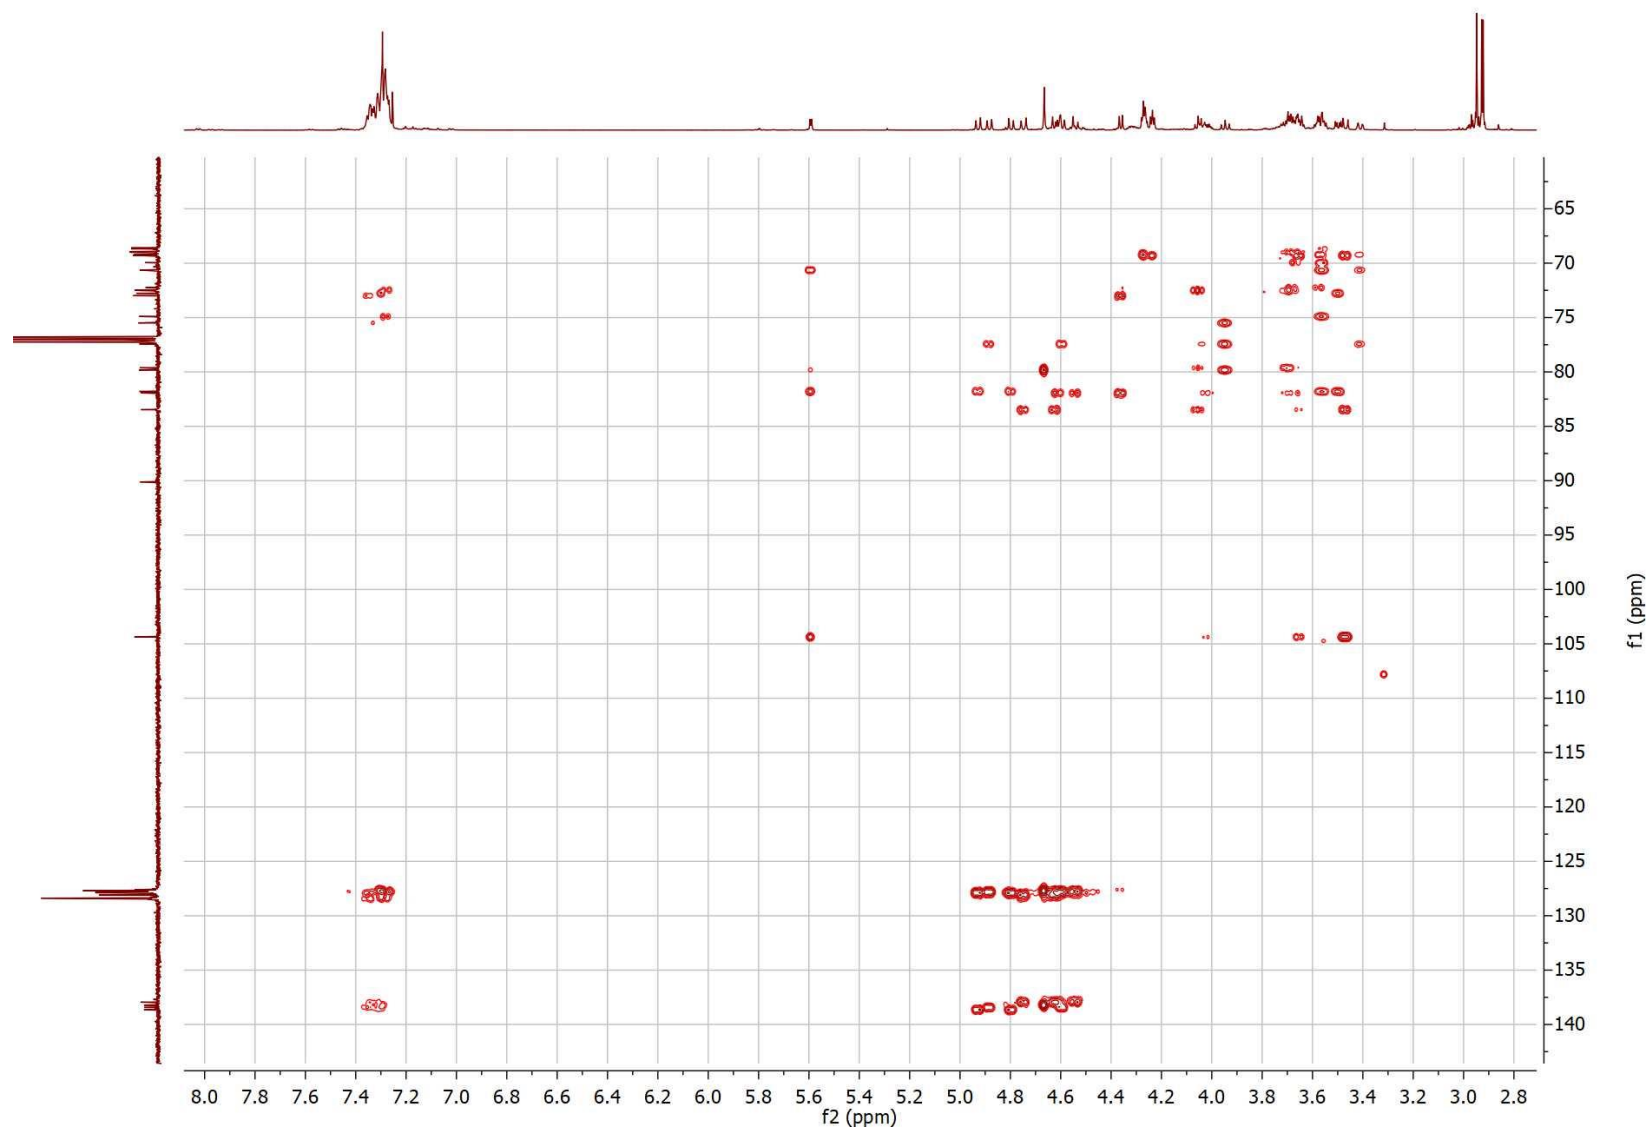

**Figure S25** gHMBCAD spectrum of compound **19**.

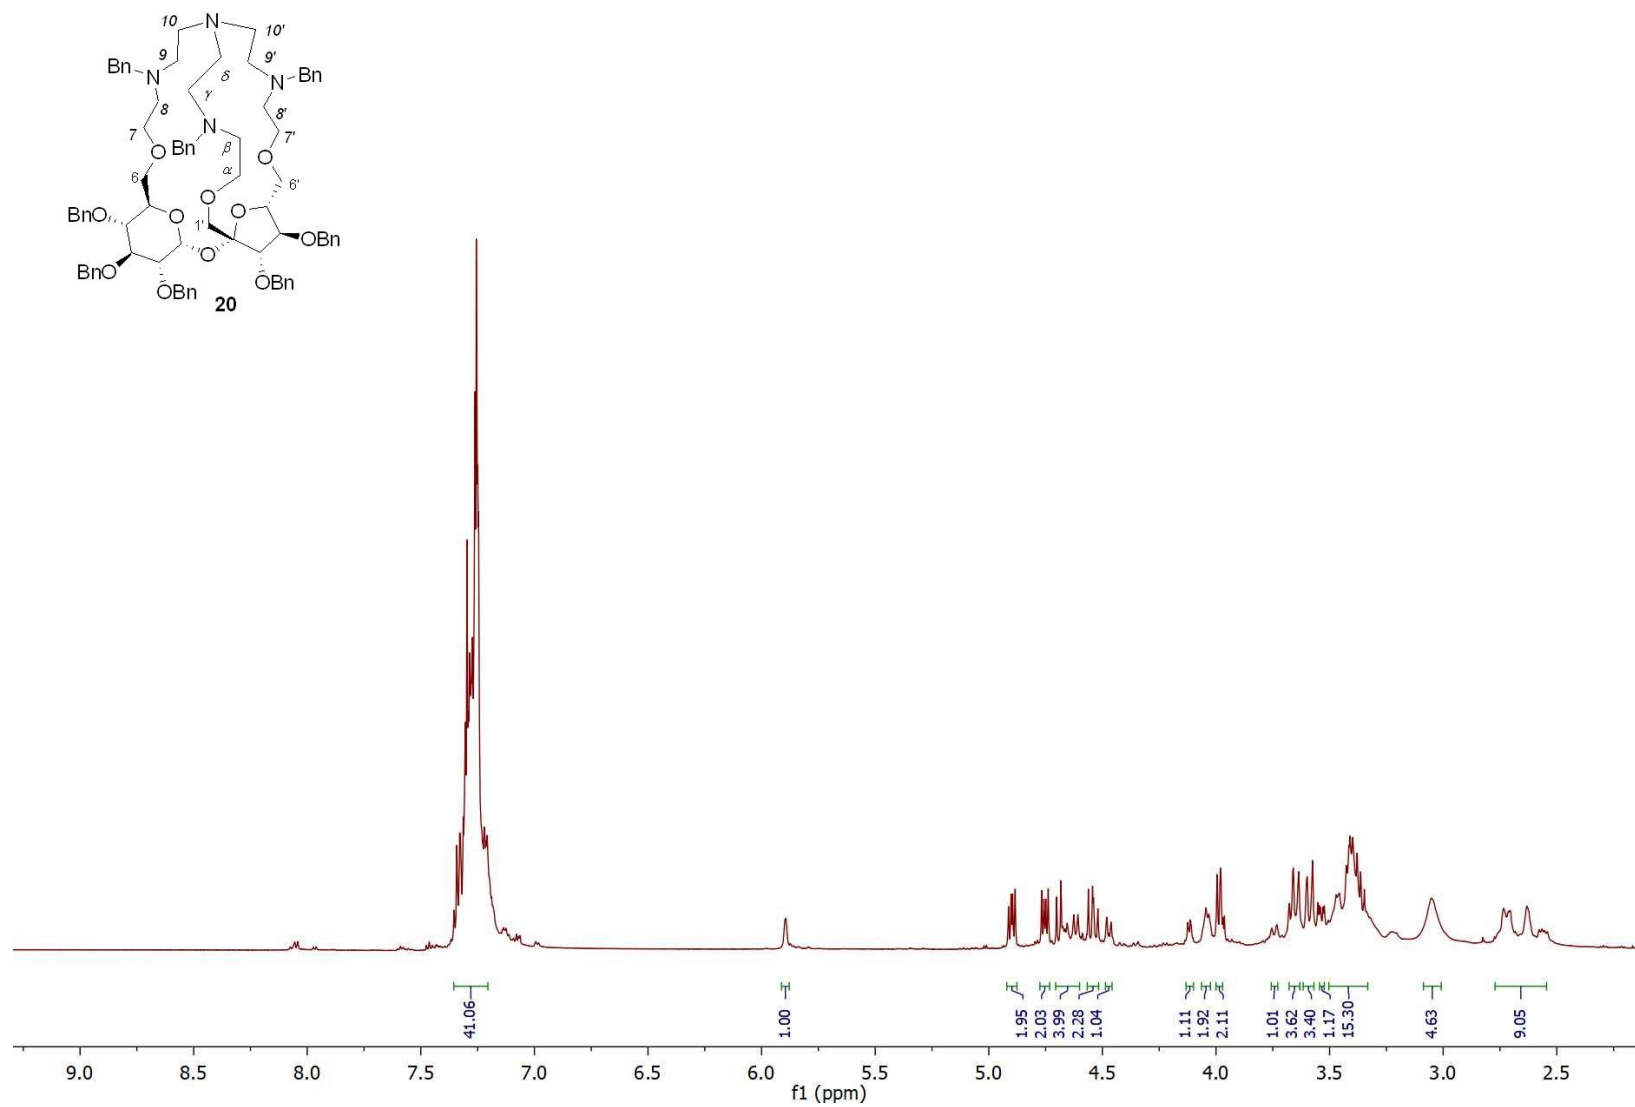

**Figure S26**  $^1\text{H}$  NMR spectrum of compound **20** ( $\text{CDCl}_3$ ).

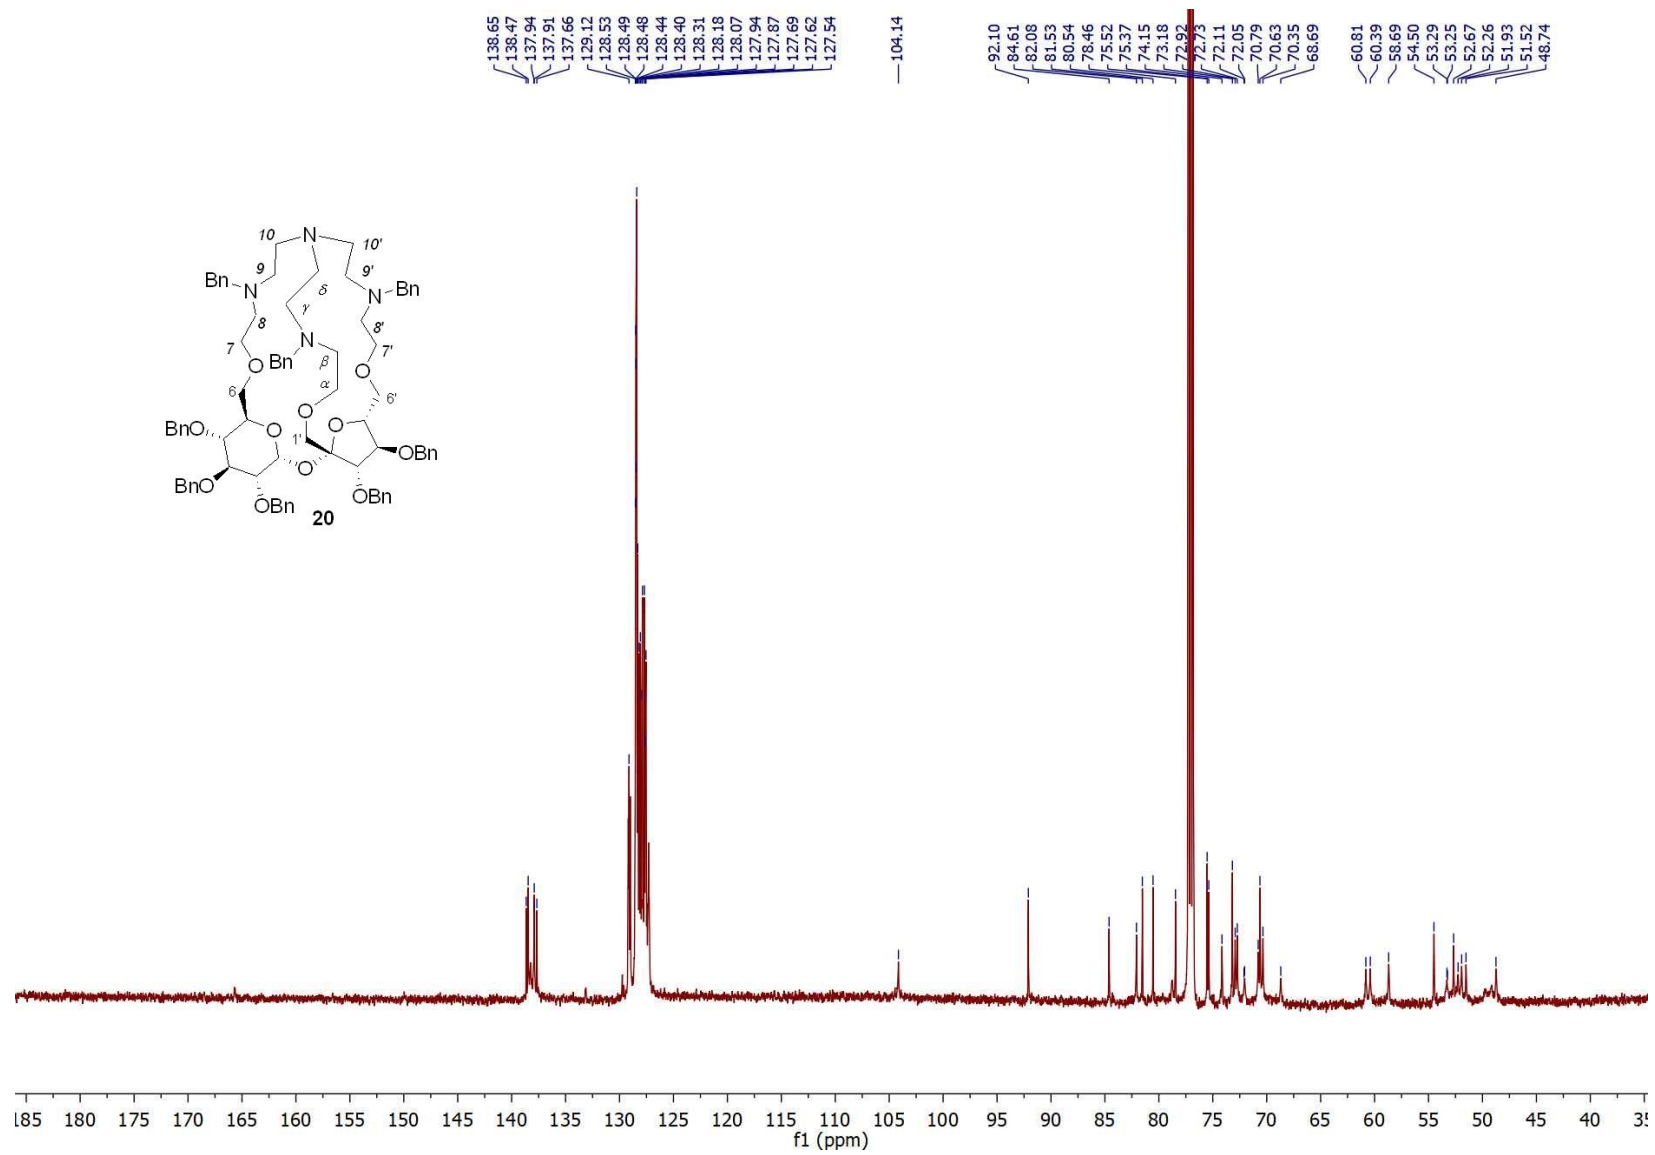

**Figure S27** <sup>13</sup>C NMR spectrum of compound **20** (CDCl<sub>3</sub>).

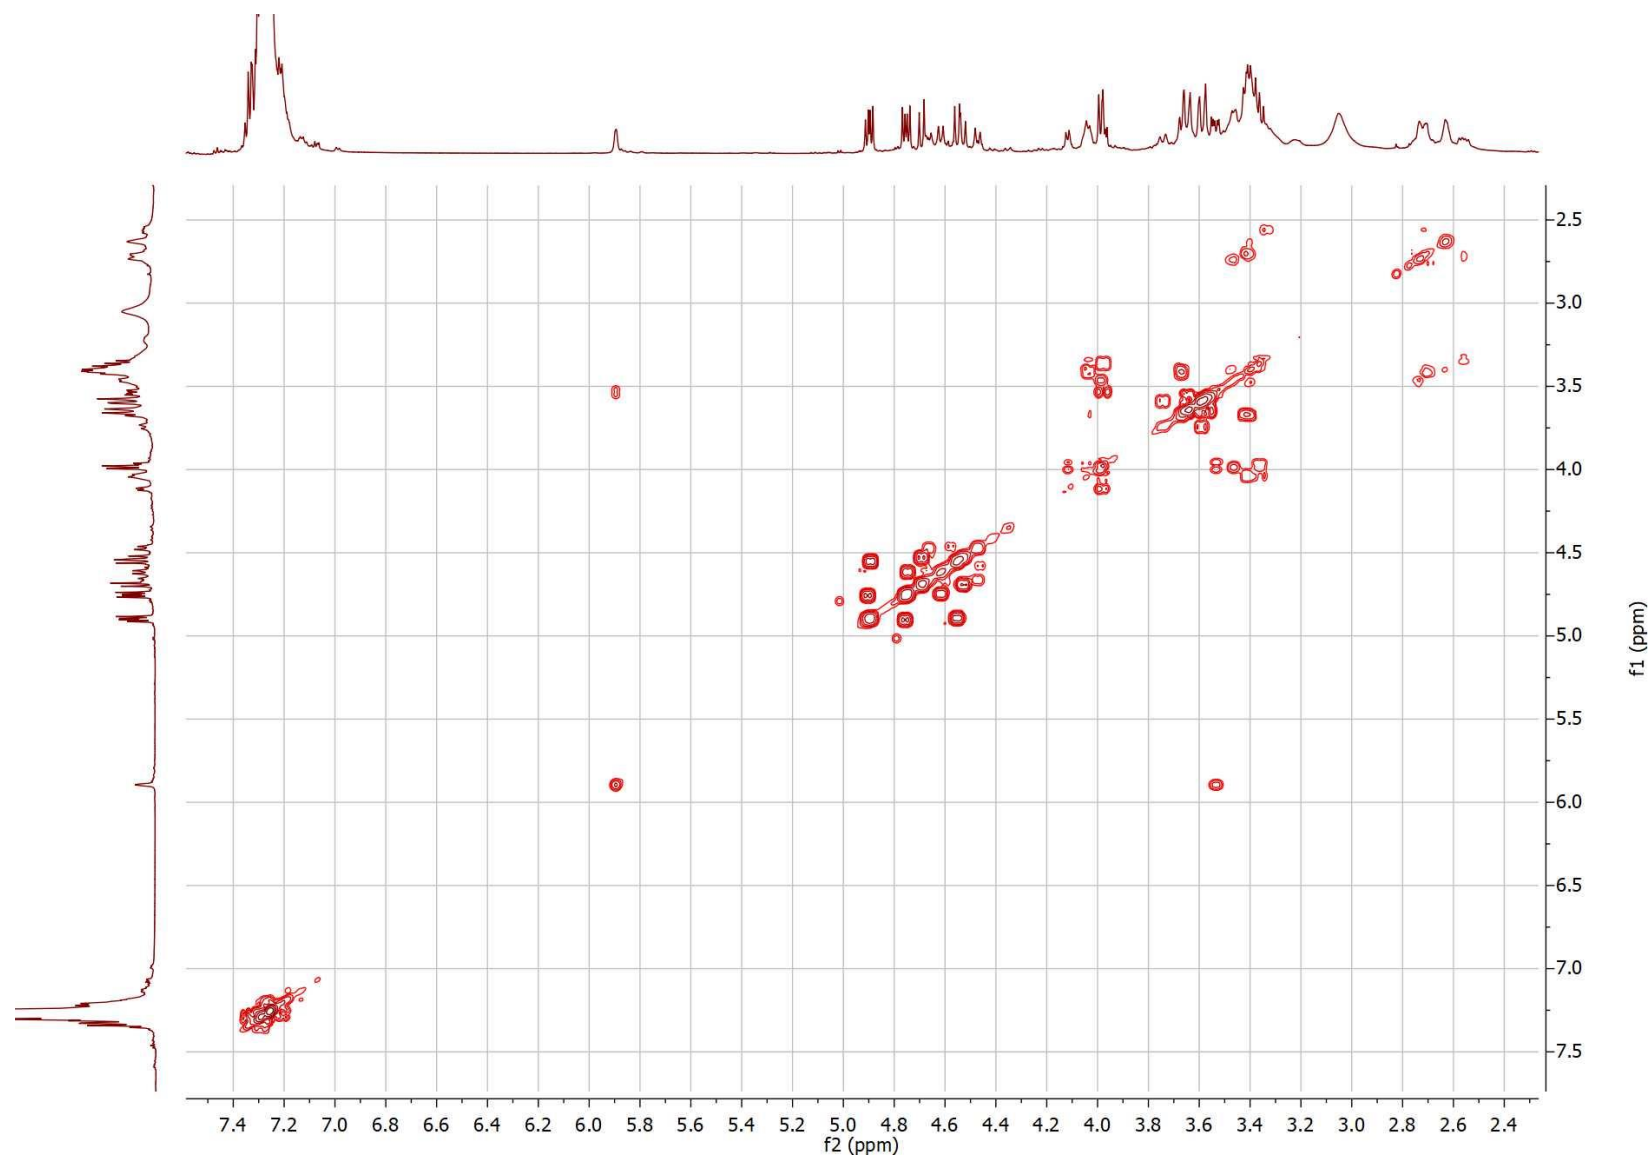

**Figure S28** gCOSY spectrum of compound **20**.

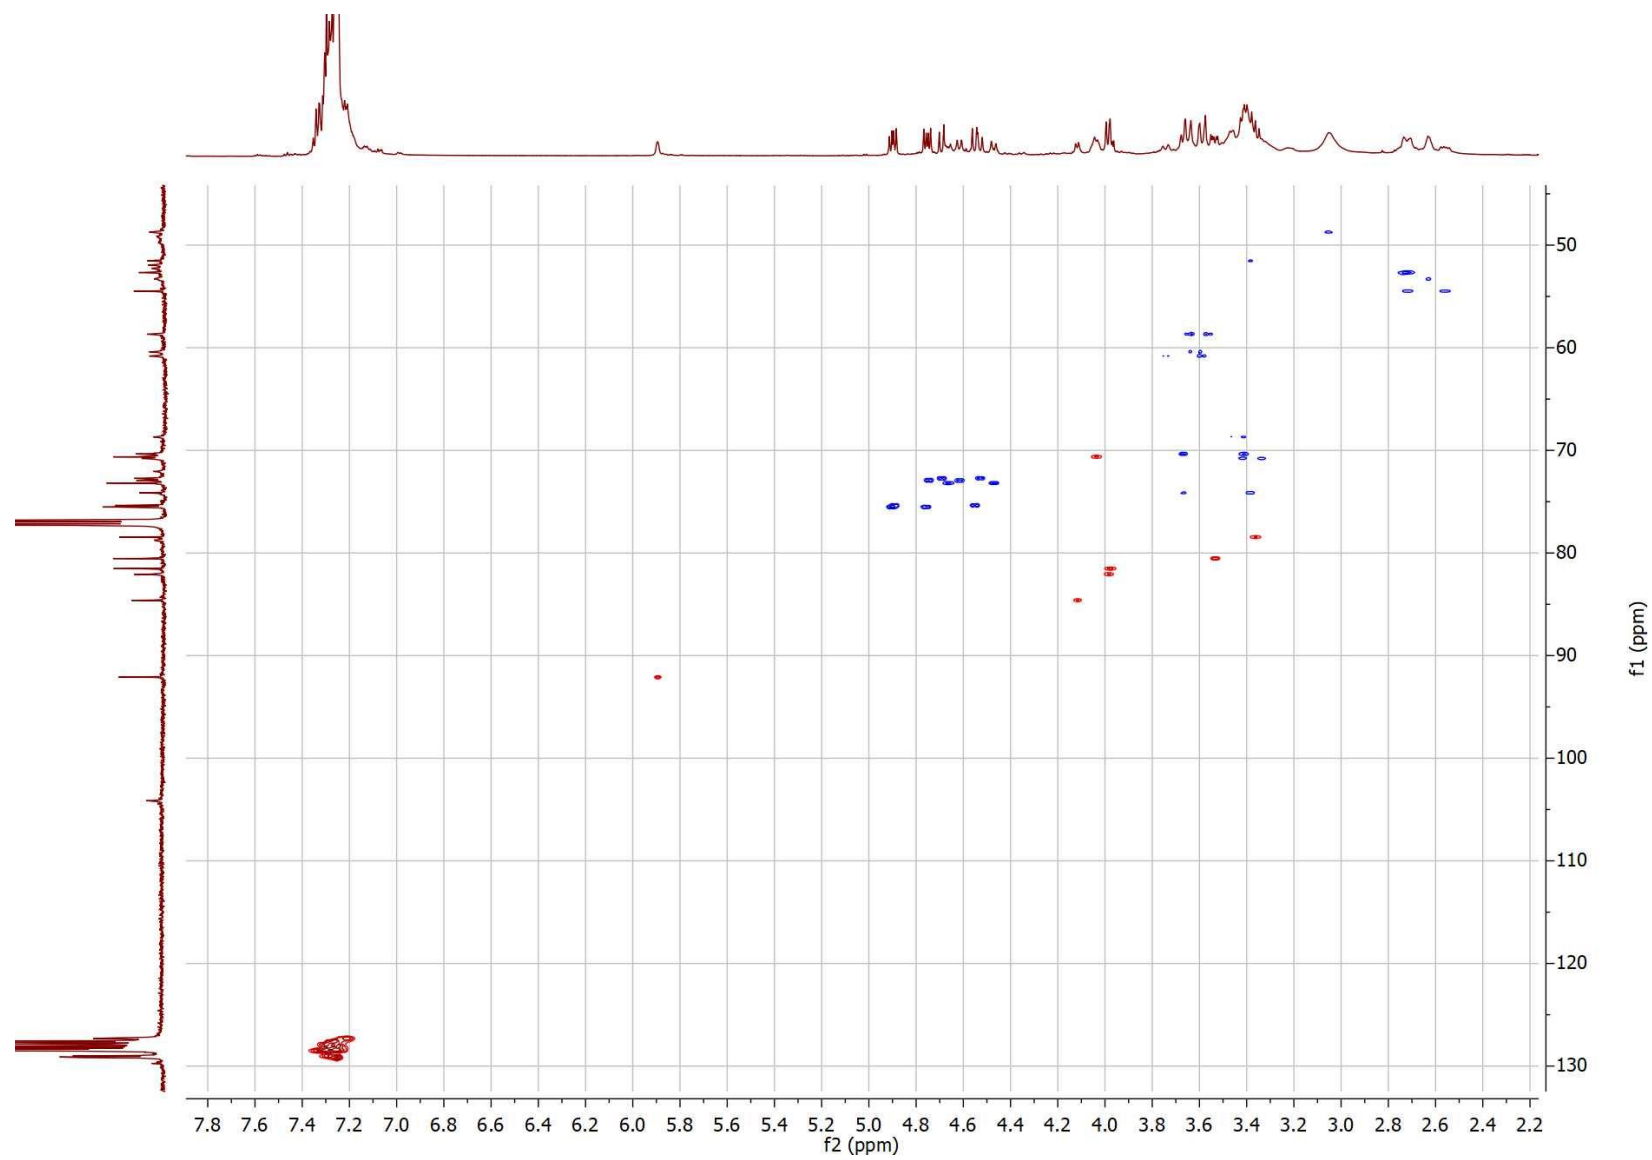

Figure S29 gHSQCAD spectrum of compound 20.

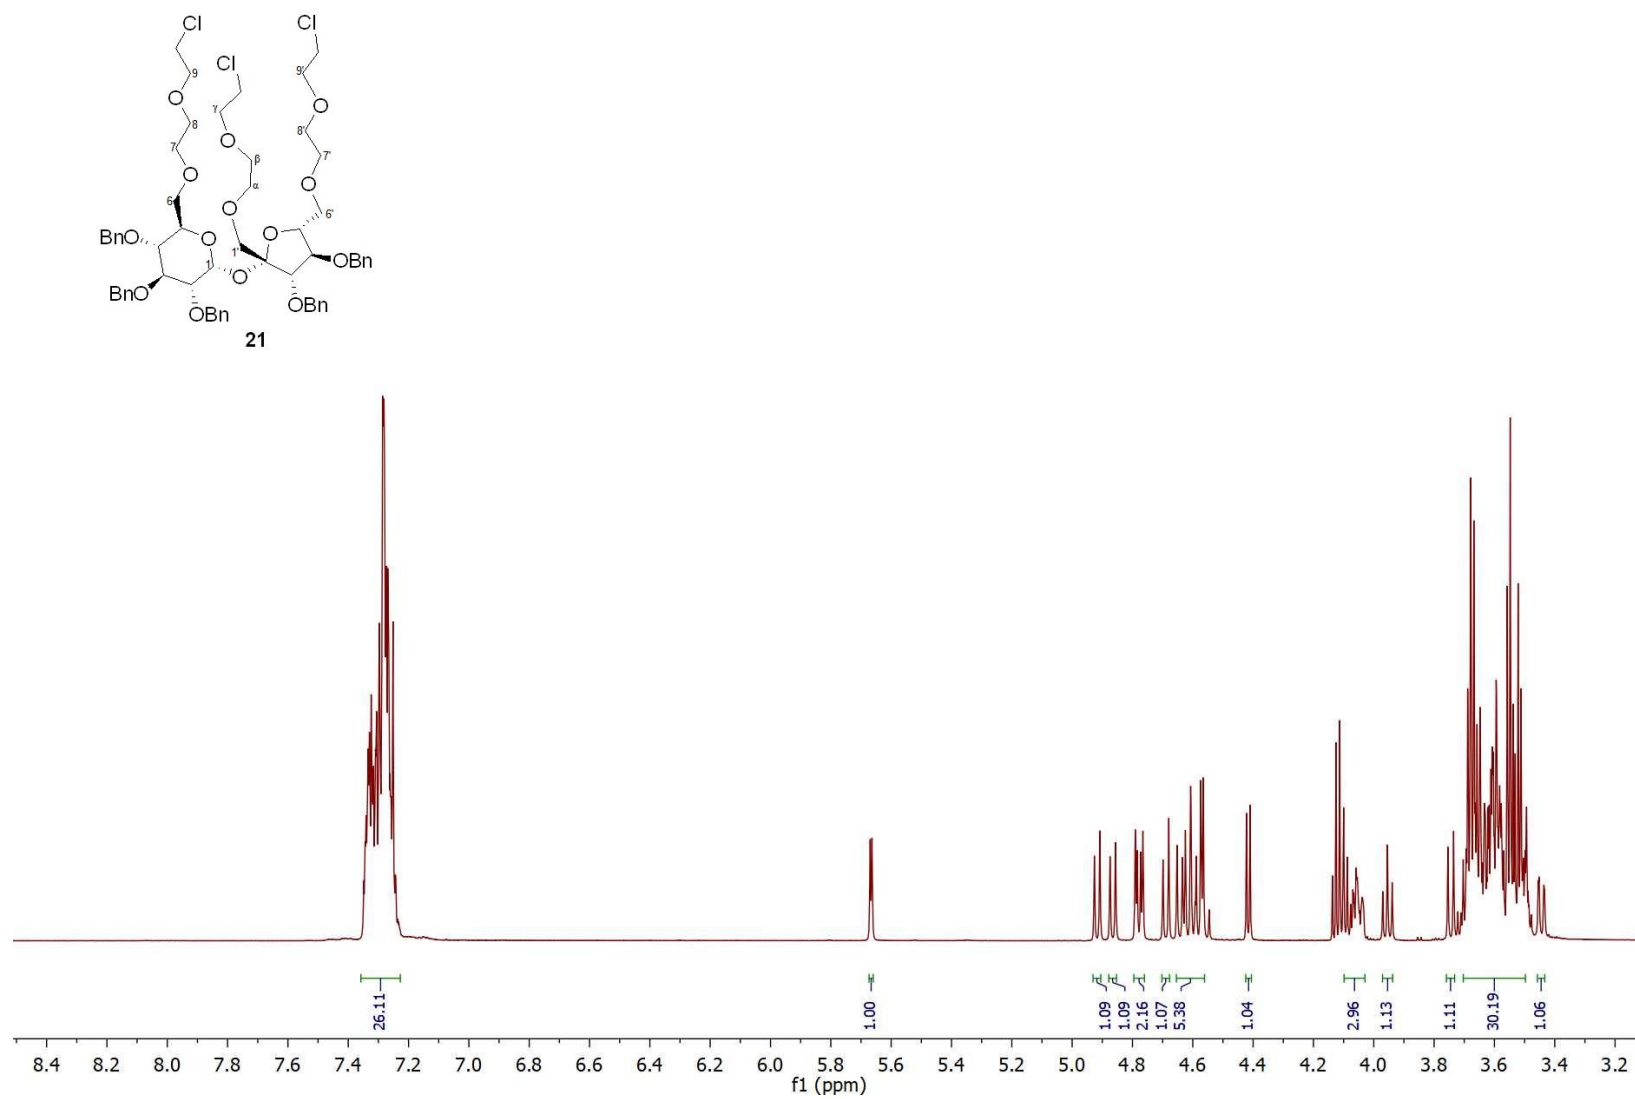

**Figure S30**  $^1\text{H}$  NMR spectrum of compound **21** (CDCl<sub>3</sub>).

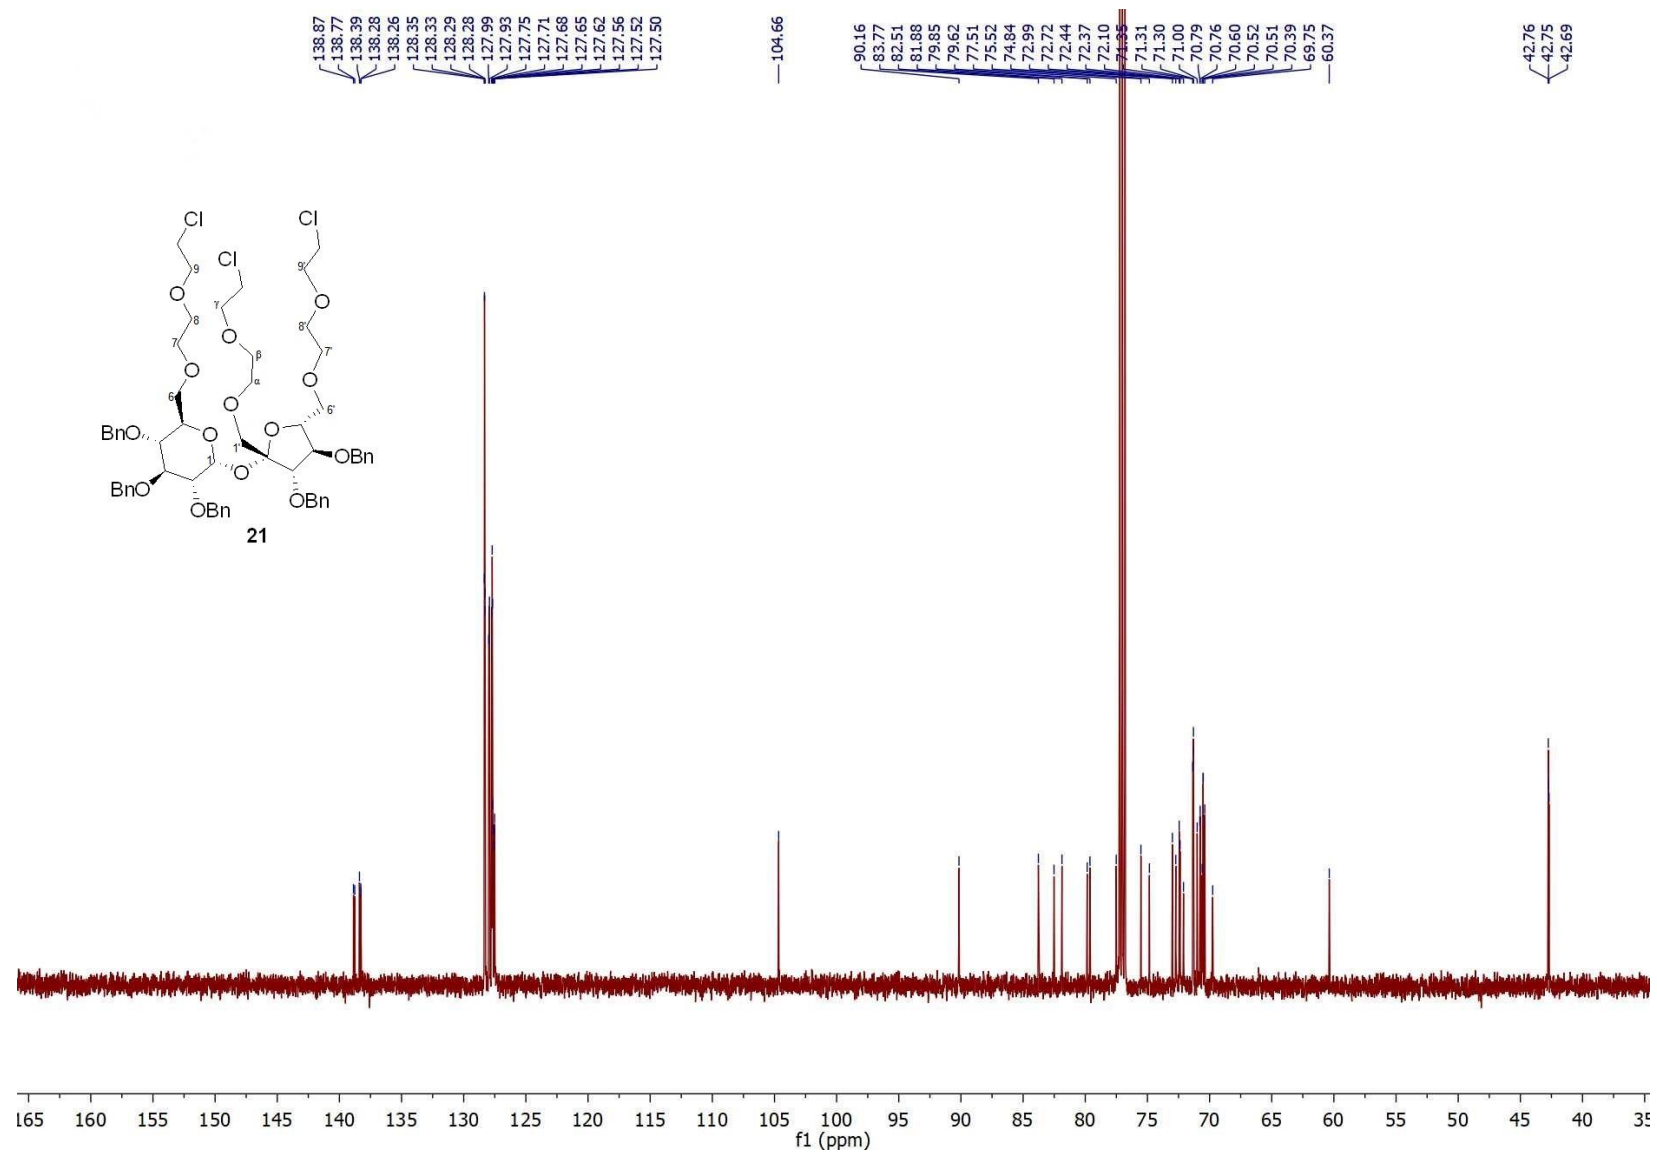

**Figure S31** <sup>13</sup>C NMR spectrum of compound **21** (CDCl<sub>3</sub>).



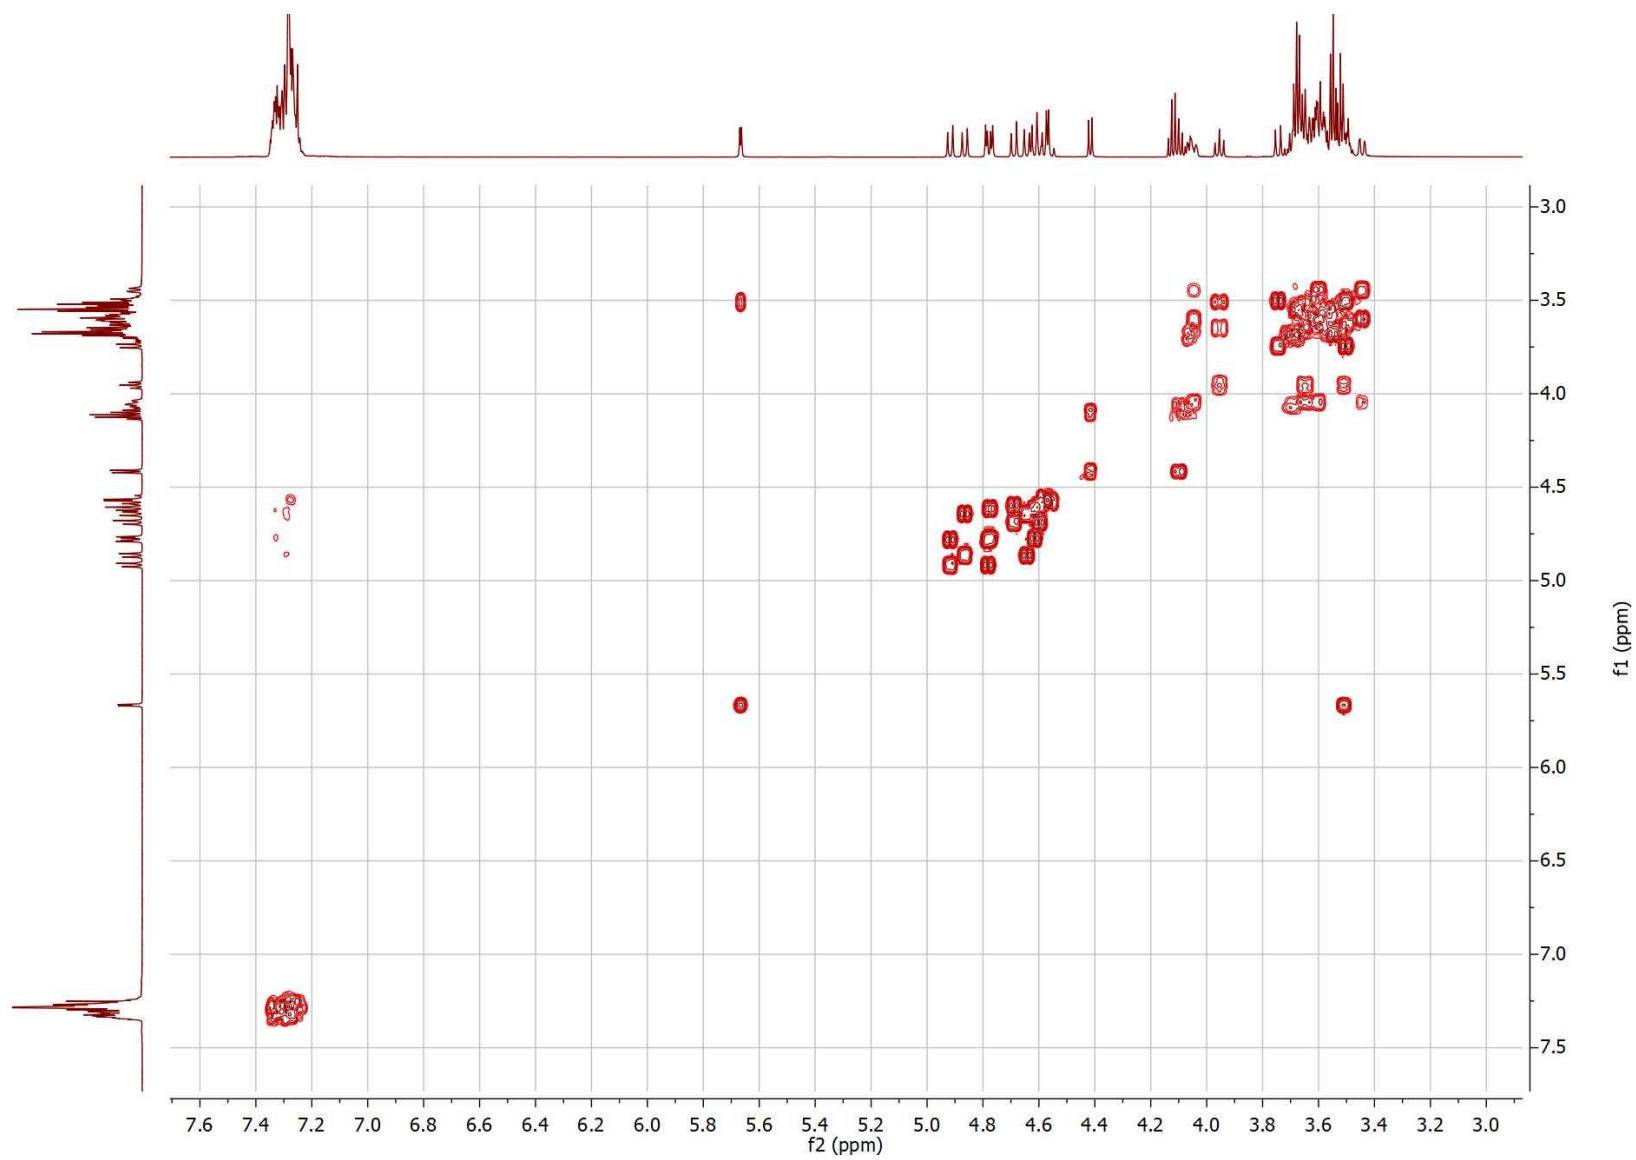

**Figure S32** gCOSY spectrum of compound **21**.

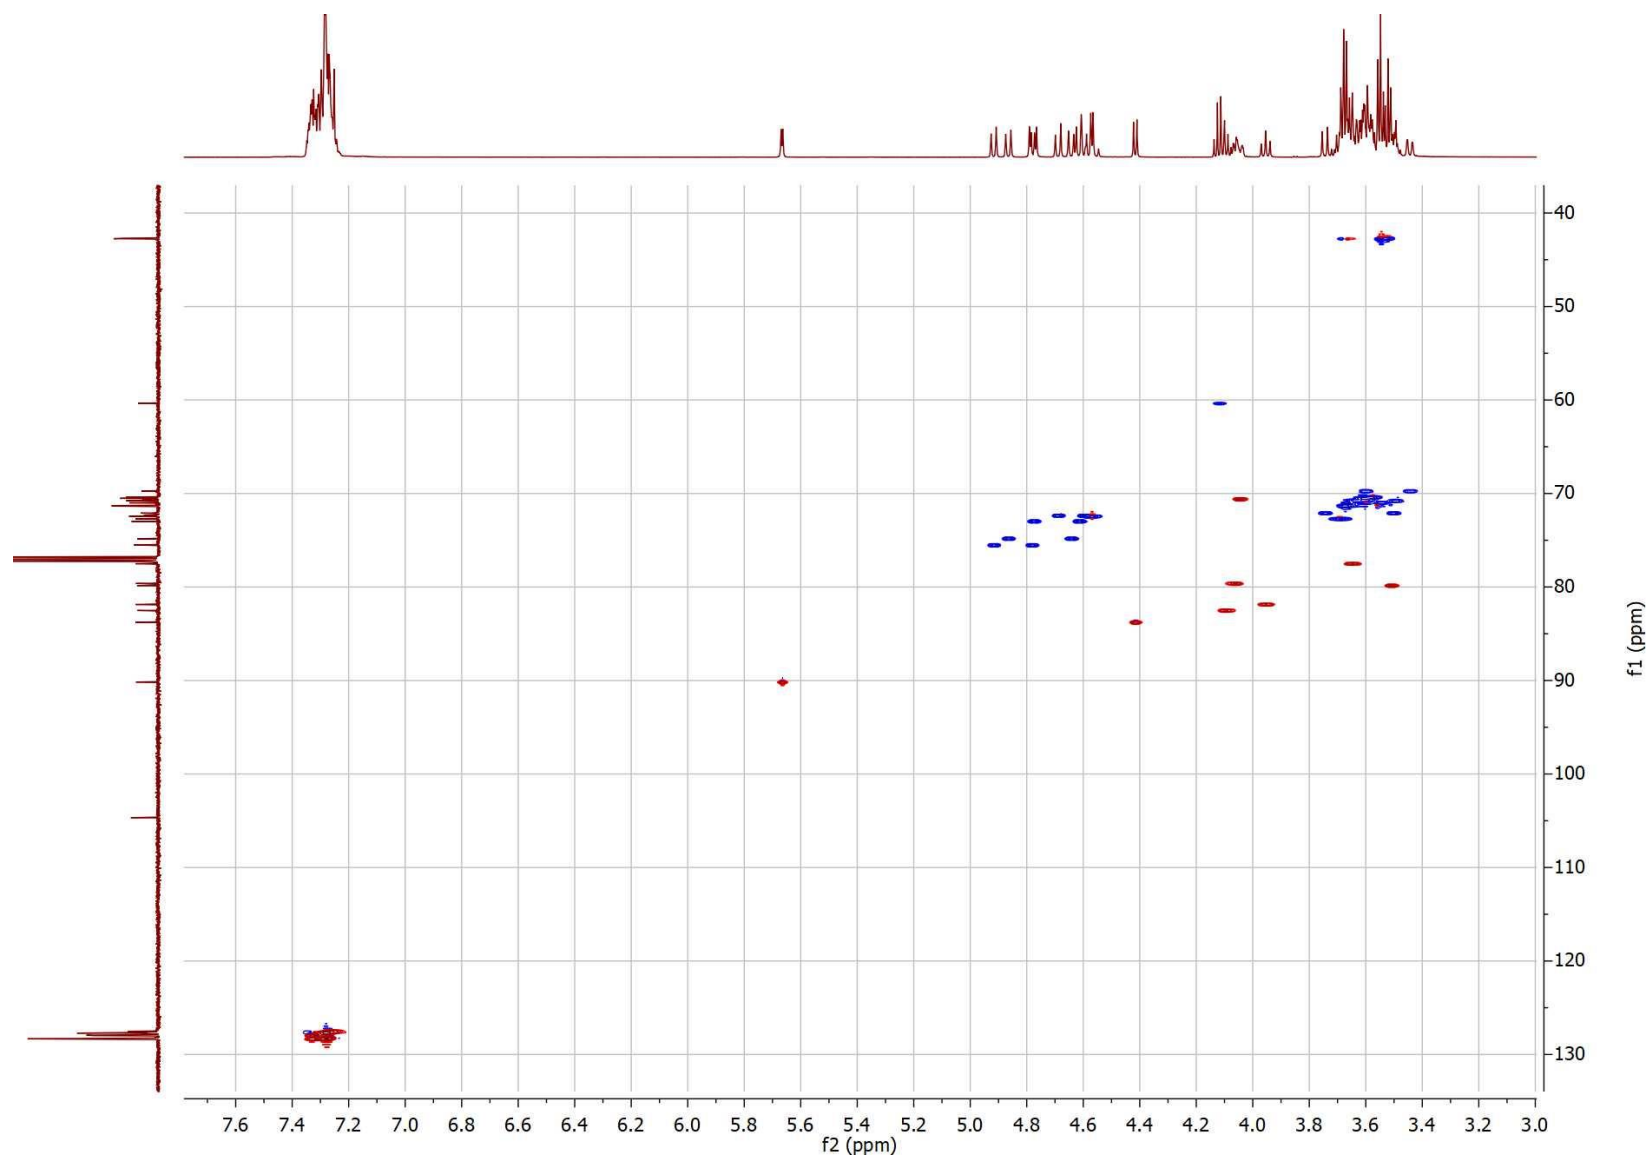

**Figure S33** gHSQCAD spectrum of compound **21**.

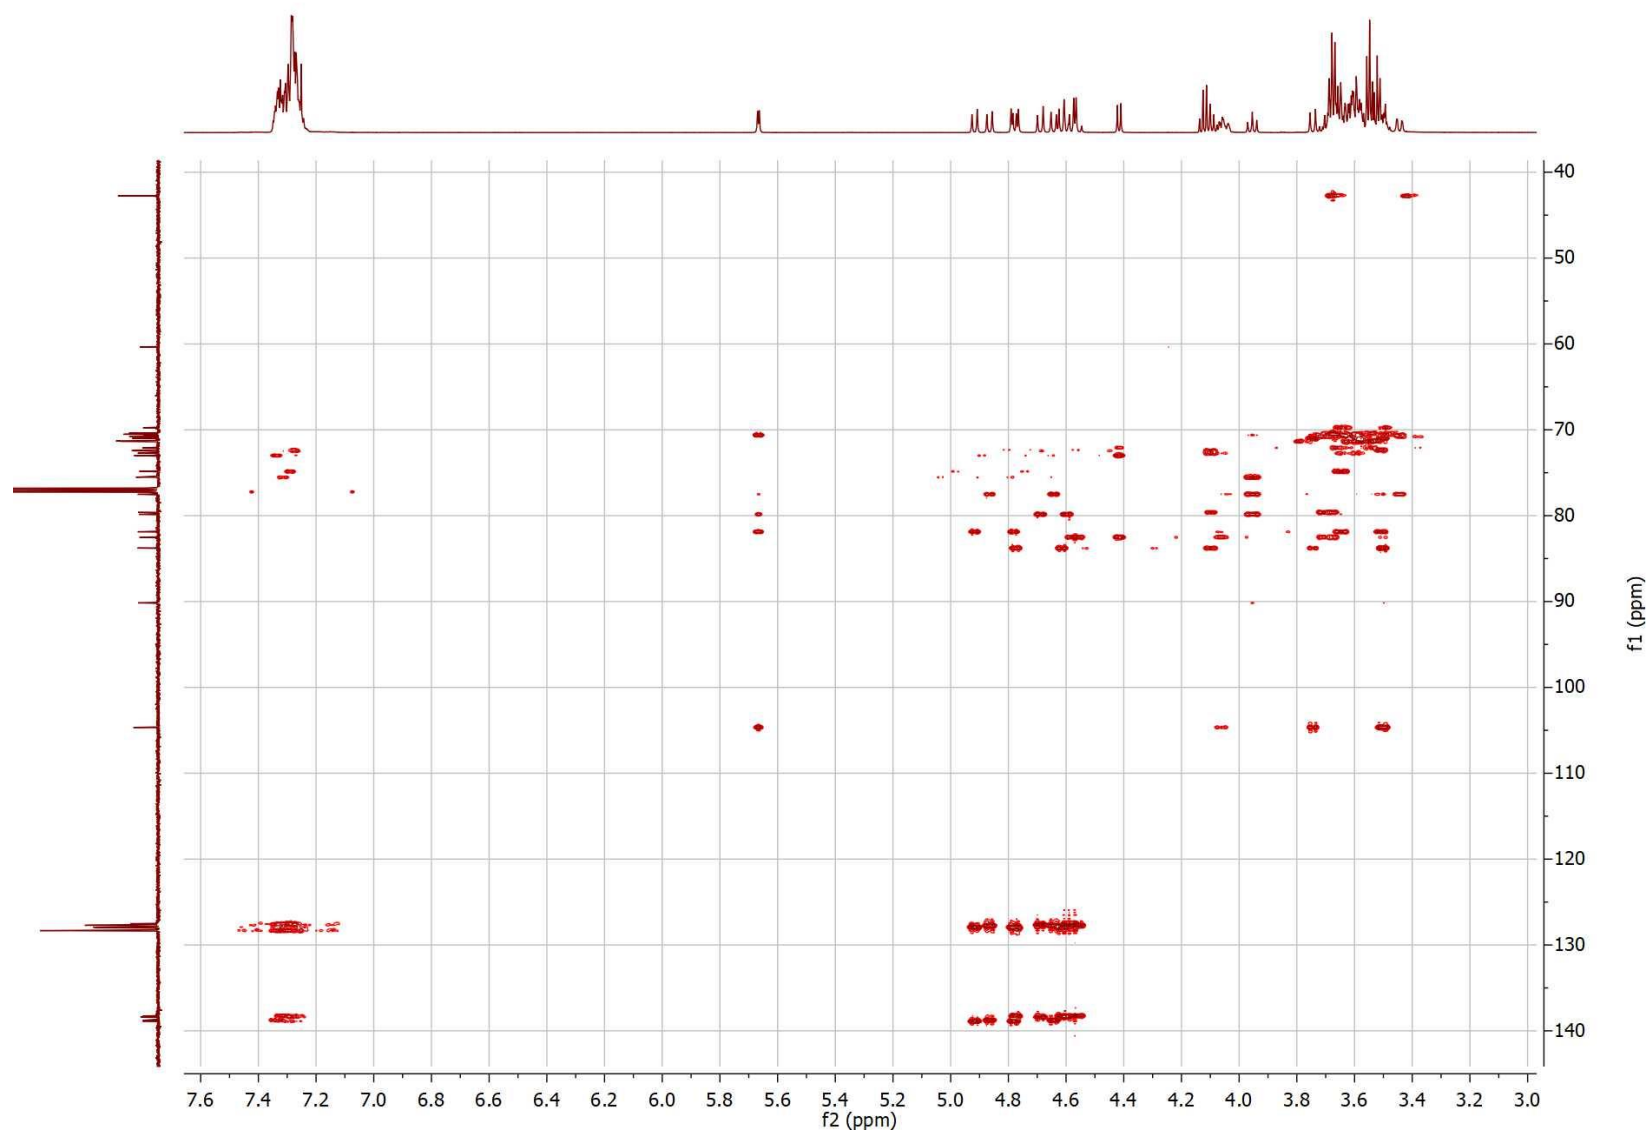

**Figure S34** gHMBCAD spectrum of compound **21**.

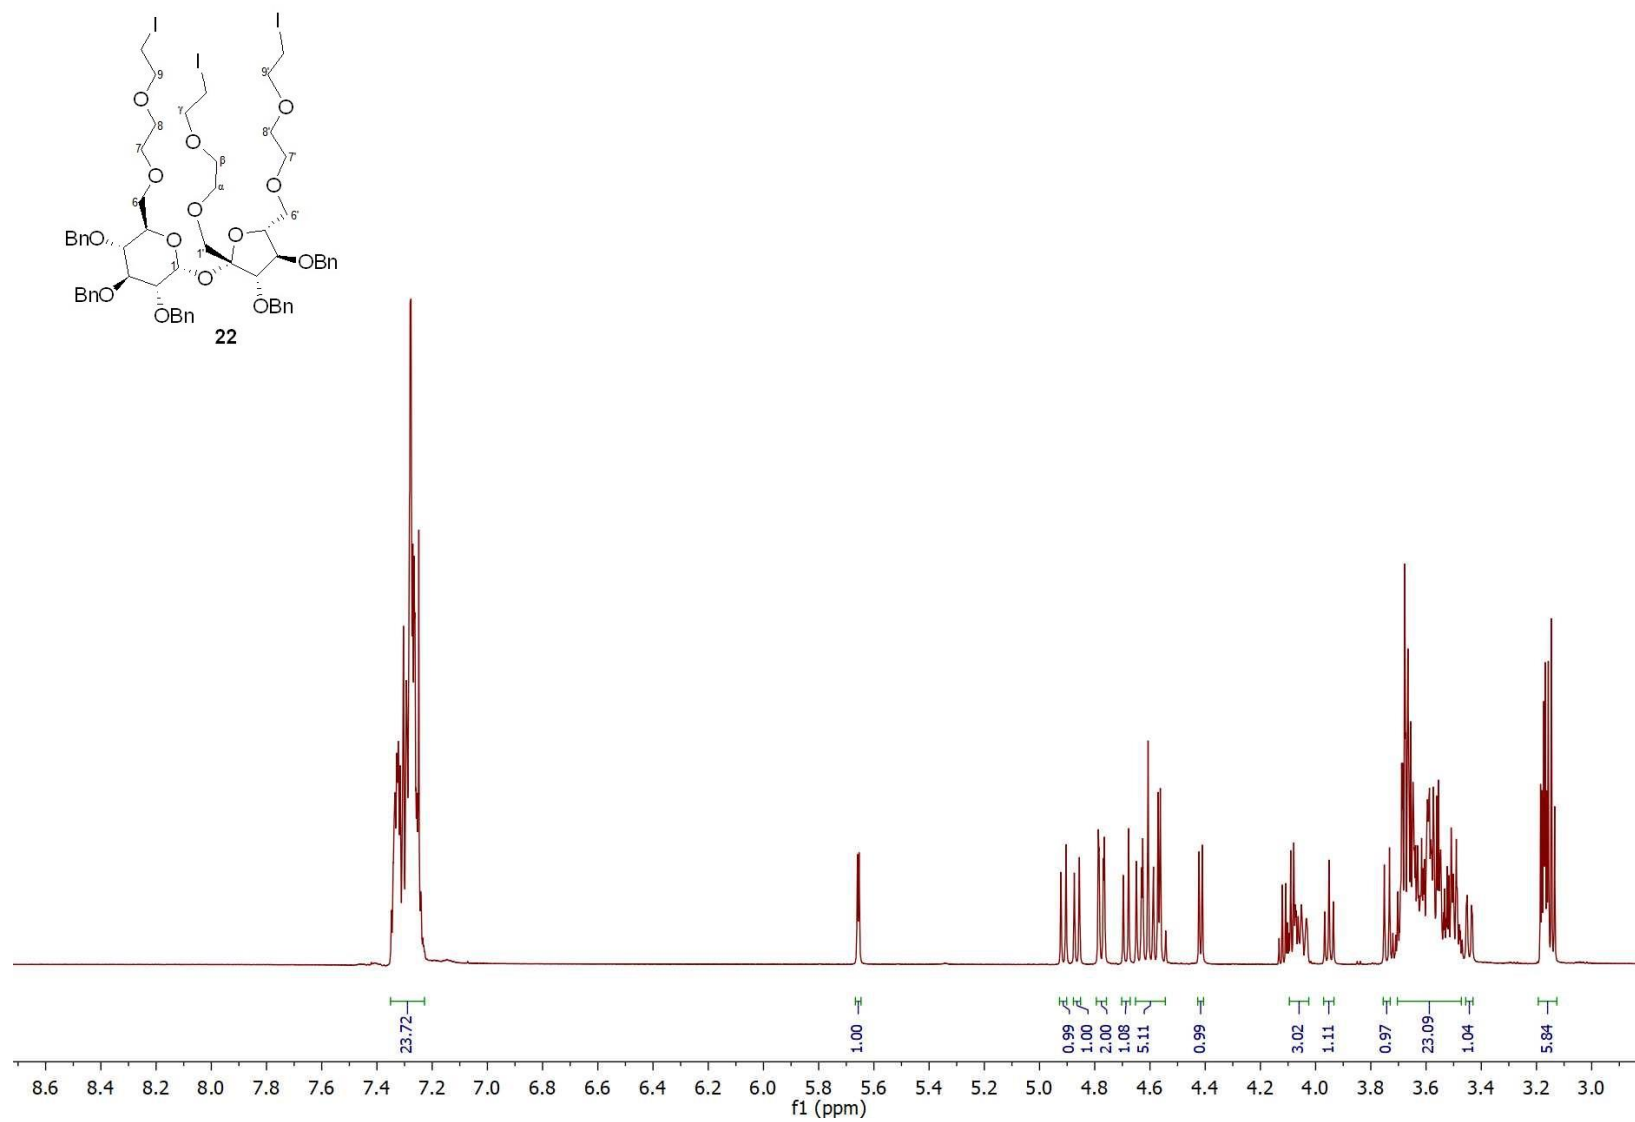

**Figure S35**  $^1\text{H}$  NMR spectrum of compound **22** ( $\text{CDCl}_3$ ).

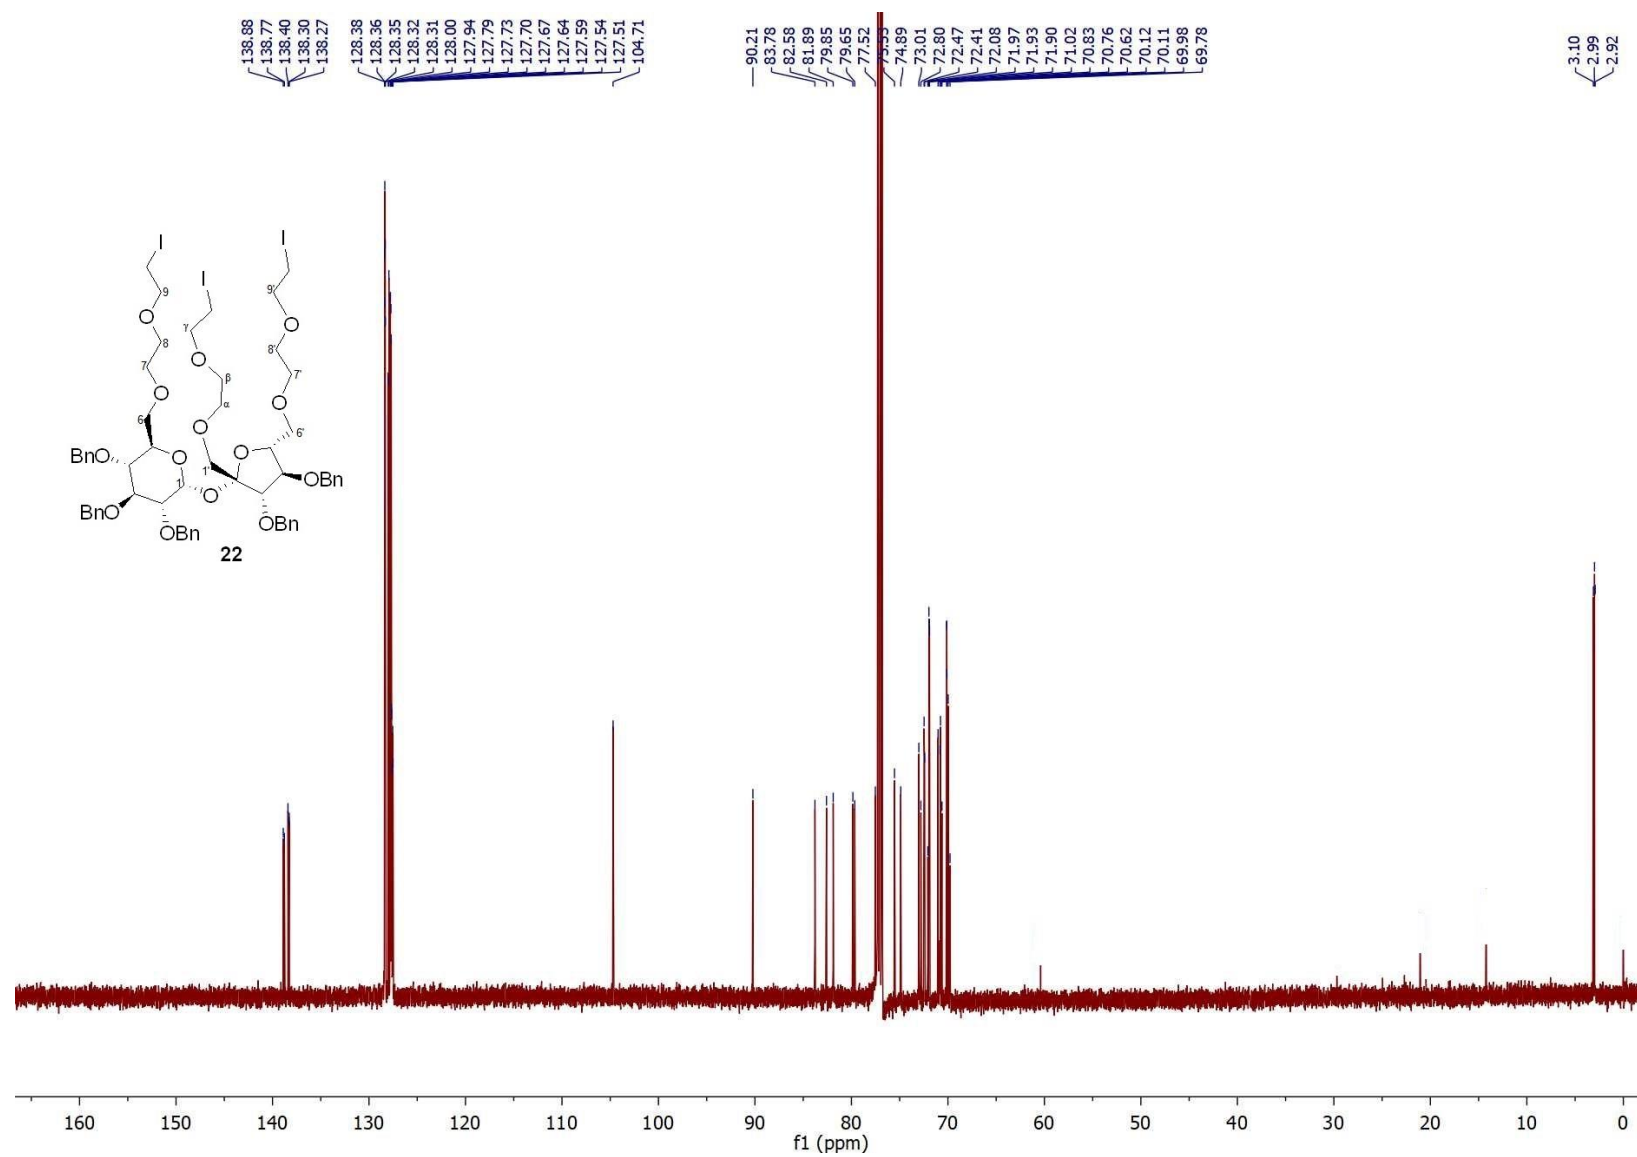

**Figure S36**  $^{13}\text{C}$  NMR spectrum of compound **22** (CDCl<sub>3</sub>).

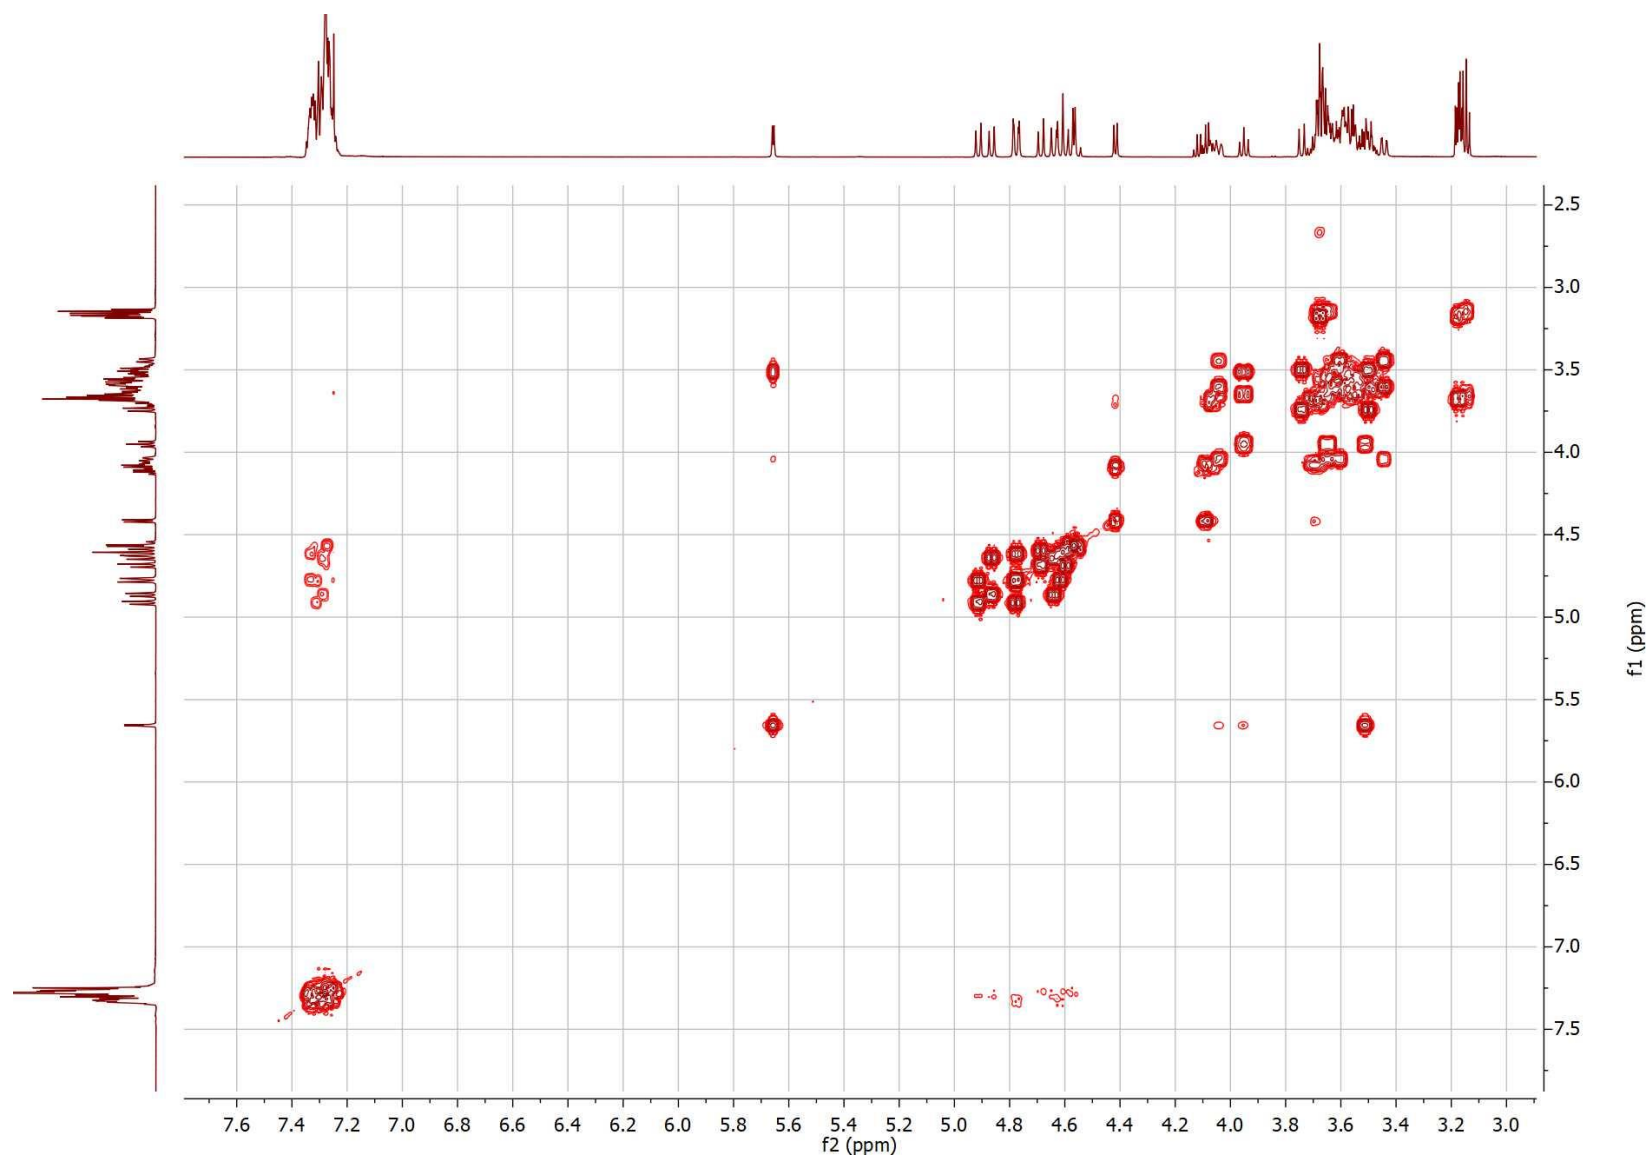

**Figure S37** gCOSY spectrum of compound **22**.

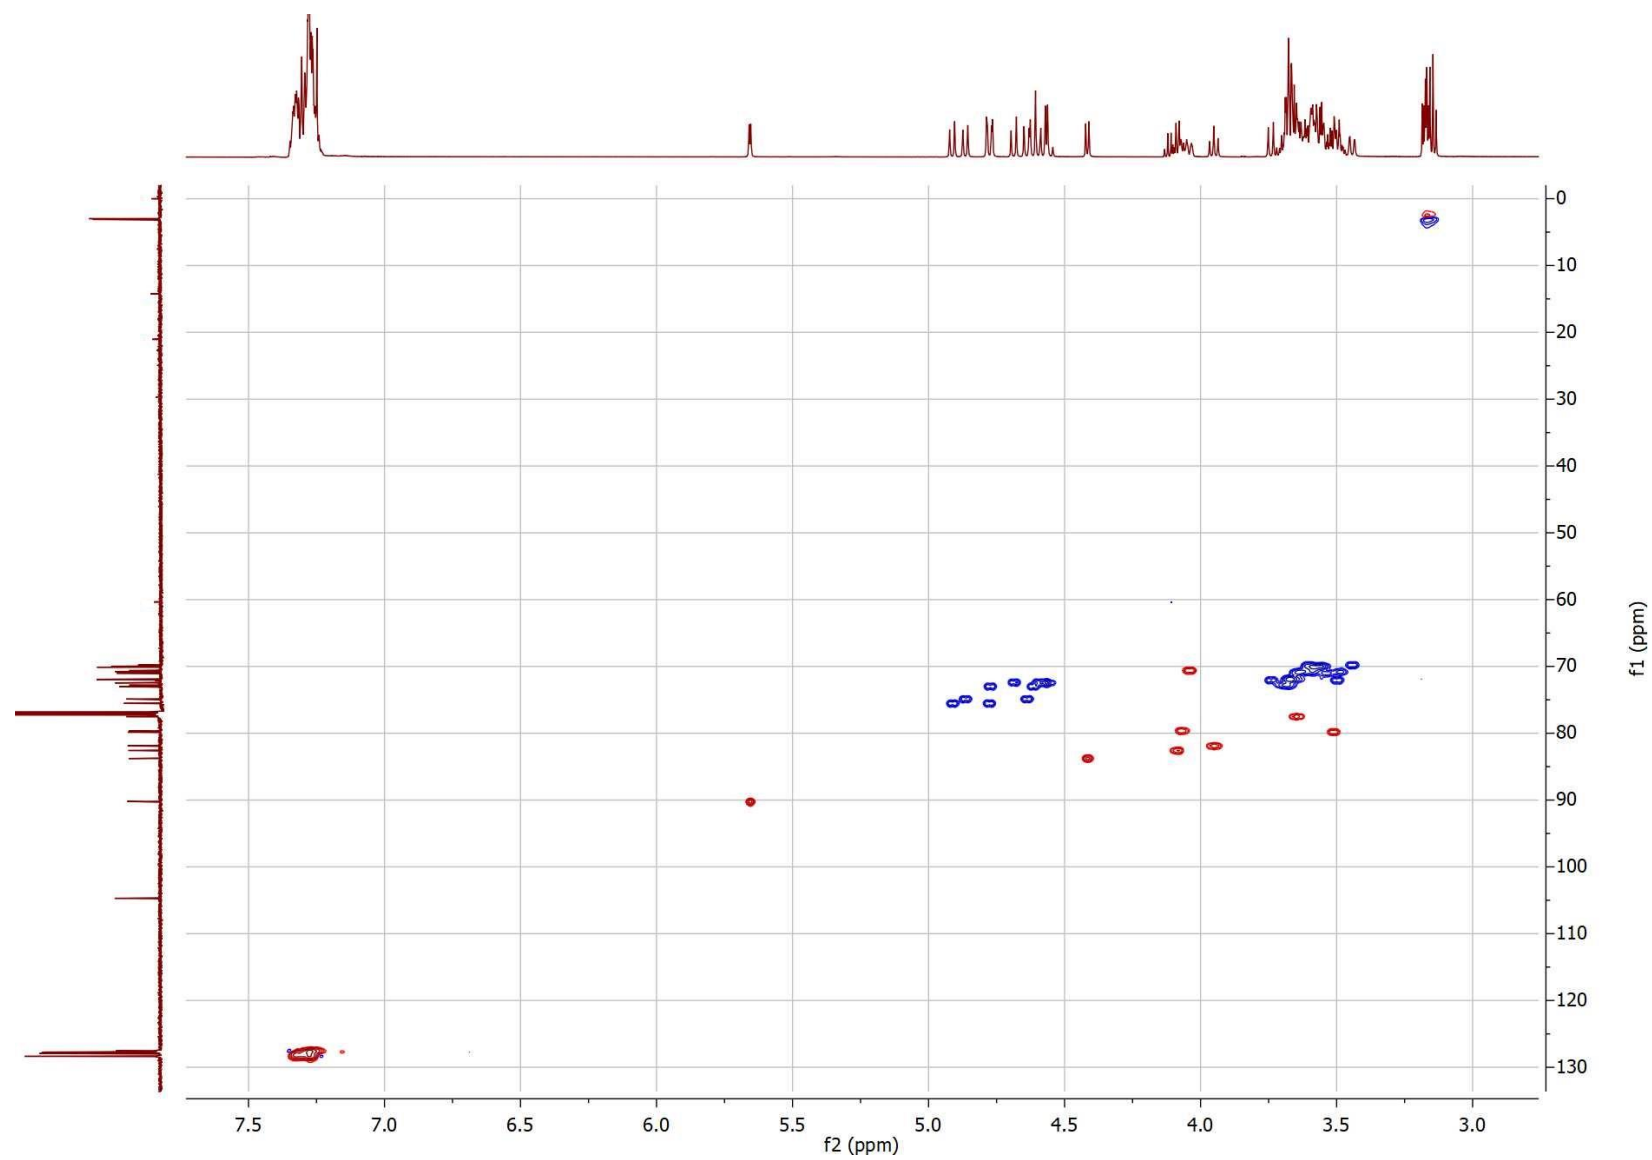

**Figure S38** gHSQCAD spectrum of compound **22**.

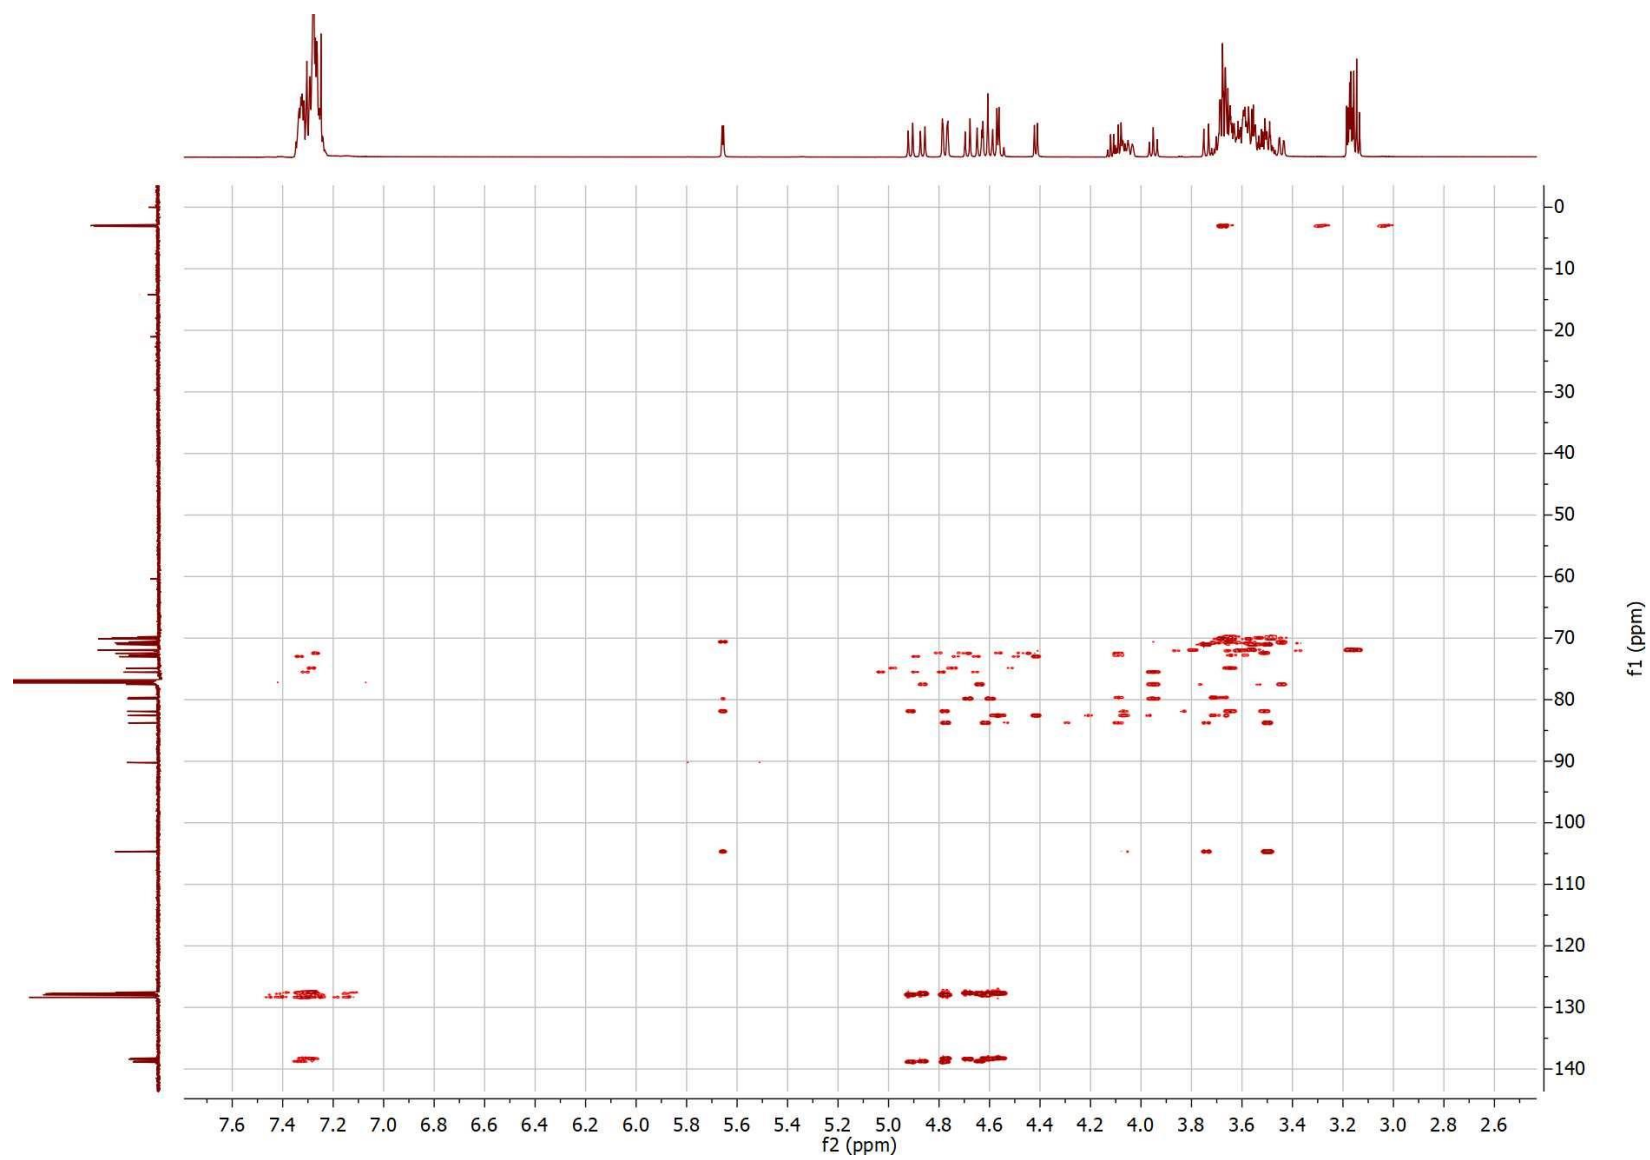

**Figure S39** gHMBCAD spectrum of compound **22**.



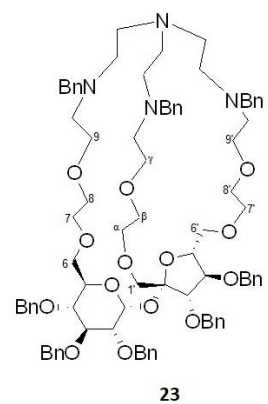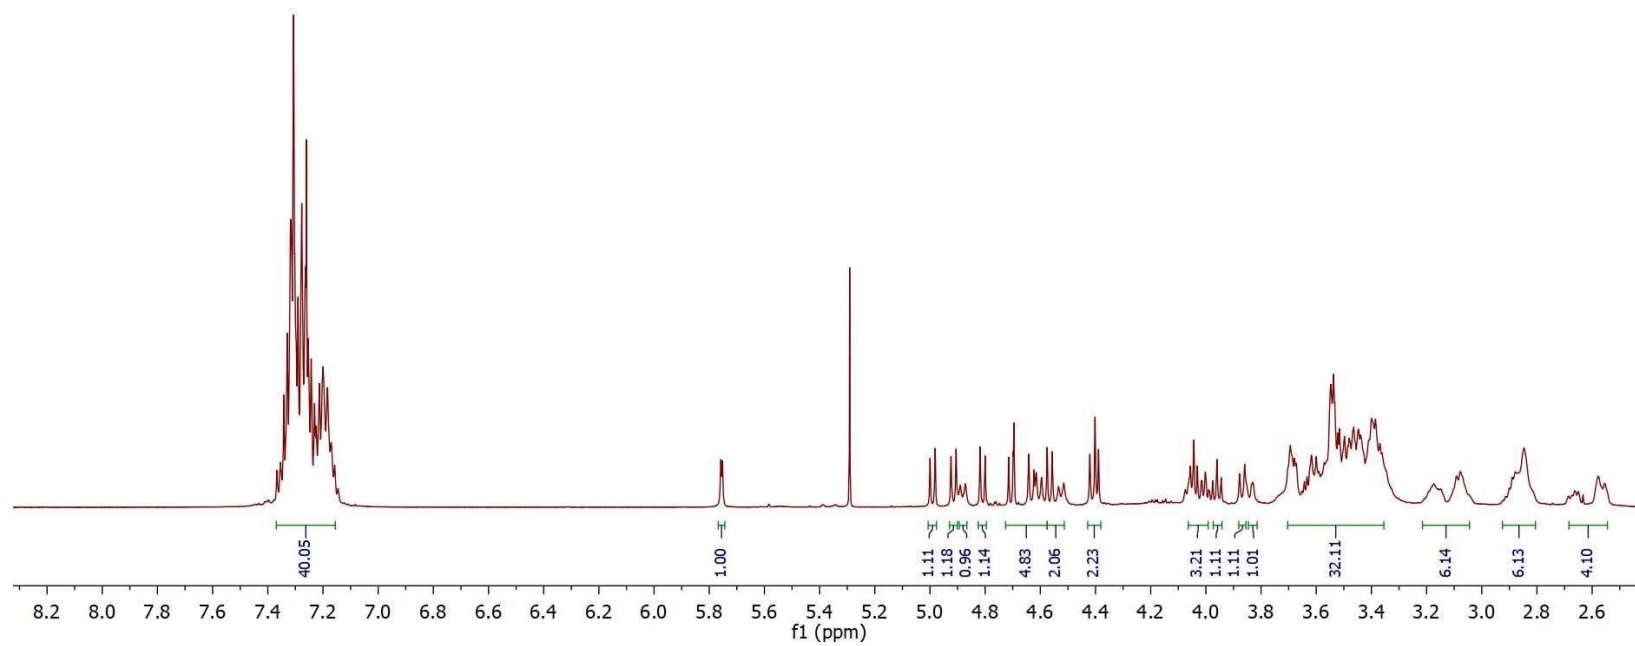

**Figure S40**  $^1\text{H}$  NMR spectrum of compound **23** (acetone- $d_6$ ).

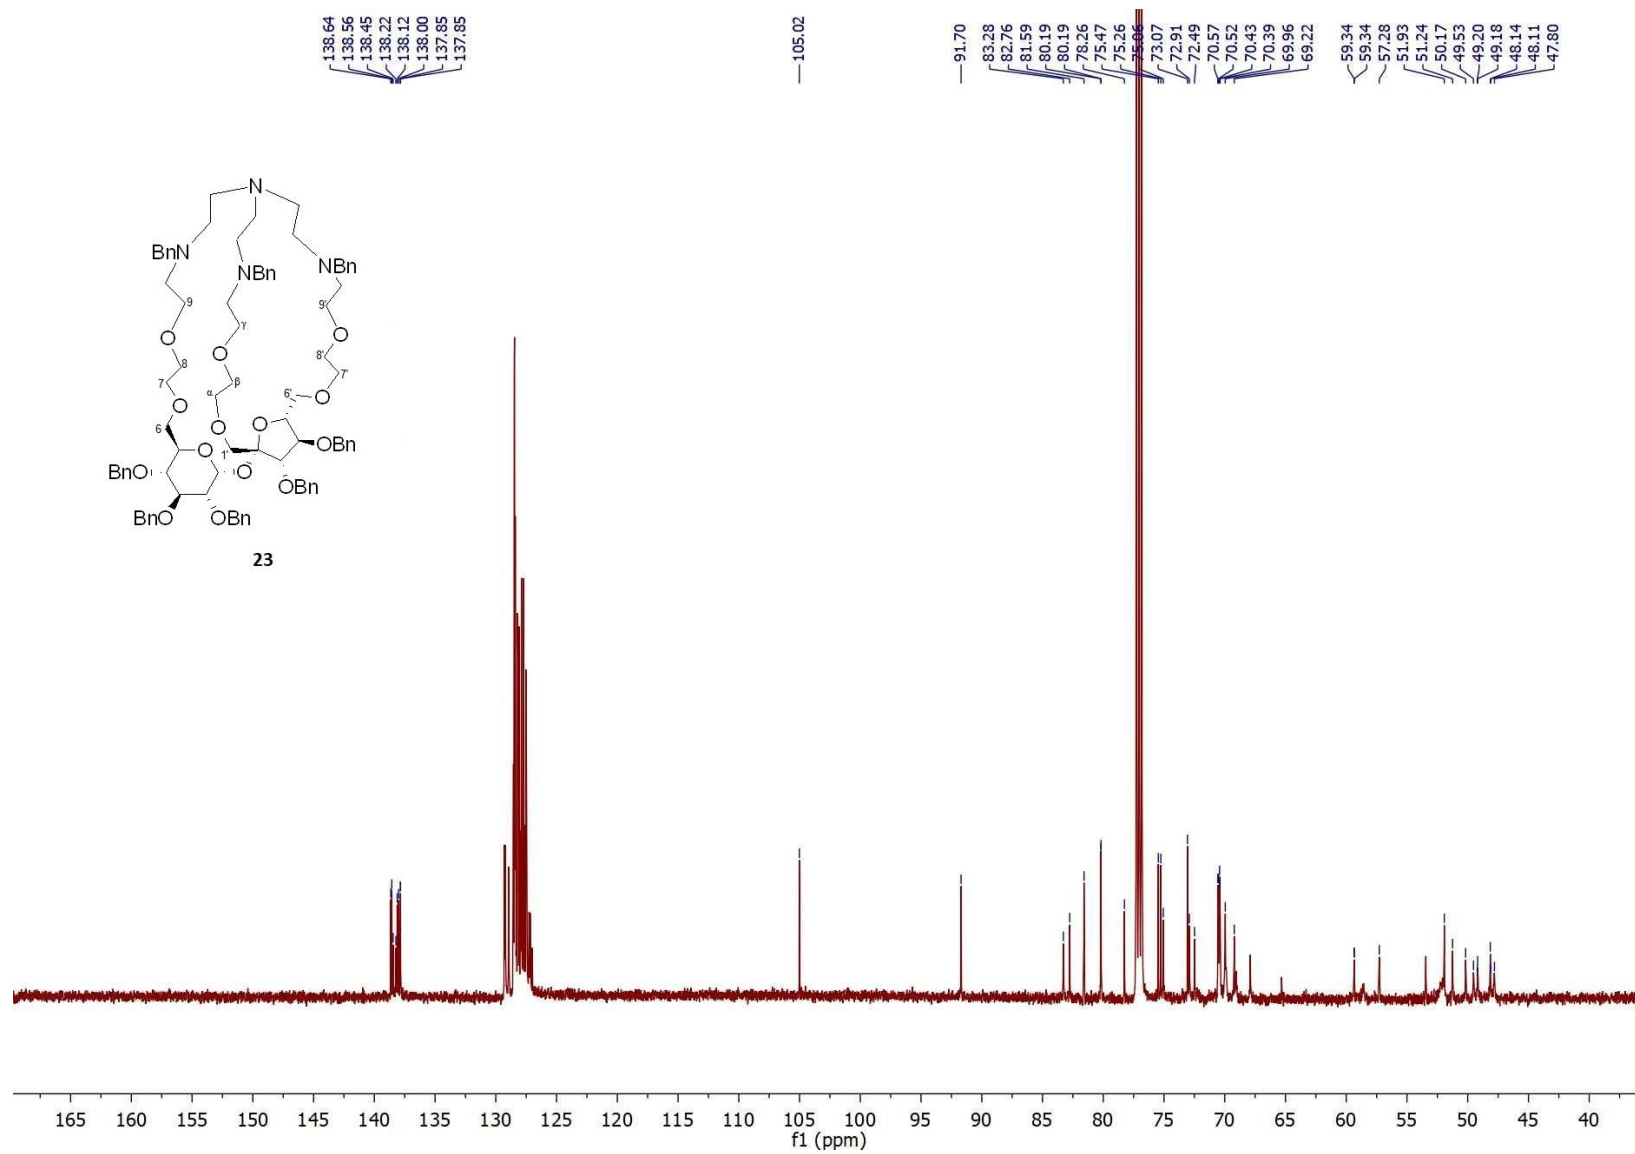

**Figure S41**  $^{13}\text{C}$  NMR spectrum of compound **23** (acetone- $d_6$ ).

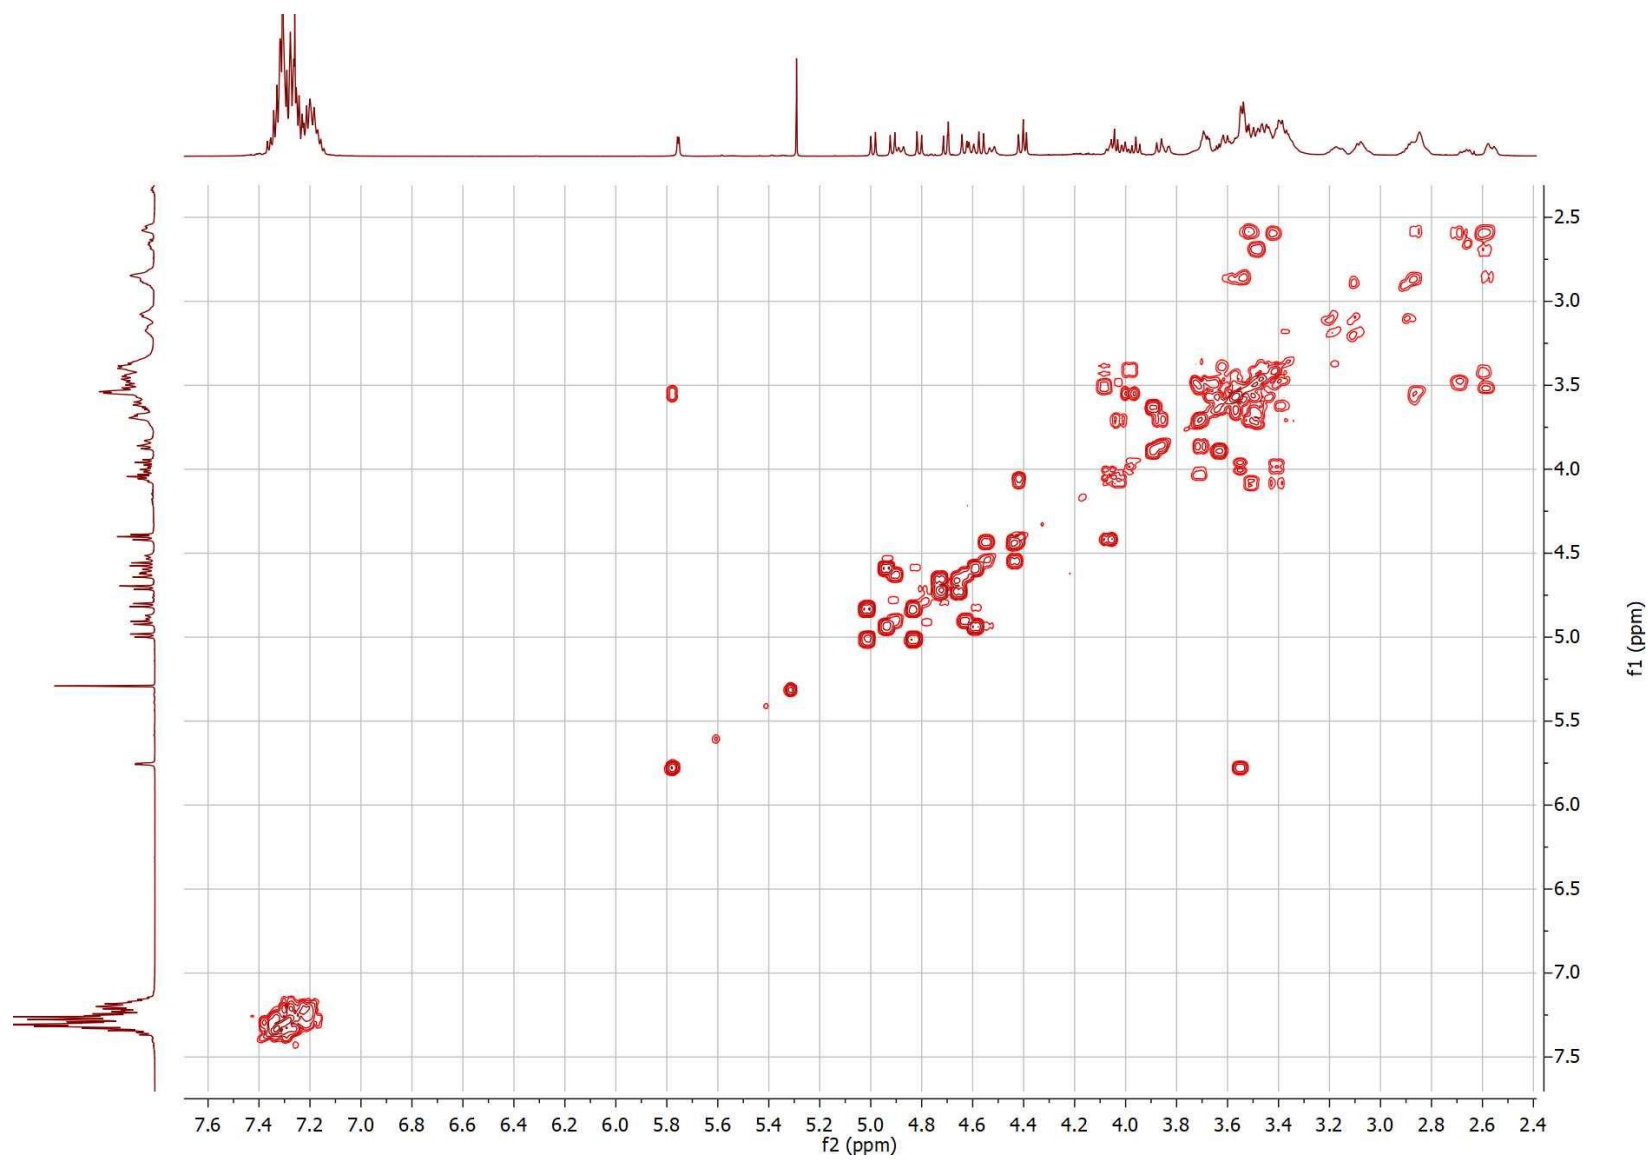

**Figure S42** gCOSY spectrum of compound **23**.

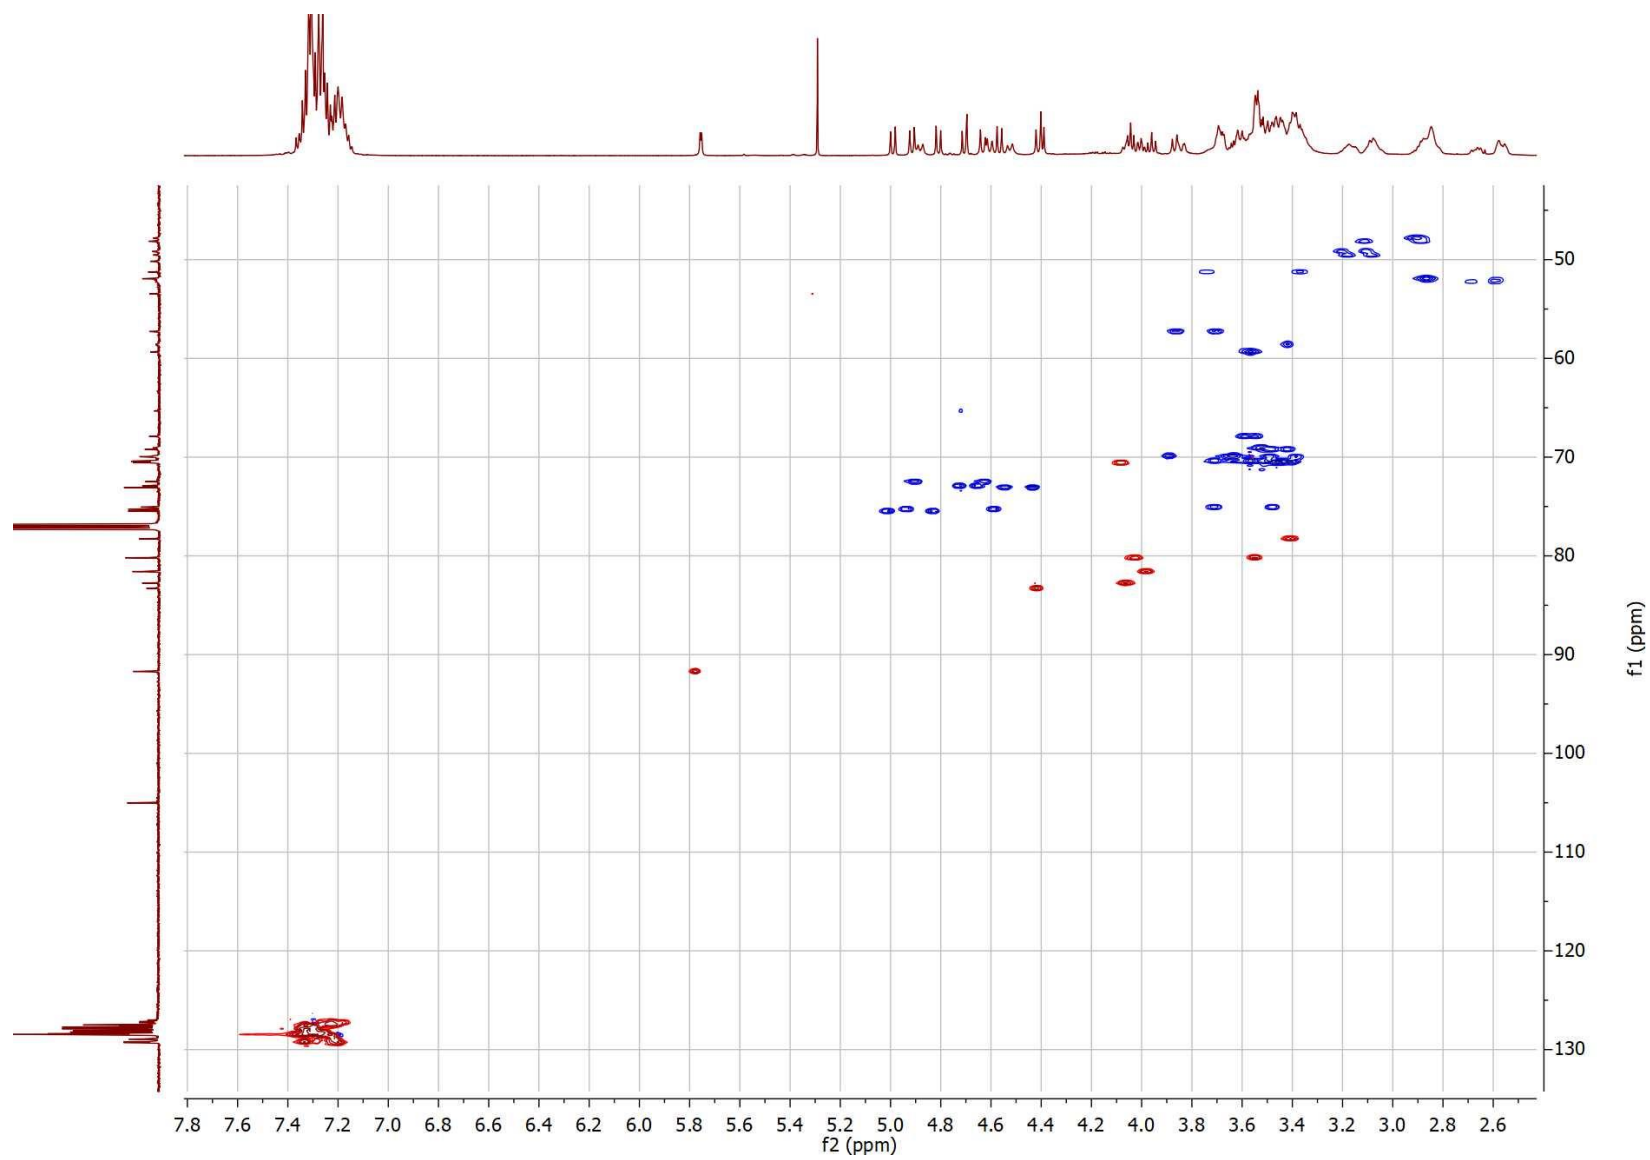

**Figure S43** gHSQCAD spectrum of compound **23**.
